# Supplementary material for: Selective detection of membrane-bound amyloid-β oligomers using SERS “hot-spots”: toward early diagnostics for Alzheimer's disease
Source: Royal Society of Chemistry journal article supplement (doi:10.1039/d5nr03999a), 2026-01-01
Supplement: d5nr03999a1.xlsx [file d5nr03999a1.xlsx]

## Sheet: Figure 1
Figure 1B	Wavelength	AgNP3		Figure 1C	29.4		Figure 1E	Wavelength (nm)	AgNP Bare	AgNP-RB nanoconstruct_5 min activation	AgNP-RB nanoconstruct_10 min activation	AgNP-RB nanoconstruct_15 min activation
	800	0.004			29.4			300	0.175248	0.0584416	0.0423721	0.101699
	799	0.004			29.7			301	0.172228	0.0560065	0.041339	0.0972611
	798	0.004			29.6			302	0.16769	0.0529762	0.0399944	0.0913005
	797	0.004			29.7			303	0.162261	0.0495536	0.0380922	0.0855792
	796	0.004			29.3			304	0.156707	0.0463609	0.0352061	0.0806412
	795	0.004			28.8			305	0.152517	0.0431142	0.0326807	0.0772478
	794	0.004			29.5			306	0.148258	0.0396645	0.0304178	0.0735063
	793	0.004			30.1			307	0.143999	0.0361472	0.0274004	0.0691991
	792	0.004			29			308	0.13889	0.0326975	0.0245636	0.0653269
	791	0.004			29			309	0.133781	0.0285579	0.0208905	0.0609977
	790	0.004			28.7			310	0.128311	0.0246212	0.0177095	0.0569949
	789	0.004						311	0.122896	0.0214962	0.0152664	0.0536446
	788	0.004						312	0.118734	0.0188988	0.0127249	0.0512734
	787	0.004						313	0.115811	0.0166937	0.0115936	0.0487717
	786	0.004						314	0.113348	0.0146104	0.00926511	0.0462484
	785	0.004						315	0.111496	0.0131358	0.00834672	0.0440513
	784	0.004						316	0.109687	0.0115801	0.00733003	0.041615
	783	0.004						317	0.108281	0.0100108	0.00596897	0.0400487
	782	0.004						318	0.107501	0.00836039	0.00493588	0.0394831
	781	0.004						319	0.10636	0.00731872	0.00455872	0.0374601
	780	0.004						320	0.105274	0.00639881	0.00373881	0.0363072
	779	0.004						321	0.104522	0.00587121	0.00355842	0.0350237
	778	0.004						322	0.104536	0.00587121	0.00385359	0.0342841
	777	0.004						323	0.104244	0.00639881	0.005723	0.0343059
	776	0.004						324	0.10501	0.00703463	0.00723164	0.033414
	775	0.004						325	0.105622	0.00854978	0.00931422	0.0347192
	774	0.004						326	0.106861	0.0102543	0.0111345	0.0358721
	773	0.004						327	0.107084	0.0122159	0.0131186	0.0368945
	772	0.004						328	0.107863	0.0143669	0.013922	0.0385695
	771	0.004						329	0.108977	0.0162202	0.0154632	0.0407666
	770	0.004						330	0.110981	0.0190882	0.0182342	0.0435944
	769	0.004						331	0.113668	0.0219291	0.0216449	0.0469445
	768	0.004						332	0.117315	0.0255005	0.0249407	0.0504904
	767	0.004						333	0.12085	0.0301407	0.0295487	0.0551241
	766	0.004						334	0.125207	0.0354437	0.0340418	0.059388
	765	0.004						335	0.129675	0.0405844	0.0395187	0.0651746
	764	0.004						336	0.135396	0.0456845	0.043536	0.0710481
	763	0.004						337	0.141089	0.0516369	0.0494392	0.076791
	762	0.004						338	0.147325	0.0593479	0.0566378	0.0829471
	761	0.004						339	0.153951	0.0673701	0.0647218	0.0902999
	760	0.004						340	0.160828	0.0760552	0.0727731	0.0977397
	759	0.004						341	0.168163	0.0850514	0.0820543	0.105375
	758	0.004						342	0.176807	0.0946293	0.0909746	0.113098
	757	0.004						343	0.186259	0.103896	0.100124	0.12156
	756	0.004						344	0.196949	0.113623	0.108159	0.131197
	755	0.004						345	0.207959	0.12477	0.118605	0.141247
	754	0.004						346	0.219304	0.137121	0.129608	0.152168
	753	0.004						347	0.230565	0.15	0.140922	0.163958
	752	0.004						348	0.242104	0.162595	0.152138	0.175183
	751	0.004						349	0.253073	0.174283	0.162731	0.184711
	750	0.004						350	0.264612	0.186242	0.175226	0.196437
	749	0.004						351	0.275873	0.198755	0.187639	0.208271
	748	0.004						352	0.287218	0.211066	0.199807	0.221453
	747	0.004						353	0.297936	0.223309	0.212646	0.233418
	746	0.004						354	0.308236	0.23562	0.224387	0.245165
	745	0.004						355	0.31862	0.248417	0.236472	0.25626
	744	0.004						356	0.328809	0.260187	0.247655	0.266266
	743	0.004						357	0.33808	0.271347	0.257428	0.274294
	742	0.004						358	0.34799	0.282643	0.269792	0.284975
	741	0.004						359	0.35811	0.294819	0.281713	0.296722
	740	0.004						360	0.368299	0.307116	0.293372	0.309556
	739	0.004						361	0.378419	0.319535	0.305523	0.321151
	738	0.004						362	0.388037	0.332549	0.317493	0.333507
	737	0.004						363	0.398421	0.34678	0.330267	0.346277
	736	0.004						364	0.409293	0.361066	0.344271	0.359808
	735	0.004						365	0.419454	0.375	0.357766	0.372555
	734	0.004						366	0.429741	0.388366	0.371409	0.385629
	733	0.005						367	0.440849	0.402462	0.385347	0.399225
	732	0.004						368	0.453001	0.41756	0.400089	0.414236
	731	0.004						369	0.464916	0.433185	0.415634	0.428224
	730	0.004						370	0.477165	0.449621	0.431818	0.443081
	729	0.004						371	0.49018	0.466585	0.448314	0.458809
	728	0.005						372	0.504099	0.483942	0.466795	0.475408
	727	0.005						373	0.517226	0.500812	0.484422	0.49144
	726	0.005						374	0.529711	0.516788	0.500885	0.506689
	725	0.005						375	0.543116	0.533117	0.517185	0.522156
	724	0.005						376	0.556716	0.549716	0.533976	0.538384
	723	0.005						377	0.569939	0.566788	0.551177	0.554482
	722	0.005						378	0.58436	0.583644	0.569051	0.57169
	721	0.005						379	0.598976	0.600636	0.586597	0.589114
	720	0.005						380	0.614148	0.618114	0.60424	0.606322
	719	0.005						381	0.62932	0.63539	0.620458	0.62242
	718	0.005						382	0.643644	0.65234	0.637282	0.639105
	717	0.005						383	0.658259	0.66898	0.653139	0.654724
	716	0.005						384	0.672026	0.684131	0.668438	0.66882
	715	0.005						385	0.686085	0.698688	0.684098	0.683286
	714	0.005						386	0.700505	0.712784	0.698856	0.696665
	713	0.005						387	0.714578	0.726975	0.71322	0.709848
	712	0.005						388	0.728804	0.740909	0.726781	0.722052
	711	0.005						389	0.742612	0.754654	0.739292	0.734386
	710	0.005						390	0.756017	0.768696	0.752493	0.747721
	709	0.005						391	0.768878	0.781439	0.764856	0.760273
	708	0.005						392	0.780905	0.793506	0.77681	0.77239
	707	0.005						393	0.793015	0.805519	0.789519	0.784942
	706	0.005						394	0.805056	0.817668	0.8018	0.79782
	705	0.005						395	0.817166	0.830425	0.81482	0.810916
	704	0.005						396	0.829777	0.843655	0.828316	0.823664
	703	0.005						397	0.842249	0.85694	0.842204	0.837173
	702	0.005						398	0.85486	0.871185	0.856585	0.85066
	701	0.005						399	0.867262	0.88447	0.871557	0.865475
	700	0.005						400	0.879108	0.8977	0.885609	0.879397
	699	0.005						401	0.890675	0.910457	0.899925	0.893776
	698	0.005						402	0.902535	0.92289	0.913338	0.907829
	697	0.005						403	0.914185	0.935281	0.926112	0.921229
	696	0.005						404	0.92663	0.947294	0.938672	0.934565
	695	0.005						405	0.938099	0.958252	0.950692	0.946507
	694	0.005						406	0.949249	0.968642	0.962515	0.957841
	693	0.005						407	0.9598	0.97757	0.972813	0.968348
	692	0.005						408	0.969126	0.985268	0.980929	0.976811
	691	0.005						409	0.977172	0.991328	0.987964	0.984577
	690	0.005						410	0.984007	0.995887	0.993162	0.99032
	689	0.005						411	0.989491	0.999012	0.99695	0.995497
	688	0.005						412	0.994196	1.00099	0.999328	0.998651
	687	0.005						413	0.997411	1.00099	1.00021	0.999674
	686	0.005						414	0.999429	0.999297	0.999442	0.999804
	685	0.005						415	1.00018	0.995698	0.996425	0.997368
	684	0.005						416	0.999527	0.991085	0.991752	0.993931
	683	0.005						417	0.997258	0.984632	0.985931	0.988601
	682	0.005						418	0.993096	0.976907	0.978125	0.981596
	681	0.005						419	0.987611	0.967221	0.968844	0.973264
	680	0.005						420	0.980526	0.955844	0.957251	0.961496
	679	0.005						421	0.971339	0.942221	0.94351	0.9484
	678	0.005						422	0.960691	0.926907	0.927358	0.933629
	677	0.005						423	0.94808	0.909348	0.909714	0.916966
	676	0.005						424	0.933854	0.890422	0.890726	0.898845
	675	0.005						425	0.918292	0.870942	0.87172	0.878918
	674	0.006						426	0.901602	0.851042	0.851781	0.858187
	673	0.006						427	0.884217	0.829897	0.830824	0.836868
	672	0.006						428	0.865425	0.807657	0.808179	0.812961
	671	0.006						429	0.844156	0.78355	0.783845	0.788466
	670	0.006						430	0.822037	0.758536	0.758494	0.762253
	669	0.006						431	0.798499	0.731913	0.731864	0.735757
	668	0.006						432	0.773388	0.704288	0.704021	0.70752
	667	0.006						433	0.747749	0.6773	0.676276	0.679414
	666	0.006						434	0.722276	0.650785	0.649022	0.651635
	665	0.006						435	0.697026	0.625433	0.622261	0.625291
	664	0.006						436	0.671859	0.6	0.595992	0.598382
	663	0.006						437	0.646149	0.574283	0.570215	0.572016
	662	0.006						438	0.619744	0.548552	0.544586	0.545411
	661	0.006						439	0.593407	0.52266	0.518595	0.519002
	660	0.006						440	0.566069	0.497362	0.492834	0.493006
	659	0.006						441	0.539135	0.472714	0.466696	0.466967
	658	0.006						442	0.513578	0.449391	0.443018	0.442864
	657	0.006						443	0.489609	0.428084	0.420701	0.421023
	656	0.006						444	0.467296	0.407278	0.399744	0.400118
	655	0.006						445	0.445651	0.387121	0.379821	0.380278
	654	0.006						446	0.423407	0.366924	0.360275	0.360961
	653	0.006						447	0.401637	0.347376	0.34086	0.340947
	652	0.006						448	0.379477	0.328612	0.321396	0.321456
	651	0.006						449	0.357484	0.310214	0.302637	0.301138
	650	0.006						450	0.337635	0.292857	0.285747	0.283213
	649	0.006						451	0.319344	0.277706	0.269956	0.266658
	648	0.006						452	0.303114	0.263866	0.255772	0.252366
	647	0.006						453	0.287955	0.251218	0.243031	0.239118
	646	0.006						454	0.273089	0.238799	0.231241	0.226696
	645	0.006						455	0.259309	0.226745	0.219238	0.214449
	644	0.006						456	0.245626	0.215679	0.20753	0.202267
	643	0.006						457	0.232472	0.20506	0.19738	0.191042
	642	0.007						458	0.220626	0.194683	0.186852	0.180992
	641	0.007						459	0.209226	0.185579	0.177456	0.171659
	640	0.007						460	0.199413	0.177462	0.16911	0.164502
	639	0.007						461	0.189766	0.170062	0.161567	0.157193
	638	0.007						462	0.180872	0.162838	0.154073	0.150297
	637	0.007						463	0.172589	0.155587	0.146973	0.143706
	636	0.007						464	0.164056	0.149621	0.140102	0.137092
	635	0.007						465	0.156415	0.143899	0.133871	0.131349
	634	0.007						466	0.149455	0.138569	0.127443	0.125476
	633	0.007						467	0.142829	0.13336	0.122163	0.120146
	632	0.007						468	0.136677	0.128477	0.117604	0.115578
	631	0.007						469	0.130998	0.123985	0.113521	0.110553
	630	0.007						470	0.125653	0.119819	0.109504	0.105071
	629	0.007						471	0.120071	0.115774	0.106061	0.10035
	628	0.007						472	0.114907	0.112405	0.102273	0.0957167
	627	0.007						473	0.11023	0.109091	0.098485	0.0921706
	626	0.007						474	0.105817	0.10625	0.0943527	0.0892773
	625	0.007						475	0.101599	0.102841	0.0907942	0.0861448
	624	0.007						476	0.0973679	0.0999053	0.0876457	0.0835562
	623	0.007						477	0.0936931	0.0973079	0.0843989	0.080402
	622	0.007						478	0.0899349	0.0946293	0.0818081	0.076791
	621	0.007						479	0.0862322	0.0924919	0.079201	0.0745069
	620	0.007						480	0.0835038	0.0903409	0.0771679	0.071766
	619	0.008						481	0.080831	0.0886634	0.0748724	0.070352
	618	0.008						482	0.0783674	0.0867695	0.0727407	0.0684812
	617	0.008						483	0.0756809	0.0850108	0.070855	0.0660449
	616	0.008						484	0.073412	0.0834551	0.0689527	0.0641523
	615	0.008						485	0.0712824	0.0818858	0.0672965	0.0624774
	614	0.008						486	0.0687213	0.0805195	0.0658043	0.0606936
	613	0.008						487	0.0662296	0.0792884	0.064394	0.0594535
	612	0.008						488	0.0640163	0.0778409	0.0629837	0.0584308
	611	0.008						489	0.0622903	0.0768669	0.0611471	0.0572994
	610	0.008						490	0.0603416	0.0761634	0.0600649	0.0552761
	609	0.008						491	0.058532	0.0752435	0.0575395	0.0527961
	608	0.008						492	0.0563465	0.0746618	0.0569328	0.0524262
	607	0.008						493	0.0559985	0.0740801	0.0569164	0.0519478
	606	0.008						494	0.0548015	0.074053	0.0559817	0.0505773
	605	0.008						495	0.0536045	0.0732008	0.054965	0.0492068
	604	0.008						496	0.052338	0.0720779	0.053276	0.0482715
	603	0.008						497	0.0509323	0.0709551	0.0519312	0.0472273
	602	0.008						498	0.0493176	0.0701028	0.0503407	0.0455305
	601	0.009						499	0.0474245	0.0691829	0.0479139	0.0436163
	600	0.009						500	0.044891	0.06875	0.0474878	0.0433552
	599	0.009						501	0.0445569	0.068033	0.0468649	0.0420718
	598	0.009						502	0.0429979	0.0675866	0.046324	0.0408971
	597	0.009						503	0.0415085	0.0667884	0.045455	0.0400487
	596	0.009						504	0.0407985	0.066342	0.044586	0.0397442
	595	0.009						505	0.0395875	0.065625	0.0440447	0.0406578
	594	0.009						506	0.0385851	0.064908	0.0430773	0.0403533
	593	0.009						507	0.0372906	0.0644616	0.0425361	0.0395049
	592	0.009						508	0.0365669	0.0636634	0.041667	0.0383302
	591	0.009						509	0.0359128	0.063217	0.0407979	0.0370468
	590	0.009						510	0.0348271	0.0625	0.0402567	0.0358721
	589	0.009						511	0.0338804	0.061783	0.0392893	0.0350237
	588	0.009						512	0.0333513	0.0613366	0.0384037	0.0347192
	587	0.009						513	0.0328918	0.0605384	0.0377642	0.035176
	586	0.01						514	0.032154	0.0598079	0.037879	0.0356328
	585	0.01						515	0.0314163	0.0595644	0.0379938	0.0353283
	584	0.01						516	0.0309571	0.0591856	0.0373543	0.0344799
	583	0.01						517	0.0301359	0.0589421	0.0364687	0.0333052
	582	0.01						518	0.0296767	0.0582116	0.0355013	0.0320218
	581	0.01						519	0.028939	0.0574134	0.0346157	0.0308471
	580	0.01						520	0.0282012	0.0566829	0.0339762	0.0299987
	579	0.01						521	0.0277417	0.0564394	0.034091	0.0296942
	578	0.01						522	0.0269203	0.0560606	0.0342058	0.030151
	577	0.01						523	0.0261685	0.0558171	0.0335663	0.030151
	576	0.01						524	0.0256255	0.0550866	0.0326807	0.030151
	575	0.01						525	0.0257229	0.0542884	0.0317133	0.030151
	574	0.01						526	0.0258204	0.0535579	0.0308277	0.030151
	573	0.01						527	0.0252776	0.0530303	0.0301882	0.0306078
	572	0.01						528	0.0245261	0.0528409	0.0299586	0.0303033
	571	0.01						529	0.0237049	0.0534091	0.0306474	0.0294549
	570	0.01						530	0.0229534	0.0532197	0.0304178	0.0282802
	569	0.01						531	0.0224106	0.0526921	0.0297783	0.0269968
	568	0.01						532	0.022508	0.0519616	0.0288927	0.0258221
	567	0.01						533	0.0226054	0.0511634	0.0279253	0.0249737
	566	0.01						534	0.0220626	0.0504329	0.0270397	0.0246692
	565	0.01						535	0.0213111	0.0499053	0.0264002	0.025126
	564	0.011						536	0.0204899	0.0497159	0.0261706	0.025126
	563	0.011						537	0.0197384	0.0502841	0.0268594	0.025126
	562	0.011						538	0.0191956	0.0500947	0.0266298	0.025126
	561	0.011						539	0.0190007	0.0495671	0.0259903	0.025126
	560	0.011						540	0.019293	0.0488366	0.0251047	0.025126
	559	0.011						541	0.019293	0.0480384	0.0241373	0.025126
	558	0.011						542	0.0195854	0.0473079	0.0232517	0.025126
	557	0.011						543	0.0193905	0.0467803	0.0226122	0.025126
	556	0.011						544	0.0188475	0.0465909	0.0223826	0.025126
	555	0.011						545	0.0180957	0.046875	0.022727	0.025126
	554	0.011						546	0.0172743	0.046875	0.022727	0.0255828
	553	0.011						547	0.0165225	0.046875	0.022727	0.0252783
	552	0.011						548	0.0159795	0.046875	0.022727	0.0244299
	551	0.011						549	0.0157846	0.046875	0.022727	0.0232552
	550	0.011						550	0.016077	0.0471591	0.022727	0.0219718
	549	0.011						551	0.016077	0.0464015	0.0223826	0.0198835
	548	0.011						552	0.016077	0.0468209	0.0229566	0.0205578
	547	0.012						553	0.0163693	0.0467668	0.0233665	0.0213409
	546	0.012						554	0.0161744	0.0463745	0.0239569	0.0224504
	545	0.012						555	0.0156316	0.0457792	0.0238093	0.0226679
	544	0.012						556	0.0148801	0.0451163	0.0230878	0.0224504
	543	0.012						557	0.0140589	0.0445211	0.0219563	0.0217978
	542	0.012						558	0.0133074	0.0444129	0.0205788	0.0207101
	541	0.012						559	0.0127646	0.0429924	0.0184307	0.0182737
	540	0.012						560	0.0125697	0.0435065	0.0192834	0.0207101
	539	0.012						561	0.012862	0.0431142	0.0198737	0.0217978
	538	0.012						562	0.012862	0.0425189	0.02071	0.0224504
	537	0.013						563	0.012862	0.0421402	0.020874	0.0226679
	536	0.013						564	0.012862	0.0413555	0.02071	0.0224504
	535	0.013						565	0.012862	0.0404356	0.0205623	0.0217978
	534	0.013						566	0.012862	0.039651	0.0195129	0.0207101
	533	0.013						567	0.012862	0.0383793	0.0177257	0.0191874
	532	0.013						568	0.012862	0.0379329	0.0175291	0.020101
	531	0.013						569	0.012862	0.0374053	0.0165619	0.020101
	530	0.013						570	0.012862	0.0375	0.0156766	0.020101
	529	0.014						571	0.012862	0.0375947	0.0150372	0.020101
	528	0.014						572	0.0131544	0.0370671	0.0148077	0.020101
	527	0.014						573	0.0129595	0.0363366	0.015152	0.0205579
	526	0.014						574	0.0124165	0.0355384	0.015152	0.0202533
	525	0.014						575	0.0116647	0.0348079	0.015152	0.0194048
	524	0.014						576	0.0108433	0.0345644	0.015152	0.0182298
	523	0.015						577	0.0100915	0.0341856	0.015152	0.0169462
	522	0.015						578	0.00954855	0.0339421	0.015152	0.0157712
	521	0.015						579	0.00935364	0.0332116	0.015152	0.0149227
	520	0.015						580	0.009646	0.0324134	0.015152	0.0146181
	519	0.015						581	0.009646	0.0316829	0.015152	0.015075
	518	0.015						582	0.009646	0.0314394	0.0154964	0.015075
	517	0.016						583	0.009646	0.0310606	0.0152668	0.015075
	516	0.016						584	0.009646	0.0308171	0.0146273	0.015075
	515	0.016						585	0.009646	0.0300866	0.0137417	0.015075
	514	0.016						586	0.009646	0.0292884	0.0127743	0.015075
	513	0.017						587	0.009646	0.028842	0.0118887	0.015075
	512	0.017						588	0.009646	0.028125	0.0112492	0.015075
	511	0.017						589	0.009646	0.027408	0.0110196	0.015075
	510	0.017						590	0.009646	0.0269616	0.011364	0.015075
	509	0.018						591	0.009646	0.0261634	0.011364	0.015075
	508	0.018						592	0.009646	0.0254329	0.011364	0.015075
	507	0.018						593	0.009646	0.0251894	0.011364	0.015075
	506	0.018						594	0.009646	0.0248106	0.011364	0.015075
	505	0.019						595	0.009646	0.0245671	0.011364	0.0155318
	504	0.019						596	0.009646	0.0238366	0.011364	0.0152273
	503	0.019						597	0.009646	0.0230384	0.011364	0.0143789
	502	0.02						598	0.009646	0.022592	0.011364	0.0132042
	501	0.02						599	0.009646	0.021875	0.0117084	0.0119208
	500	0.021						600	0.009646	0.021158	0.0114788	0.0107461
	499	0.021						601	0.009646	0.0207116	0.0108393	0.00989773
	498	0.021						602	0.009646	0.0199134	0.00995375	0.00959318
	497	0.022						603	0.009646	0.0191829	0.00898625	0.01005
	496	0.023						604	0.009646	0.0189394	0.00810074	0.01005
	495	0.023						605	0.009646	0.0185606	0.00746121	0.01005
	494	0.023						606	0.009646	0.0183171	0.00723164	0.01005
	493	0.024						607	0.009646	0.0175866	0.007576	0.01005
	492	0.024						608	0.009646	0.0167884	0.007576	0.01005
	491	0.025						609	0.009646	0.0160579	0.007576	0.01005
	490	0.026						610	0.009646	0.0158144	0.007576	0.01005
	489	0.026						611	0.00993827	0.0154356	0.007576	0.01005
	488	0.027						612	0.00974342	0.0151921	0.007576	0.01005
	487	0.028						613	0.00920063	0.0144616	0.007576	0.01005
	486	0.028						614	0.00844907	0.0136634	0.007576	0.01005
	485	0.029						615	0.00762793	0.0129329	0.007576	0.01005
	484	0.03						616	0.00687637	0.0124053	0.007576	0.01005
	483	0.031						617	0.00633358	0.0122159	0.007576	0.01005
	482	0.032						618	0.00613873	0.0127841	0.007576	0.01005
	481	0.033						619	0.006431	0.0125947	0.00792036	0.01005
	480	0.034						620	0.006431	0.0120671	0.00769079	0.01005
	479	0.035						621	0.006431	0.0113366	0.00705126	0.01005
	478	0.036						622	0.006431	0.0105384	0.00616575	0.01005
	477	0.037						623	0.006431	0.0098079	0.00519825	0.01005
	476	0.038						624	0.006431	0.0092803	0.00431274	0.01005
	475	0.04						625	0.006431	0.00909091	0.00367321	0.01005
	474	0.041						626	0.006431	0.00965909	0.00344364	0.01005
	473	0.043						627	0.006431	0.0094697	0.003788	0.01005
	472	0.044						628	0.006431	0.0089421	0.003788	0.01005
	471	0.046						629	0.006431	0.00821158	0.003788	0.01005
	470	0.048						630	0.006431	0.00741342	0.003788	0.01005
	469	0.05						631	0.006431	0.0066829	0.003788	0.01005
	468	0.052						632	0.006431	0.0061553	0.003788	0.01005
	467	0.054						633	0.006431	0.00596591	0.003788	0.01005
	466	0.056						634	0.006431	0.00625	0.003788	0.01005
	465	0.059						635	0.006431	0.00625	0.003788	0.01005
	464	0.061						636	0.006431	0.00625	0.003788	0.01005
	463	0.064						637	0.006431	0.00625	0.003788	0.01005
	462	0.067						638	0.006431	0.00653409	0.003788	0.01005
	461	0.07						639	0.006431	0.0063447	0.003788	0.01005
	460	0.073						640	0.006431	0.0058171	0.003788	0.01005
	459	0.077						641	0.006431	0.00508658	0.003788	0.01005
	458	0.08						642	0.006431	0.00428842	0.003788	0.0105068
	457	0.084						643	0.006431	0.0035579	0.003788	0.0102023
	456	0.089						644	0.006431	0.0030303	0.003788	0.0093539
	455	0.094						645	0.006431	0.00284091	0.003788	0.00817922
	454	0.099						646	0.006431	0.003125	0.00413236	0.00689578
	453	0.103						647	0.006431	0.003125	0.00390279	0.0057211
	452	0.109						648	0.006431	0.003125	0.00326326	0.00487273
	451	0.114						649	0.006431	0.003125	0.00237775	0.00456818
	450	0.12						650	0.006431	0.003125	0.00141025	0.005025
	449	0.128						651	0.006431	0.003125	0.000524745	0.005025
	448	0.134						652	0.006431	0.003125	-0.000114788	0.005025
	447	0.142						653	0.006431	0.00340909	-0.000344364	0.005025
	446	0.149						654	0.006431	0.0032197	0	0.005025
	445	0.157						655	0.006431	0.0026921	0	0.005025
	444	0.164						656	0.006431	0.00196158	0	0.005025
	443	0.171						657	0.006431	0.00116342	0	0.005025
	442	0.179						658	0.006431	0.0004329	0	0.005025
	441	0.188						659	0.006431	-9.4697e-05	0	0.005025
	440	0.196						660	0.006431	-0.000284091	0	0.005025
	439	0.206						661	0.006431	0	0	0.005025
	438	0.215						662	0.006431	0	0	0.005025
	437	0.224						663	0.006431	0	0	0.005025
	436	0.233						664	0.006431	0	0	0.005025
	435	0.241						665	0.006431	0	0	0.005025
	434	0.25						666	0.006431	0	0	0.005025
	433	0.259						667	0.006431	0	0	0.005025
	432	0.268						668	0.006431	0	0	0.005025
	431	0.276						669	0.006431	0	0	0.005025
	430	0.285						670	0.006431	0	0	0.005025
	429	0.294						671	0.006431	0	0	0.005025
	428	0.301						672	0.006431	0	0	0.005025
	427	0.308						673	0.006431	0	0	0.005025
	426	0.315						674	0.006431	0	0	0.005025
	425	0.321						675	0.00672336	0	0	0.005025
	424	0.327						676	0.00652845	0.000284545	0	0.005025
	423	0.333						677	0.00598549	9.48485e-05	0	0.005025
	422	0.339						678	0.0052337	-0.000433593	0	0.005025
	421	0.345						679	0.0044123	-0.00116528	0	0.005025
	420	0.349						680	0.00366051	-0.00196472	0	0.005025
	419	0.353						681	0.00311755	-0.00269641	0	0.005025
	418	0.357						682	0.00292264	-0.00322485	0	0.005025
	417	0.36						683	0.003215	-0.00341455	0	0.005025
	416	0.362						684	0.003215	-0.00313	0	0.005025
	415	0.364						685	0.003215	-0.00313	0.000344545	0.005025
	414	0.366						686	0.003215	-0.00313	-0.000229697	0.005025
	413	0.367						687	0.003215	-0.00313	-0.000295325	0.005025
	412	0.368						688	0.003215	-0.00313	-0.000771126	0.005025
	411	0.368						689	0.003215	-0.00313	-0.00149303	0.005025
	410	0.367						690	0.003215	-0.00313	-0.00229697	0.005025
	409	0.366						691	0.003215	-0.00313	-0.00301887	0.005025
	408	0.365						692	0.003215	-0.00313	-0.00349468	0.005025
	407	0.363						693	0.003215	-0.00313	-0.0035603	0.005025
	406	0.361						694	0.003215	-0.00313	-0.00413455	0.005025
	405	0.358						695	0.003215	-0.00313	-0.00379	0.005025
	404	0.354						696	0.003215	-0.00313	-0.00379	0.005025
	403	0.351						697	0.003215	-0.00313	-0.00379	0.005025
	402	0.347						698	0.003215	-0.00313	-0.00379	0.005025
	401	0.344						699	0.003215	-0.00313	-0.00379	0.005025
	400	0.339						700	0.003215	-0.00313	-0.00379	0.005025
	399	0.335						701	0.003215	-0.00313	-0.00379	0.005025
	398	0.33						702	0.003215	-0.00313	-0.00379	0.005025
	397	0.326						703	0.003215	-0.00313	-0.00379	0.005025
	396	0.321						704	0.003215	-0.00313	-0.00379	0.005025
	395	0.316						705	0.003215	-0.00313	-0.00379	0.005025
	394	0.311						706	0.003215	-0.00313	-0.00379	0.005025
	393	0.307						707	0.003215	-0.00313	-0.00379	0.005025
	392	0.302						708	0.003215	-0.00313	-0.00379	0.005025
	391	0.297						709	0.003215	-0.00313	-0.00379	0.005025
	390	0.292						710	0.003215	-0.00313	-0.00379	0.005025
	389	0.287						711	0.003215	-0.00313	-0.00379	0.005025
	388	0.281						712	0.003215	-0.00313	-0.00379	0.005025
	387	0.275						713	0.003215	-0.00313	-0.00379	0.005025
	386	0.27						714	0.003215	-0.00313	-0.00379	0.005025
	385	0.264						715	0.003215	-0.00313	-0.00379	0.005025
	384	0.259						716	0.003215	-0.00313	-0.00379	0.005025
	383	0.254						717	0.003215	-0.00313	-0.00379	0.005025
	382	0.248						718	0.003215	-0.00313	-0.00379	0.005025
	381	0.243						719	0.003215	-0.00313	-0.00379	0.005025
	380	0.238						720	0.003215	-0.00313	-0.00379	0.005025
	379	0.232						721	0.003215	-0.00313	-0.00379	0.005025
	378	0.227						722	0.003215	-0.00313	-0.00379	0.005025
	377	0.222						723	0.003215	-0.00313	-0.00379	0.005025
	376	0.217						724	0.003215	-0.00313	-0.00379	0.005025
	375	0.212						725	0.003215	-0.00313	-0.00379	0.005025
	374	0.208						726	0.003215	-0.00313	-0.00379	0.005025
	373	0.203						727	0.003215	-0.00313	-0.00379	0.005025
	372	0.198						728	0.003215	-0.00313	-0.00379	0.005025
	371	0.194						729	0.003215	-0.00313	-0.00379	0.005025
	370	0.189						730	0.003215	-0.00313	-0.00379	0.005025
	369	0.182						731	0.003215	-0.00313	-0.00379	0.005025
	368	0.178						732	0.003215	-0.00313	-0.00379	0.005025
	367	0.174						733	0.003215	-0.00313	-0.00379	0.005025
	366	0.17						734	0.003215	-0.00313	-0.00379	0.005025
	365	0.166						735	0.003215	-0.00313	-0.00379	0.005025
	364	0.161						736	0.003215	-0.00313	-0.00379	0.005025
	363	0.158						737	0.003215	-0.00313	-0.00379	0.005025
	362	0.154						738	0.003215	-0.00313	-0.00379	0.005025
	361	0.149						739	0.003215	-0.00313	-0.00379	0.005025
	360	0.145						740	0.003215	-0.00313	-0.00379	0.005025
	359	0.141						741	0.003215	-0.00313	-0.00379	0.005025
	358	0.137						742	0.003215	-0.00284636	-0.00379	0.005025
	357	0.134						743	0.003215	-0.00331909	-0.00379	0.005025
	356	0.13						744	0.003215	-0.00337312	-0.00379	0.005025
	355	0.126						745	0.003215	-0.00404844	-0.00379	0.005025
	354	0.122						746	0.003215	-0.00445364	-0.00379	0.005025
	353	0.118						747	0.003215	-0.00430506	-0.00379	0.005025
	352	0.114						748	0.003215	-0.00435909	-0.00379	0.005025
	351	0.109						749	0.003215	-0.00448065	-0.00379	0.005025
	350	0.106						750	0.003215	-0.00453468	-0.00379	0.005025
	349	0.102						751	0.003215	-0.00527753	-0.00379	0.005025
	348	0.098						752	0.003215	-0.00553416	-0.00379	0.005025
	347	0.094						753	0.003215	-0.00634455	-0.00379	0.005025
	346	0.09						754	0.003215	-0.00653364	-0.00379	0.005025
	345	0.087						755	0.003215	-0.00625	-0.00379	0.005025
	344	0.083						756	0.003215	-0.00625	-0.00379	0.005025
	343	0.079						757	0.003215	-0.00625	-0.00379	0.005025
	342	0.076						758	0.003215	-0.00625	-0.00379	0.005025
	341	0.073						759	0.003215	-0.00625	-0.00379	0.005025
	340	0.071						760	0.003215	-0.00625	-0.00379	0.005025
	339	0.069						761	0.003215	-0.00625	-0.00379	0.005025
	338	0.066						762	0.003215	-0.00625	-0.00379	0.005025
	337	0.064						763	0.003215	-0.00625	-0.00379	0.005025
	336	0.062						764	0.003215	-0.00625	-0.00379	0.005025
	335	0.06						765	0.00350727	-0.00625	-0.00379	0.005025
	334	0.059						766	0.00302015	-0.00625	-0.00379	0.005025
	333	0.058						767	0.00267221	-0.00625	-0.00379	0.005025
	332	0.057						768	0.00275571	-0.00625	-0.00379	0.005025
	331	0.056						769	0.002199	-0.00625	-0.00379	0.005025
	330	0.056						770	0.00192065	-0.00625	-0.00379	0.005025
	329	0.055						771	0.00192065	-0.00625	-0.00379	0.005025
	328	0.055						772	0.002199	-0.00625	-0.00379	0.005025
	327	0.055						773	0.00275571	-0.00625	-0.00379	0.005025
	326	0.055						774	0.00267221	-0.00625	-0.00379	0.005025
	325	0.055						775	0.00302015	-0.00625	-0.00379	0.005025
	324	0.055						776	0.00350727	-0.00625	-0.00379	0.005025
	323	0.055						777	0.003215	-0.00625	-0.00379	0.005025
	322	0.056						778	0.003215	-0.00625	-0.00379	0.005025
	321	0.056						779	0.003215	-0.00625	-0.00379	0.005025
	320	0.057						780	0.003215	-0.00625	-0.00379	0.005025
	319	0.058						781	0.00350727	-0.00625	-0.00379	0.005025
	318	0.059						782	0.00302015	-0.00625	-0.00379	0.005025
	317	0.06						783	0.00267221	-0.00625	-0.00379	0.005025
	316	0.061						784	0.00246344	-0.00625	-0.00379	0.005025
	315	0.062						785	0.00239385	-0.00625	-0.00379	0.005025
	314	0.064						786	0.00246344	-0.00625	-0.00379	0.005025
	313	0.065						787	0.00267221	-0.00625	-0.00379	0.005025
	312	0.067						788	0.00302015	-0.00625	-0.00379	0.005025
	311	0.068						789	0.00379955	-0.00625	-0.00379	0.005025
	310	0.07						790	0.00302015	-0.00625	-0.00379	0.005025
	309	0.073						791	0.00267221	-0.00625	-0.00379	0.005025
	308	0.074						792	0.00246344	-0.00625	-0.00379	0.005025
	307	0.078						793	0.00239385	-0.00625	-0.00379	0.005025
	306	0.079						794	0.00246344	-0.00625	-0.00379	0.005025
	305	0.081						795	0.00296448	-0.00625	-0.00379	0.005025
	304	0.083						796	0.00311758	-0.00625	-0.00379	0.005025
	303	0.086						797	0.0030619	-0.00625	-0.00379	0.005025
	302	0.088						798	0.00201807	-0.00625	-0.00379	0.005025
	301	0.091						799	0.00119693	-0.00625	-0.00379	0.005025
	300	0.094						800	0.000445368	-0.00625	-0.00379	0.005025

## Sheet: Figure 2
Figure 2A	Time (hours)	Repeat 1	Repeat 2	Repeat 3	Repeat 4		Figure 2C		Number of oligomers (outer diameter)	Number of oligomers (inner diameter)		Figure 2E	Wavenumber	Buffer	3.5 µM Aß	1.75 µM Aß	875 nM Aß	437 nM Aß		Figure 2F	0 nM Aß	3.5 µM Aß	1.75 µM Aß	875 nM Aß	437 nM Aß	218 nM Aß
	0	0.2829	0.4285	0.5116	0.3318			0 to 5 nm	0	1			98.9355	13681.1	13606.1	13330.3	15016.4	16073.2			0.340791	0.109422	0.0731508	0.116574	0.132064	0.129492
	0.166594	0.3791	0.6163	0.6235	0.6495			5 to 10 nm	4	11			100.898	13555.8	13589.1	13267.7	14948.4	16006.2			0.276706	0.101081	0.0865548	0.108259	0.156111	0.147476
	0.333261	0.6486	0.7088	0.6053	0.5743			10 to 15 nm	2	9			102.861	13415	13543.2	13200.9	14828.6	15902.9			0.287621	0.0834536	0.0821415	0.094843	0.144676	0.152528
	0.499928	0.6997	0.7012	0.5406	0.7091			15 to 20 nm	5	17			104.822	13241.9	13481.7	13143.3	14727.5	15762.7			0.277548	0.143766	0.0908567	0.129137	0.145429	0.20792
	0.666594	0.5777	0.654	0.4042	0.4267			20 to 25 nm	14	4			106.785	13028.8	13406.8	13079.6	14636	15567.9			0.276645	0.172554	0.0751328	0.122023	0.149372	0.160148
	0.833261	0.5782	0.4748	0.3517	0.8178			25 to 30 nm	7	3			108.746	12823.2	13324.4	13007.4	14572.4	15386.4			0.338601	0.154522	0.0797817	0.139124	0.150975	0.197464
	0.999928	0.612	0.5362	0.3773	0.6387			30 to 35 nm	10	0			110.705	12628.9	13181.6	12900	14470	15266.8			0.272422	0.110338	0.0837232	0.139569	0.140046	0.166868
	1.16659	0.5462	0.4136	0.5218	0.5902			35 to 40 nm	3	0			112.666	12443.4	13055.9	12775.7	14358.7	15068.1			0.646732	0.105636	0.076182	0.121228	0.13922	0.191911
	1.33326	0.5466	0.387	0.5613	0.2633								114.625	12229	12975.8	12649.4	14248.7	14821.6			0.268955	0.0677375	0.0925633	0.187384	0.183677	0.155846
	1.49993	0.4594	0.3919	0.4365	0.2639								116.586	12051	12916.9	12556.8	14126.4	14590.1			0.306603	0.0865686	0.0801368	0.131737	0.167051	0.241091
	1.66659	0.572	0.4312	0.6031	0.324								118.543	11939	12845.4	12466.6	13972.2	14397.1			0.220709	0.110647	0.11127	0.151664	0.154399	0.214464
	1.83326	0.5745	0.6007	0.7255	0.395								120.502	11824.4	12791.3	12414.5	13836.2	14222.4			0.377186	0.0829126	0.0968024	0.133137	0.196126	0.258178
	1.99993	0.7461	0.5057	0.4717	0.3804								122.459	11692.7	12718.4	12369.9	13723.3	14060.3			0.32218	0.0971233	0.0906175	0.144237	0.166522	0.200354
	2.16659	0.6957	0.6116	0.7426	0.4558								124.418	11568.9	12671.6	12300.1	13610.2	13963.9			0.326217	0.0870432	0.0941121	0.14336	0.173638	0.182576
	2.33326	0.7566	0.6894	0.5853	0.4364								126.373	11444.1	12618.7	12254.3	13556.5	13873.3			0.32752	0.0866651	0.118013	0.135849	0.184388	0.179568
	2.49993	0.7941	0.7469	0.795	0.3619								128.33	11299	12603.5	12213.6	13543.2	13746.8			0.198144	0.0953868	0.0934861	0.167925	0.186883	0.227966
	2.66659	0.9356	0.7017	0.693	0.3504								130.285	11170.9	12598.3	12182.3	13509	13611.5			0.180019	0.143473	0.122566	0.157403	0.202394	0.202151
	2.83326	0.7588	0.6271	0.7123	0.5737								132.242	11104.6	12598.5	12170.9	13500.9	13525			0.302966	0.132673	0.113682	0.169666	0.187782	0.24297
	2.99993	0.7666	0.7165	0.7406	0.6661								134.195	11046.1	12582.8	12187.2	13465.7	13493.2				0.224884	0.318449	0.371846	0.379099	0.356646
	3.16659	0.9245	0.6577	0.5834	0.521								136.15	10945.7	12575.5	12197.7	13434.9	13457.5				0.210015	0.326629	0.285055	0.453996	0.412663
	3.33326	1.1167	0.8649	0.6931	0.6402								138.105	10839.1	12522.2	12189.8	13369.9	13434.6				0.204887	0.268458	0.313863	0.352388	0.365302
	3.49993	0.9965	0.7706	0.8464	0.6624								140.059	10776.3	12507.2	12128.3	13322.6	13416.5				0.23545	0.25725	0.304427	0.417088	0.439631
	3.66659	1.1652	0.8156	0.9	0.6635								142.012	10742.7	12470.6	12095	13320.7	13361.6				0.261181	0.28184	0.286029	0.387849	0.38209
	3.83326	0.8767	0.8952	0.7489	0.91								143.963	10737.7	12467.7	12041.6	13313.7	13294.7				0.276069	0.244766	0.268247	0.297587	0.313404
	3.99993	0.9266	1.0468	1.0277	0.9437								145.916	10739.1	12451.2	12034.2	13302.2	13244				0.278695	0.241654	0.354697	0.527836	0.375329
	4.16659	1.2214	1.1351	0.637	0.8302								147.867	10780.3	12461.2	12007.4	13257.5	13217.8				0.274207	0.226416	0.334217	0.481629	0.359435
	4.33326	1.4214	0.9333	1.0479	0.9149								149.818	10772.3	12481.3	12049.5	13211.9	13209.5					0.25409	0.342054	0.308918	0.399855
	4.49993	1.3115	1.1078	1.2426	0.8056								151.77	10718.2	12489.7	12042.5	13185.5	13174.7					0.265251	0.254778	0.32493	0.380785
	4.66659	1.4073	1.1382	1.0498	0.8428								153.719	10657.5	12478.1	12058.6	13142.2	13168.1					0.351979	0.290772	0.46344	0.440995
	4.83326	1.4436	1.1284	1.1035	1.1405								155.668	10599.7	12451.3	12033.5	13139.8	13116.1					0.283887	0.239697	0.371155	0.395508
	4.99993	1.4993	1.1283	0.9282	0.777								157.617	10520.8	12421.7	11995.4	13084.1	13016.4					0.329327	0.327933	0.414437	0.452241
	5.16659	1.6095	1.1619	0.9492	1.0832								159.566	10426.1	12371	11955.5	13064.2	12935.7						0.303059	0.419525	0.443176
	5.33326	1.6607	1.2031	0.9668	0.9428								161.514	10313.1	12285.6	11976.1	13032	12813.6						0.330639	0.413501	0.472575
	5.49993	1.5107	1.4312	1.1116	1.1186								163.463	10213.7	12241.7	11927.8	12944.6	12668.2
	5.66659	1.0296	1.1894	0.8943	1.2143								165.41	10097.3	12205.9	11927	12929.5	12551
	5.83326	1.0166	1.1098	1.0982	1.3892								167.355	9988.82	12163.2	11893.9	12900.9	12424.2
	5.99993	1.0765	1.4432	1.0968	1.3668								169.303	9917.49	12172.7	11895.7	12903.2	12374
	6.16659	1.5274	1.2555	1.2408	1.2958								171.248	9866.21	12191.8	11883.5	12893	12317.6
	6.33326	1.2678	1.2494	1.0663	1.4793								173.193	9828.01	12205.9	11852.5	12905.5	12319.2
	6.49993	1.7676	1.4471	1.2474	1.4744								175.139	9823.19	12249.2	11874.7	12989.6	12364
	6.66659	1.327	1.2277	1.289	1.612								177.082	9866.69	12338.4	11948	13056.4	12414.9
	6.83326	1.2578	1.2868	1.2529	1.4949								179.027	9965.12	12419.3	11996.3	13173.5	12487.2
	6.99993	1.459	1.2962	1.3893	1.5753								180.971	10071.4	12493.3	12097.9	13319.6	12608.4
	7.16659	1.2989	1.3631	1.1907	1.4107								182.912	10186.5	12528.3	12172.8	13425.1	12746.1
	7.33326	1.2353	1.3224	1.3229	1.4669								184.855	10333.1	12586.8	12268.3	13541.3	12898.8
	7.49993	1.8643	1.4123	1.2986	1.3736								186.797	10494.2	12643.9	12344.8	13602.5	13054.2
	7.66659	1.4083	1.3722	1.3353	1.6813								188.738	10648.1	12667.6	12346.8	13683.4	13270.2
	7.83326	1.2568	1.3805	1.306	1.383								190.68	10805.7	12662.4	12349	13756	13467.4
	7.99993	1.3569	1.4188	1.3224	1.4894								192.621	10986.4	12673.7	12338.8	13863.2	13696.3
	8.16659	1.6832	1.3055	1.4709	1.5979								194.561	11217.1	12696.6	12307.8	14011.6	13923.4
	8.33326	1.7189	1.408	1.5573	1.5253								196.5	11426.7	12741.4	12318.4	14177.9	14172.5
	8.49993	1.3069	1.2596	1.1167	1.4977								198.439	11650.5	12787.6	12341	14381.1	14483.4
	8.66659	1.5186	1.3479	1.4345	1.4685								200.379	11905.3	12895.4	12382.2	14592.7	14766.7
	8.83326	1.2298	1.3908	1.5629	1.5269								202.316	12164.5	12989.6	12440	14757.3	15061.3
	8.99993	1.2826	1.3231	1.5332	1.6312								204.254	12433.6	13088.1	12500.9	14937.4	15395.3
	9.16659	1.6762	1.5009	1.424	1.573								206.191	12718	13081.3	12603	15114.4	15733.6
	9.33326	1.3375	1.3899	1.2757	1.1427								208.129	13031.5	13094.3	12695.4	15327.7	16106.5
	9.49993	1.233	1.5691	1.575	1.615								210.064	13369.7	13136.5	12768.5	15522.5	16477.9
	9.66659	1.7379	1.5975	1.4049	1.4499								212	13721.6	13216.5	12856.8	15750.9	16872.8
	9.83326	1.6805	1.4564	1.4608	1.5428								213.936	14071.6	13322.5	12924.5	15982.5	17260.4
	9.99993	1.259	1.5224	1.3664	1.4654								215.871	14428	13467.4	13001.5	16186.1	17600.3
	10.1666	1.239	1.4718	1.5858	1.4558								217.805	14794.2	13598.4	13077.5	16386.3	17984
	10.3333	1.6209	1.5127	1.397	1.526								219.738	15148	13758.2	13180.2	16610.5	18424.2
	10.4999	1.3599	1.5523	1.4889	1.5999								221.672	15537	13873.5	13313.9	16853.9	18862.1
	10.6666	1.3403	1.509	1.5702	1.5432								223.605	15861.4	13950.7	13453.2	17102.2	19337.7
	10.8333	1.3713	1.4898	1.377	1.357								225.539	16212.4	14029.3	13566.9	17340.1	19726.2
	10.9999	1.4196	1.5486	1.5045	1.4535								227.471	16590.7	14076.7	13633.6	17584.4	20138.4
	11.1666	1.3462	1.5136	1.44	1.49								229.402	16930.3	14124.8	13653.1	17726	20482
	11.3333	1.4017	1.5548	1.6401	1.2861								231.332	17247.3	14174.3	13642.8	17869.5	20800.9
	11.4999	1.4115	1.5654		1.6152								233.264	17518.2	14218	13573.8	17987.6	21125.3
	11.6666	1.2707	1.5707		1.4781								235.193	17784.6	14227.6	13519.5	18105.7	21402.7
	11.8333	1.7747	1.5942		1.767								237.123	17975.3	14160.4	13465.4	18160.7	21576.7
	11.9999	1.528	1.5749		1.7061								239.053	18011.1	14102.8	13451	18159.1	21660.3
	12.1666		1.5125		1.2615								240.982	17892.2	14041.2	13436	18070.4	21526.7
	12.3333		1.5622		1.5912								242.91	17629.8	13928	13371.6	17922.1	21293.4
	12.4999		1.6343		1.3718								244.838	17191.1	13847.3	13265.7	17612.3	20828.3
	12.6666		1.6005		1.6399								246.766	16571	13779.8	13140.4	17251.8	20231.2
	12.8333		1.6381		1.4021								248.691	15812.6	13688.8	12994.5	16823.6	19467.5
	12.9999				1.539								250.619	15024.5	13583.2	12823.5	16397.3	18622.9
	13.1666				1.5968								252.545	14184.8	13449.6	12674.9	15910.9	17727.2
	13.3333				1.5961								254.471	13378.8	13346.7	12556.4	15456.6	16795.3
	13.4999				1.4427								256.395	12565.8	13204.1	12495.4	15009.9	15934.4
	13.6666				1.7755								258.32	11811.9	13051.6	12435.4	14652.2	15102
	13.8333				1.6028								260.244	11148.6	12910.6	12368.7	14317	14353.6
	13.9999				1.7641								262.168	10566.3	12789.6	12337.1	14008.5	13729.3
	14.1666				1.5237								264.09	10052.6	12721.3	12306.7	13760.5	13208
	14.3333				1.6585								266.014	9617.75	12648.4	12242.1	13579.8	12751.3
	14.4999				1.5432								267.936	9261.58	12615.7	12183.4	13401.1	12353.2
	14.6666				1.5848								269.857	8955.38	12561.6	12130.8	13278.9	11995.3
	14.8333				1.5996								271.777	8677.15	12480.1	12107.1	13179.7	11754.4
	14.9999				1.5556								273.699	8420.33	12438.6	12057.9	13085	11492.7
	15.1666				1.6007								275.619	8216.73	12407.6	11986.1	12994.4	11320.4
	15.3333				1.4667								277.539	8060.79	12431.3	11951	12931.3	11167.7
													279.459	7899.26	12475.8	11955.9	12884.5	11066.1
													281.377	7789.24	12442.1	11954.8	12863	10946.3
													283.297	7705.28	12434.3	11956.8	12825.6	10844.9
													285.215	7623.84	12408.9	11999.5	12805.4	10718.8
													287.131	7556.72	12383.1	12037.7	12796.9	10631.4
													289.049	7482.93	12352.5	12038.9	12766.3	10533.6
													290.965	7415.12	12327.2	12028.3	12739.2	10491.1
													292.881	7344.13	12353.7	12029.9	12741	10429.2
													294.797	7276.99	12380.7	12057.3	12752	10431.2
													296.713	7213.98	12392.6	12078.8	12756.5	10418.2
													298.627	7182.64	12446.1	12158.7	12784.2	10400.4
													300.541	7157.29	12513.6	12219.5	12811.2	10337.7
													302.455	7134.84	12593.2	12256.8	12841.7	10320.9
													304.369	7103.67	12617.9	12273.4	12891.9	10325.3
													306.281	7095.72	12661.5	12302.4	12941.8	10350.8
													308.193	7088.62	12693.1	12335.3	12973.4	10387.8
													310.105	7093.61	12734.4	12378.7	13011.5	10426.9
													312.018	7099.02	12778.8	12425.7	12987	10463.5
													313.928	7120.55	12845.2	12524.3	13010.6	10491.3
													315.838	7109.65	12876	12499.3	13011.9	10488.2
													317.748	7096.06	12872	12491.7	13032.4	10503.9
													319.658	7120.71	12883.6	12498.5	13117.8	10510.6
													321.568	7124.44	12904.2	12493.2	13177.4	10515
													323.477	7135.5	12912.5	12503.2	13192.3	10543.3
													325.385	7164.02	12937.2	12549	13216.8	10538.1
													327.293	7185.87	12986.1	12594.1	13225.4	10593.3
													329.199	7224.31	13039.1	12650.8	13268.4	10628.5
													331.105	7223.18	13090.4	12671	13298.4	10663.2
													333.014	7239.73	13142.3	12735.6	13346.1	10735.7
													334.918	7273.7	13169.9	12770.1	13394	10821.3
													336.824	7267.28	13200.4	12780.8	13432.9	10884.7
													338.729	7284.29	13228.9	12801.5	13437.3	10882.4
													340.633	7283.2	13268.2	12866.4	13457.3	10913.9
													342.537	7242.08	13268	12890.7	13500.5	10910.3
													344.441	7230.57	13265	12910	13526.6	10857.5
													346.344	7208.83	13301.8	12946.1	13548.6	10816.2
													348.248	7186.99	13359.7	12945.1	13564.8	10813.9
													350.148	7164.35	13324.9	12947.5	13564.1	10832.6
													352.051	7148.73	13347.9	12947	13612	10833.7
													353.953	7157.81	13376.6	12956.6	13652	10850.2
													355.854	7193.56	13411.9	13026.3	13720.7	10911.1
													357.754	7213.48	13391.7	13081.1	13765	10934.2
													359.654	7264.25	13424.2	13101.8	13799.1	10968.7
													361.553	7324.87	13518.8	13137.3	13853.3	11016.1
													363.451	7372.18	13601.1	13171.6	13924.8	11087
													365.352	7361.18	13661.8	13238.7	13971	11125.8
													367.248	7361.85	13761.9	13295.8	14003	11171.3
													369.146	7346.06	13854.7	13361.6	14064.8	11232.6
													371.043	7388.5	13914.4	13452.5	14151.6	11274.7
													372.939	7404.68	13962.3	13526.4	14212.6	11330.1
													374.836	7451.33	14009.9	13559.1	14267.6	11372.4
													376.732	7487.42	14091.3	13587.6	14353.7	11401.9
													378.627	7519.41	14106.6	13586.4	14409.4	11466.2
													380.521	7534.54	14129.2	13636.3	14414.2	11490.8
													382.416	7569.63	14108.5	13706.9	14407.8	11502.9
													384.311	7580.8	14128.5	13754.1	14396.5	11494.2
													386.205	7627.8	14133.2	13775	14423.9	11540.6
													388.098	7666.73	14173.4	13831.6	14456.3	11626.5
													389.99	7717.75	14193.4	13883.4	14516.2	11681
													391.883	7744.05	14265.8	13919.6	14597.9	11764.7
													393.773	7752.31	14347.7	13953.7	14656.4	11897.1
													395.664	7767.75	14398.9	14015.6	14716.8	11977.1
													397.555	7778.58	14401.3	14075.1	14738.7	11969.7
													399.445	7744.4	14422.9	14088.8	14745.3	11936
													401.336	7692.63	14418.9	14043.1	14738.8	11895.1
													403.225	7645.17	14449.6	14042	14764.1	11863.2
													405.113	7639.19	14470.7	14040.9	14784.2	11829.4
													407.002	7629.83	14454.5	14039.8	14773	11836.7
													408.891	7610.72	14487.9	14075	14804.4	11883.4
													410.777	7614.17	14469.8	14079.9	14832.2	11888.8
													412.666	7653.44	14480	14133.1	14835	11870.7
													414.553	7636.87	14481.9	14178.6	14882.7	11902.3
													416.438	7641.22	14529.3	14181.7	14932.9	11934.4
													418.324	7667.29	14601.1	14251.3	15024.2	11993.7
													420.209	7729.6	14705.5	14307.5	15084.5	12096.4
													422.094	7779.26	14735.2	14350.2	15140.7	12213.5
													423.979	7831.08	14794.5	14401.3	15228.3	12319.3
													425.861	7892.55	14841.9	14407.1	15334.9	12380.1
													427.746	7959.22	14952.6	14455.4	15415.7	12463.6
													429.629	8016.78	15067.3	14510.9	15523.4	12578.9
													431.512	8131.24	15176.3	14603.6	15617.4	12716.8
													433.393	8256.08	15251.2	14734.9	15704	12805.6
													435.275	8312.79	15318.6	14846.3	15749.9	12887.5
													437.156	8335.53	15338.4	14926.2	15793.3	12950.7
													439.037	8342.24	15330	14948.6	15824.2	12983.7
													440.918	8334.3	15318.5	14983.5	15860	12946.4
													442.797	8283.31	15373.1	14991.1	15873	12905.9
													444.676	8252.06	15426.2	15033.4	15923.9	12878.9
													446.555	8253.62	15489.6	15099.5	15955.3	12942.3
													448.434	8290.05	15548.4	15134.8	16050.4	12977.7
													450.312	8317.38	15625.2	15210.1	16133.7	13025.6
													452.189	8362.95	15724.9	15329.8	16275	13117.9
													454.066	8416.73	15804	15398.1	16420.3	13220.1
													455.943	8497.95	15924.2	15534	16517.7	13287.1
													457.818	8541.79	16048.6	15611.6	16617.7	13380.1
													459.695	8565.5	16158.3	15671.1	16650.9	13443.8
													461.57	8606.17	16213.4	15683.5	16662.3	13548.8
													463.445	8648.94	16239.5	15680.9	16706.2	13599.9
													465.32	8686.33	16226.1	15677.7	16683.2	13627.5
													467.193	8697.39	16161.5	15690.2	16705	13634.7
													469.066	8686.57	16053.2	15628.5	16679.5	13563.9
													470.939	8689.34	15990.5	15623.2	16661.2	13524
													472.812	8666.16	15991	15634.3	16671.8	13526.6
													474.686	8643.14	16092	15702.6	16717.6	13520
													476.557	8711.94	16186.1	15800.7	16787.1	13583.1
													478.428	8766.16	16318.2	15943.9	16922.4	13689.5
													480.299	8861.67	16432.8	16069.4	17026.2	13818.4
													482.17	8954.99	16488.4	16165.8	17151.4	13925.9
													484.039	9026.9	16523	16224.5	17204.7	13981.5
													485.908	9093.6	16621.9	16290.6	17257.2	14034.6
													487.777	9151.95	16778	16355.5	17338.6	14078.2
													489.646	9185.4	16979.5	16486.1	17483.4	14135.2
													491.514	9272.72	17132.8	16551.3	17613	14234.5
													493.381	9303.81	17259.5	16601.5	17739.4	14348.5
													495.248	9317.59	17300.8	16640.1	17828.8	14441.4
													497.115	9294.46	17296.2	16634.5	17838.8	14499
													498.982	9257.1	17259.6	16638.1	17810.4	14488.8
													500.848	9177.79	17219.1	16596.9	17750.7	14430.6
													502.713	9106.55	17158.2	16564	17757.3	14353.2
													504.578	9005.32	17064.7	16571.3	17757.8	14301.6
													506.443	8976.64	16952.6	16543.2	17748.2	14254.3
													508.307	8969.92	16905	16521.4	17710	14220.1
													510.17	8932.17	16878.2	16513	17678.1	14222.7
													512.033	8927.69	16894.6	16502	17588.1	14230.4
													513.896	8926	16909	16533.2	17558.8	14200.3
													515.758	8910.36	16895.9	16563.1	17581.5	14184.2
													517.621	8925.57	16877	16614.7	17660.7	14171.9
													519.482	8932.83	16843.5	16682.8	17714	14187.9
													521.342	9012.98	16873.6	16720.3	17774.6	14199.8
													523.203	9074.33	16954.4	16751.5	17803.8	14236.1
													525.062	9083.7	17046.9	16756.6	17843.1	14288
													526.924	9130.96	17147.8	16805.5	17830.6	14391.6
													528.781	9139.29	17274.5	16897.5	17854.4	14462.7
													530.641	9173.49	17351.6	17004.9	17921.3	14522.3
													532.5	9210.12	17420.7	17127.7	18045.7	14579.9
													534.357	9203.39	17502.7	17243	18141.2	14649.1
													536.215	9240.97	17566.5	17339.5	18254.2	14700.6
													538.07	9260.22	17623.7	17391	18374	14744.2
													539.928	9240.52	17683.2	17373.4	18509.5	14809.3
													541.783	9274.46	17748.8	17389.6	18577.8	14907.5
													543.639	9297.25	17850.4	17435.2	18593.5	14959.8
													545.494	9394.32	17868.8	17422.7	18601.2	15015.5
													547.35	9462.86	17878.8	17488.2	18643.8	15070.1
													549.203	9520.98	17898	17520.9	18616	15144.6
													551.057	9599.86	17847.1	17569.7	18633.3	15132.7
													552.91	9655.96	17786.1	17561.8	18691.3	15124.1
													554.764	9631.89	17809.1	17552.4	18763.9	15139.7
													556.617	9618.48	17782.6	17538.9	18783.3	15162.6
													558.469	9574.06	17791.7	17570.6	18785.1	15163.4
													560.32	9569.87	17808.8	17543.1	18791	15184.3
													562.172	9561.51	17906	17579.1	18849.1	15242.8
													564.021	9607.32	18039.2	17617.3	18912.4	15334
													565.873	9640.77	18130.2	17697.5	19017.9	15352.7
													567.723	9670.94	18187.3	17739.9	19108.8	15378.8
													569.572	9692.59	18325.7	17848.6	19208	15443.9
													571.42	9686.14	18310.1	17929.5	19255.2	15516.5
													573.27	9642.14	18292	18007.1	19274.9	15510.2
													575.117	9634.74	18298.3	18044.3	19283	15529.9
													576.965	9624.33	18333.6	18031.7	19260.5	15532.6
													578.812	9653.12	18379.7	18073	19266.7	15535.1
													580.658	9674.54	18383.2	18086.7	19254.3	15525.4
													582.504	9702.73	18387	18072.4	19290	15566.5
													584.352	9760.02	18458.5	18114.7	19385.8	15628.3
													586.195	9796.79	18483.8	18154.9	19455.6	15716.3
													588.041	9843.61	18569.4	18287.2	19496	15770
													589.885	9906.37	18714.7	18432.6	19601.4	15874.5
													591.73	9964.48	18939.5	18614.2	19724.2	15990.4
													593.574	10057.1	19170.6	18827.9	19899.9	16144.1
													595.416	10173.4	19381.9	18963.5	20030.1	16284.1
													597.26	10267.8	19537.9	19073.3	20180.7	16489.9
													599.102	10374.9	19669.3	19111.6	20332.5	16637.8
													600.943	10478.1	19710	19134	20373.3	16775.8
													602.785	10553.4	19774.6	19214.7	20396.8	16928.1
													604.627	10657.3	19846.2	19326	20471.3	17089
													606.467	10796.9	19904.6	19519.8	20607.2	17274.3
													608.307	10936.1	20032	19727.7	20803.4	17437.2
													610.146	11072	20237.7	19924.5	20987.7	17560.7
													611.986	11154.8	20379.5	20092.1	21129.4	17656.2
													613.824	11224.5	20482.3	20157	21246.8	17662.6
													615.664	11244.2	20525.5	20133.5	21295.5	17612.3
													617.502	11189.1	20547.1	20099.5	21281.4	17552.7
													619.34	11168.1	20498.6	20063.6	21283.6	17497.1
													621.176	11140.7	20390	20068.4	21276.3	17462.6
													623.014	11085.7	20356.9	20102	21292.9	17411
													624.85	11060.6	20358.3	20168.5	21347.9	17400.1
													626.686	11063.5	20355.6	20262	21388.1	17409.9
													628.52	11103.3	20427.8	20363.7	21476.9	17464.5
													630.355	11138.2	20498.1	20468.7	21538.7	17526.1
													632.189	11175.2	20607.4	20579.4	21575.9	17623.4
													634.023	11232	20732.2	20694.8	21728.8	17774.3
													635.857	11266.3	20867.9	20830.7	21857.4	17849.5
													637.689	11290	20960	20887.5	22024.4	17862.4
													639.523	11356.7	21078.7	20944	22196.6	17945.5
													641.355	11439	21159.7	20950.8	22242	17989.3
													643.188	11498.3	21210.5	20933.9	22285	18031.3
													645.02	11549.2	21171.3	20901	22225.5	18038
													646.85	11577.3	21185.3	20846.8	22125.7	18042.1
													648.68	11581.7	21202.6	20852.2	22094.4	18054.1
													650.51	11535.8	21288.8	20852.4	22036.6	18014.9
													652.34	11516.2	21309.5	20890.5	22106.7	17988.5
													654.17	11515.3	21391.8	20964.2	22195.4	18028.5
													655.998	11511.4	21391.6	20989.4	22195.8	18014.6
													657.826	11510.3	21448.2	21050.9	22248	18041.2
													659.654	11572.4	21486.4	21121.9	22298.2	18065.7
													661.482	11638.3	21556.5	21235.9	22326	18103.4
													663.309	11716.2	21678.7	21347.4	22401.6	18222.6
													665.137	11807.2	21857.3	21426.7	22551.5	18342.8
													666.963	11922.2	21939.5	21543.1	22712.3	18485.6
													668.787	11995.1	22070.9	21589.8	22919	18614.5
													670.613	12022.7	22113.2	21649.9	23026.1	18701.8
													672.438	12081.5	22168.5	21718.1	23110	18775.9
													674.264	12120.2	22155	21717.8	23114	18762.1
													676.086	12114.5	22141.6	21744.8	23078.6	18755.8
													677.91	12117.2	22135.2	21770.5	23049.5	18714.6
													679.734	12143.8	22173.5	21782.4	23113.1	18697.1
													681.557	12183.8	22254.5	21811.6	23152	18789.5
													683.379	12220.9	22388.2	21833.2	23252.7	18883.2
													685.201	12271.8	22540.3	21953.9	23398.2	19064
													687.021	12389.8	22711.9	22127.8	23549.1	19260.7
													688.844	12492.9	22848.6	22279	23589.3	19401.8
													690.664	12545.4	22914.6	22405.8	23658.1	19506.9
													692.484	12571	22891.8	22508.9	23707.2	19435
													694.305	12579	22886.5	22569.5	23744.4	19383.3
													696.123	12559.8	22843.1	22562	23754.3	19286.9
													697.941	12511.6	22754.6	22557.7	23735.4	19173.8
													699.76	12444.7	22769.2	22545.3	23786.8	19131.1
													701.578	12411.9	22821.2	22655.5	23822.9	19149.8
													703.396	12441.2	22861.9	22710.4	23806.4	19255.4
													705.213	12452.1	22964	22717.6	23837.1	19358
													707.029	12482.7	23028.6	22720.6	23908.8	19432.8
													708.846	12559.9	23124.5	22738.7	23953.3	19484.5
													710.662	12603.3	23165.5	22785	24006.3	19530.6
													712.479	12639.8	23217.7	22863.9	24071.6	19530
													714.293	12628.8	23236.8	22917.8	24129.7	19474.8
													716.107	12609	23282.4	23002.2	24206.1	19496.8
													717.922	12657.7	23335.1	23043.6	24257.8	19536.6
													719.734	12710.8	23414.1	23124.3	24354.5	19587.5
													721.549	12761.1	23446.7	23177.4	24474.1	19640.6
													723.361	12845.9	23499.2	23256.7	24551.7	19657.2
													725.174	12918.6	23580	23357.4	24663.5	19761
													726.986	13000.2	23626.5	23441.1	24690.7	19808.5
													728.797	13027.9	23642.8	23497.5	24692.5	19810.5
													730.609	13061.3	23718	23515.9	24708	19903
													732.42	13119.1	23806.2	23580.3	24754.8	19958.4
													734.23	13152.8	23935.3	23653.6	24811.7	20015.8
													736.039	13196.1	24104.5	23747.1	24880.9	20007
													737.85	13222.3	24239	23771.6	24980.3	19988.5
													739.658	13292.3	24381.7	23815.8	25157.7	20031
													741.467	13336.2	24414.1	23853	25196.9	20006.3
													743.275	13359.4	24447.1	23916.6	25270.6	19999
													745.084	13437.3	24445.6	24019	25380.8	20055.8
													746.891	13512.4	24463.9	24157.5	25466.3	20137.9
													748.697	13583	24569.9	24258.5	25524.9	20259.7
													750.504	13669.7	24687.4	24407.5	25631.4	20383.1
													752.311	13722.1	24763.8	24472.6	25738.9	20508.8
													754.115	13790.9	24869.7	24582	25920.7	20680.1
													755.92	13880	25012	24678.6	26007.2	20788
													757.725	13999.4	25166.5	24801.9	26148.1	20929.7
													759.529	14132.2	25269.5	24943.1	26269.8	21028.4
													761.334	14259.1	25382.3	25099.1	26341.8	21101.4
													763.137	14345	25512.2	25205.4	26451.3	21196.5
													764.941	14363.6	25551.5	25266.6	26529.4	21308
													766.744	14339.5	25593.2	25336	26577.4	21377.5
													768.545	14330.8	25677.2	25431.1	26682.9	21403.1
													770.348	14343.2	25777.9	25538.2	26724	21436.5
													772.148	14387.9	25884.7	25604.8	26811.5	21509.2
													773.949	14439.9	26036.3	25696.8	26848.7	21587.9
													775.75	14514	26212.7	25811.6	26932.6	21617.4
													777.551	14557.9	26365.3	25880.8	26958.3	21642
													779.35	14596.3	26391.5	25903.1	26984.4	21628.8
													781.15	14605.5	26471.7	25958.7	27009	21617.2
													782.949	14631.1	26472.4	26068	27048	21542.8
													784.746	14569.3	26452.7	26097.4	27121.8	21483.7
													786.545	14557	26438.4	26094.8	27192.8	21478.2
													788.342	14530.2	26445.2	26173.5	27247	21512.8
													790.141	14508.8	26511.6	26238.9	27344.9	21531
													791.936	14493.7	26620.7	26296.8	27321.2	21475.3
													793.732	14518.7	26697.4	26387.3	27345.9	21447.6
													795.529	14534.8	26746	26464	27373	21437.5
													797.324	14553.9	26806.4	26613.7	27419.8	21428.2
													799.119	14583.1	26881.9	26580.7	27492.7	21474.9
													800.914	14633.9	26940.3	26570.5	27511.2	21569.3
													802.709	14665.6	26905	26575.7	27593.3	21642.9
													804.502	14728.5	26999.5	26674.2	27682.4	21723.2
													806.295	14765.7	27092.4	26757.3	27712.3	21683.7
													808.088	14786	27196.6	26867	27746.6	21677.8
													809.881	14823.5	27256.1	26971	27818.3	21654.5
													811.674	14843.8	27389.1	27100.5	27845.1	21624
													813.465	14960.1	27458.5	27083.3	27870.2	21734.3
													815.256	15021.2	27519.2	27119.9	27911.2	21800.3
													817.047	15099.2	27467.3	27154	28058.1	21855.8
													818.838	15168	27525	27310.4	28157.2	21923.9
													820.627	15180	27561.7	27373.6	28231.5	21897.4
													822.418	15159.2	27580.9	27416.1	28229.6	21908.4
													824.207	15154.1	27704.8	27439.6	28273.8	21955.2
													825.996	15153.9	27803.5	27477.7	28321.5	21945.1
													827.783	15205.3	27893.1	27506.7	28363.9	22040.2
													829.572	15258	27998.2	27593.9	28445.4	22056.5
													831.359	15298.7	28037	27695.5	28564.2	22108.8
													833.146	15364.3	28125.1	27783.2	28638.3	22190.6
													834.934	15445.2	28224	27877.1	28709.2	22229.5
													836.719	15516.2	28242.4	27951.8	28789.1	22203.9
													838.506	15553.5	28328.8	28015.9	28821	22216.3
													840.291	15595.8	28424	28100.1	28894.9	22246.9
													842.076	15595.7	28515.8	28167.2	28949.5	22263.1
													843.859	15597.3	28655	28258.6	29028.9	22301.3
													845.645	15609.5	28802.2	28386	29158.4	22447.2
													847.428	15666.8	28890.3	28521.7	29221.6	22601.7
													849.211	15768.4	29044.7	28716.9	29309.3	22717.5
													850.994	15899.5	29085.1	28895.7	29458.7	22713.6
													852.777	15997.7	29105.3	29089.4	29521.9	22751.3
													854.559	16116.4	29227.5	29212.2	29627	22783.1
													856.342	16189.5	29322.1	29262.5	29688.6	22751.1
													858.123	16246.5	29439.8	29355	29750.6	22806.3
													859.902	16295.5	29628.9	29441.6	29852.6	22930.7
													861.684	16357.5	29757.9	29559.8	29912.5	23059.2
													863.463	16460.3	29928.7	29603.3	30043.4	23236.2
													865.244	16538.3	30022.8	29687.1	30208.6	23373.3
													867.023	16607.8	30100.7	29866	30404.4	23544.3
													868.801	16713.9	30276.5	29981.3	30611.4	23719.9
													870.58	16789.6	30417.9	30147.2	30682.2	23838.1
													872.357	16853	30551.1	30344	30761.2	23970.9
													874.135	16903.6	30742.5	30502.9	30859.6	24067.4
													875.912	16999.8	30941.3	30655.1	31020.5	24183
													877.689	17099.3	31072.2	30715.9	31195.1	24214.8
													879.465	17116	31175.7	30799.9	31330	24207.8
													881.242	17219.4	31220.3	30913	31462.3	24270.3
													883.018	17351.4	31332.3	31029	31567.6	24308.4
													884.793	17448	31417	31172.7	31594.8	24372.6
													886.566	17550.9	31543.8	31308.7	31635.6	24448
													888.342	17649.9	31740.3	31456.3	31767.6	24514.2
													890.115	17770.8	31927.7	31605	31905.8	24637.3
													891.889	17875.7	32064.9	31722.6	32077.9	24631.8
													893.662	17931.1	32202.2	31779.2	32226.4	24692
													895.434	18019.1	32241.2	31820.9	32338.2	24712.7
													897.207	18119.2	32300.6	31963.6	32407.5	24758.1
													898.979	18204	32419.2	32041	32443.2	24867.2
													900.75	18267.3	32603.6	32207.9	32474.7	24953.5
													902.52	18321.9	32811.6	32352.1	32620.9	25057
													904.291	18397.1	33016.2	32500.1	32731.2	25177.1
													906.061	18470.1	33196.8	32621.3	32873.2	25233
													907.83	18538.3	33396.2	32759.6	32975.1	25385.2
													909.6	18610	33433.9	32853.1	33049.6	25421.3
													911.369	18726.5	33494	32979.3	33127.1	25535.7
													913.139	18818.8	33565.4	32964.9	33166.1	25575.7
													914.906	18888.8	33657.2	33081.4	33337.3	25627.5
													916.674	18943.9	33702.5	33141.4	33561.9	25664.6
													918.441	18991.1	33807.2	33230.7	33697.4	25708
													920.207	19030.1	33904.5	33297.9	33837.7	25767.5
													921.975	19097.1	34029.4	33456.9	33905.1	25845.4
													923.74	19152.8	34113.8	33574.6	33975.6	25908.3
													925.506	19188.4	34203.1	33634.8	34032.8	25962
													927.271	19214	34300.3	33665.3	34079.1	25997.8
													929.035	19246.4	34447.1	33816.6	34190.1	26078.1
													930.801	19267.2	34563.7	33942.4	34258.5	26106.2
													932.564	19311.7	34716.9	34063.7	34302.7	26181.6
													934.328	19378.7	34830.2	34090.2	34369.6	26250
													936.092	19512.1	34942.3	34287.4	34415.5	26255.2
													937.854	19626.2	35114.4	34472.5	34568.6	26356.2
													939.617	19761.3	35276.1	34645	34751.7	26410.1
													941.379	19929.6	35426.4	34765.4	34913.3	26582.6
													943.141	20086	35603	34910	35051	26819.7
													944.9	20228.8	35776.2	35079	35163.9	27024.8
													946.662	20324	35956.4	35179.4	35271.8	27194.6
													948.422	20476	36068.4	35273.4	35387.8	27330.3
													950.182	20663.9	36276.8	35516.3	35539.1	27392.3
													951.941	20827.2	36511.1	35732	35787.8	27482.2
													953.701	20977.1	36692.4	35957.9	36060	27524.1
													955.459	21070	36871.3	36081.6	36198.3	27631.3
													957.219	21130.2	36923.8	36124.3	36239.7	27712.9
													958.977	21147.7	37048.9	36181.9	36273.6	27753.8
													960.732	21141.7	37145.8	36218.9	36275.3	27752.1
													962.49	21248.8	37219.3	36326.1	36273.3	27696.3
													964.246	21304.5	37349.6	36509.7	36398.3	27617.7
													966.004	21350.6	37504.4	36724.9	36523.3	27611.1
													967.76	21411.9	37585.8	36923.9	36664.9	27648.3
													969.516	21410.3	37797	37035.7	36759.2	27649.9
													971.27	21430.7	37887	37044	36851.5	27666.1
													973.025	21480	38075.6	37069.5	36964.7	27753.1
													974.779	21548.5	38163.2	37135.9	37088.8	27819.4
													976.533	21640.7	38263	37239.7	37172.6	27810.8
													978.285	21669.1	38258	37433.2	37356.1	27859.1
													980.039	21793.5	38422.2	37686.4	37437.2	27968.3
													981.791	21934.8	38524.8	37912.7	37482.6	28106.1
													983.545	22045.5	38817.9	38061.7	37524.7	28221.5
													985.295	22164	39058	38253.7	37666.6	28394.8
													987.047	22258.5	39236.5	38296.5	37774	28532.5
													988.799	22302.6	39383.8	38378.9	37933.1	28595.3
													990.549	22365.2	39532	38506.7	38098.4	28676.9
													992.299	22457.1	39572.2	38586.3	38344.9	28768.7
													994.049	22566.2	39706.3	38735.5	38541.5	28903.3
													995.799	22640.8	39797.3	38931.3	38588.1	29072.2
													997.547	22738.4	39998.2	39070	38679.6	29206.6
													999.297	22830.5	40188	39279.3	38848.7	29320.4
													1001.04	22906.1	40286	39368	38934.3	29348.9
													1002.79	22931.1	40399.6	39504.5	39039.2	29346.5
													1004.54	23037.8	40495.6	39629.6	39159.7	29416.2
													1006.29	23083	40611.8	39661.7	39231.4	29411.5
													1008.03	23082.5	40639.8	39716.9	39192.5	29408.1
													1009.78	23074.9	40641.8	39804.4	39103.4	29392.2
													1011.53	23067.5	40717.5	39789.3	39092	29359.8
													1013.27	23080.2	40839.3	39832.4	39055.5	29302
													1015.02	23121.2	40870.3	39876.3	39060.8	29197.7
													1016.76	23150.9	40869.7	39979.7	39104.2	29107.9
													1018.5	23233.5	40934.2	40055.3	39177.1	29080.4
													1020.25	23271.8	41079.4	40182.6	39258.6	29027.6
													1021.99	23352.3	41154.2	40289.1	39361.1	29043.8
													1023.73	23438.1	41260.9	40346.1	39462.5	29107.8
													1025.48	23464.1	41323.3	40398.9	39526.2	29178
													1027.22	23460.2	41358.6	40511.2	39592.5	29236.8
													1028.96	23435.2	41387.7	40585.4	39633.1	29268.3
													1030.7	23468.2	41428.7	40709.1	39632	29287.7
													1032.44	23475	41535.2	40787.3	39661.9	29341.1
													1034.18	23493	41691.2	40915	39764.6	29353.6
													1035.92	23575.9	41907.2	40984.8	39915.2	29410.1
													1037.66	23643.3	42123.1	40984	39987.6	29404.8
													1039.4	23760.4	42284.3	41145.9	40105.2	29461.7
													1041.14	23845.4	42409.2	41334.7	40239.6	29590
													1042.88	23951	42519	41461.3	40407.9	29726.7
													1044.62	24166.8	42686.4	41629.1	40532	29922.6
													1046.36	24346.3	42855.7	41825.6	40632.3	30143.1
													1048.1	24421.1	42957.5	41970.5	40777.9	30203.5
													1049.83	24560	43116	42114.8	40937.6	30228.4
													1051.57	24582.8	43229.4	42214.6	41038.8	30238.8
													1053.3	24642.5	43359.3	42322.1	41139.4	30274.3
													1055.04	24661.7	43438.4	42424.6	41242.9	30324.9
													1056.78	24719	43519.6	42518	41374	30354.3
													1058.51	24847.4	43699.7	42646.4	41503.4	30470.6
													1060.25	24953.7	43915.9	42823	41614.6	30551.2
													1061.98	25046.2	44073.4	43030.7	41708.7	30579.7
													1063.71	25227.7	44244	43272.6	41859.7	30636
													1065.45	25354.7	44470.5	43498.3	42068.1	30789.6
													1067.18	25426.2	44608.2	43644.7	42193.8	30930.8
													1068.91	25560	44727	43770.2	42317.5	30996.6
													1070.65	25697.9	44908.1	43829.9	42342.1	31019.9
													1072.38	25764	45067	43905.8	42447.1	31116.2
													1074.11	25848.1	45228.2	44012.8	42538.3	31119.2
													1075.84	26022.6	45372.6	44172.6	42650	31167.7
													1077.57	26113.1	45472.3	44301.7	42799.3	31202.2
													1079.3	26199	45705.3	44460.2	42950.8	31372.8
													1081.03	26248.9	45855.3	44609.9	43001.7	31469
													1082.76	26371.3	46025.2	44732.5	43085.3	31489.2
													1084.49	26431	46202.9	44785.9	43162.4	31539.1
													1086.22	26420.8	46360.1	44878	43348.7	31594.2
													1087.95	26459.3	46496.1	44995.7	43603.3	31617.7
													1089.67	26524.6	46616.8	45107	43772.5	31626.7
													1091.4	26494	46629.8	45331.5	43862.9	31701.5
													1093.13	26559.7	46792.9	45506.6	43937.4	31838.5
													1094.86	26621.6	46929.8	45621.1	43967.2	31861.6
													1096.58	26749.7	47084.1	45816.7	44039.6	31932.9
													1098.31	26874.2	47190.4	45965.5	44079.5	31962.9
													1100.03	26991.9	47389.8	46068.2	44205.1	32027.2
													1101.76	27122.3	47579.2	46138.7	44390.9	32125.3
													1103.48	27206.6	47672.1	46200.2	44473.1	32132.6
													1105.21	27276.7	47655.5	46375.1	44541.2	32271.7
													1106.93	27358.6	47812.5	46424.5	44700.9	32383.4
													1108.66	27422.5	47974.8	46491.7	44825.1	32418.2
													1110.38	27474.9	48189	46658.2	44892.5	32527.6
													1112.1	27536.4	48281.8	46800.2	44979.2	32522.8
													1113.82	27596.1	48536.3	46864.5	45068.9	32633.8
													1115.55	27735	48787.6	46904.3	45172.9	32744
													1117.27	27842.1	48947.9	47041.5	45224	32855.7
													1118.99	27975.2	49055.3	47125.6	45278.2	32978.7
													1120.71	28089.2	49151.7	47264.4	45456.4	33042.8
													1122.43	28274.5	49210.3	47472.8	45546.6	33114.4
													1124.15	28385.2	49300.8	47622.9	45607	33204.1
													1125.87	28518.7	49297.7	47840.3	45841.7	33223
													1127.59	28664.2	49327.7	47951.6	45967.1	33297.7
													1129.31	28843	49444.9	48087.5	46119.6	33411.2
													1131.03	28992.4	49631.6	48269.5	46182.1	33536.2
													1132.75	29094.5	49784.5	48326.1	46251	33614.8
													1134.46	29197.4	49950.4	48482.1	46417.2	33739.7
													1136.18	29321.8	50146.1	48609.6	46480.3	33811.6
													1137.9	29412.5	50354.8	48745.2	46596.9	33873.4
													1139.62	29527.2	50428.3	48937.1	46802.1	34011.2
													1141.33	29642	50499.2	49068.5	46983.1	34125.2
													1143.05	29797.5	50677	49272.5	47117	34247.1
													1144.76	29939.7	50851	49346.3	47153.6	34445.1
													1146.48	30082.4	51011.3	49424.1	47150.9	34730.2
													1148.19	30252.2	51306.2	49523.1	47341	35031.8
													1149.91	30403.5	51546.4	49611.9	47435.7	35194.8
													1151.62	30545.9	51776.7	49753.6	47611.1	35388.1
													1153.33	30716.6	51921.2	49972.8	47860	35527.7
													1155.05	30900.5	52217.2	50269.7	48231.7	35662.1
													1156.76	31154.3	52583.6	50560.9	48450.5	35807.4
													1158.47	31442	52904.4	50787.3	48653.4	36044.8
													1160.18	31808.7	53281.8	51097.3	48882.3	36359.1
													1161.89	32185.1	53724.2	51380.3	49221.9	36660.2
													1163.61	32487.2	54081.8	51619.2	49497.3	36974.5
													1165.32	32774.7	54386.3	51922.1	49763.9	37329.7
													1167.03	33016.4	54582.7	52227	49989.5	37558.4
													1168.74	33153.1	54707.4	52401.7	50172.6	37775.9
													1170.45	33169.2	54741.6	52554.1	50259.9	37820.5
													1172.16	33186.1	54633	52620.6	50318	37697.4
													1173.87	33095.3	54608.8	52623.8	50348.2	37467.1
													1175.57	32921.9	54663.1	52595.6	50310.4	37265
													1177.28	32751.8	54673.8	52538.9	50312.7	37073.7
													1178.99	32646.6	54774.4	52588.9	50247.6	37028.8
													1180.7	32544.2	54947.6	52523.9	50231.1	37044.8
													1182.4	32449.4	54998.3	52452.3	50127.3	37111.5
													1184.11	32383.2	54896.1	52517.3	50128.3	37173.7
													1185.82	32431.3	54901.6	52548.5	50192.1	37203.3
													1187.52	32402.3	54963.3	52578.2	50182.8	37182.5
													1189.23	32432	55056.4	52680.5	50148.1	37111.1
													1190.93	32498.2	55095	52784.1	50194.4	36948.9
													1192.64	32558.3	55208.2	52914.3	50309.8	36853.9
													1194.34	32594.7	55316.3	52882.9	50488.7	36787.1
													1196.04	32612.7	55288.8	52953.1	50558.7	36750
													1197.75	32601	55249.7	53073.2	50584.4	36756.1
													1199.45	32639.1	55358.2	53179.1	50717.4	36826
													1201.15	32641.9	55384.4	53234.1	50681.9	36921.5
													1202.86	32746.8	55500.9	53306.7	50680.6	36993.5
													1204.56	32795.2	55686.3	53434.2	50681.1	37043.8
													1206.26	32925.2	55805.6	53499.9	50786.3	37137.9
													1207.96	32973	55917	53477.9	50858.7	37159.1
													1209.66	33011.9	56011.1	53543.7	50985.9	37155.5
													1211.36	33040.9	56090.1	53578.3	51091.5	37064.6
													1213.06	33074.7	56190.8	53608.7	51307.4	37078.9
													1214.76	33077.5	56233.2	53606.6	51330	37172.5
													1216.46	33185.8	56316.4	53614.3	51377.9	37342.7
													1218.16	33255.4	56425.5	53701.5	51397.6	37463.7
													1219.86	33418.7	56493.7	53738.3	51405.2	37644.6
													1221.56	33571.7	56555.3	53834.7	51353.5	37763
													1223.25	33766.2	56610.5	54045.3	51470.9	37889.7
													1224.95	33973.2	56625.2	54167.2	51510.1	37866.3
													1226.65	34130.9	56835.5	54334.8	51629.5	37900.2
													1228.35	34221.9	57030.6	54560.7	51705.9	38009.5
													1230.04	34360	57141.2	54730.2	51820.1	38142.3
													1231.74	34444.2	57317.1	54889.7	51964.1	38289.3
													1233.43	34606.5	57559.8	54969.9	52076.4	38446.6
													1235.13	34785.6	57716.8	55081.8	52198.9	38655.8
													1236.82	34933.1	57796.1	55284	52434.6	38847.8
													1238.52	35108.3	57865.2	55309	52455	38883.5
													1240.21	35215.3	58104.7	55318.8	52573.9	38928.1
													1241.9	35280.5	58191.5	55419.3	52682	38974.8
													1243.6	35327	58252.6	55490.2	52734.5	38979.5
													1245.29	35334.8	58363.9	55553.9	52748.2	39030.3
													1246.98	35392.5	58491.7	55530.5	52808.8	38998.4
													1248.67	35393.6	58495.5	55552.9	52827	39037.4
													1250.37	35378	58515.9	55702	52849.5	39148.9
													1252.06	35389.9	58494.4	55773.6	52790	39186.9
													1253.75	35425.9	58559.2	55789.9	52786.4	39211
													1255.44	35491.5	58600.2	55936.6	52829.1	39225
													1257.13	35548.5	58763.5	56116.2	52902.2	39254.9
													1258.82	35689.2	58979.5	56204.1	52975	39306.8
													1260.51	35838.4	59098.9	56291.8	53164.3	39256.1
													1262.2	35990.6	59304.3	56430.6	53389.4	39317.1
													1263.88	36210.7	59497.6	56644.8	53609.3	39531.9
													1265.57	36394.9	59632	56888.8	53834.8	39730.1
													1267.26	36665.6	59812.2	57049.5	54085.1	39894
													1268.95	36850.2	59925.1	57239.4	54278.8	40082.2
													1270.64	37012.5	60133.4	57456.8	54494.2	40297.2
													1272.32	37225.1	60405.8	57593.9	54638.2	40519.6
													1274.01	37270	60476.3	57713	54745	40612.2
													1275.7	37315.9	60642.1	57848.8	54784.7	40690.6
													1277.38	37365.8	60757.7	57940.8	54839.3	40790.4
													1279.07	37340.7	60901	57925.9	54913.2	40806
													1280.75	37396.1	61036.2	57961.3	54984.2	40755.2
													1282.44	37392.1	61049.9	58055	55051.5	40737.6
													1284.12	37401.4	61178.6	58194.8	55201.9	40740.9
													1285.8	37486.2	61335.8	58388.9	55421.2	40848.9
													1287.49	37557.2	61420.1	58605	55533.2	41033.7
													1289.17	37730.7	61491.9	58812.3	55618.3	41232.1
													1290.85	37889.4	61682.2	58962.2	55763.9	41513.9
													1292.53	38121.8	61881.7	59043.1	55916.5	41757
													1294.21	38368.7	62027.5	59270.7	55992.7	42042.2
													1295.9	38555.3	62166.2	59459.6	56130.2	42293.2
													1297.58	38664.4	62300.5	59504.1	56219.8	42443.2
													1299.26	38798.4	62398	59570.6	56380.3	42538.5
													1300.94	38896.3	62548.9	59623.8	56470.6	42670.9
													1302.62	39022.9	62665.5	59572.6	56568.1	42689.8
													1304.3	39101.8	62843.7	59591.7	56686.8	42667.9
													1305.98	39312.9	63009	59666.4	56876.5	42740.2
													1307.66	39591.5	63136.3	59915.6	56996.9	42825
													1309.34	39917.6	63268.4	60145.3	57098.6	42968.3
													1311.01	40304.6	63424.7	60375.2	57187.4	43195.4
													1312.69	40757.5	63520	60606.1	57282	43404.7
													1314.37	41101.4	63743.4	60815.6	57351.1	43738.9
													1316.04	41533.2	63951.8	60898.5	57420	44042.8
													1317.72	41868.2	64183	61024.1	57540.2	44432.9
													1319.4	42233.8	64521	61109.7	57742.2	44939.8
													1321.07	42518.6	64838.2	61270.2	57948.3	45392.2
													1322.75	42817.6	65055.1	61363.6	58094.7	45811.5
													1324.42	42992.4	65248	61551.4	58206.1	46091.1
													1326.1	43035.4	65292.7	61596.1	58168.5	46194.1
													1327.77	43024.6	65425.3	61654	58138.4	46187.3
													1329.45	43033.4	65458.8	61671.1	58121.1	46106.6
													1331.12	42906.4	65439.3	61729.8	58154.5	46024
													1332.79	42802.1	65373.3	61662.9	58166.7	45881.2
													1334.47	42535.2	65240.1	61531.1	58070.5	45612
													1336.14	42251.5	64960.7	61447.3	57889.9	45272.8
													1337.81	41810.5	64613.5	61291.2	57596.5	44745.6
													1339.48	41344.1	64219	60997.4	57247.7	44110.7
													1341.15	40840.6	63867.7	60767	56970.4	43465.5
													1342.83	40360.1	63538.3	60533.5	56816.9	42848.3
													1344.5	40001.7	63319.9	60262.8	56683.4	42330.8
													1346.17	39695.1	63152	59939.8	56469.2	41918.9
													1347.84	39413.9	63015.9	59732.7	56187.5	41644.6
													1349.51	39237.9	62937.3	59669.5	56032.9	41482.6
													1351.18	39068.1	62920	59542.2	55887	41424.6
													1352.84	38965.4	62941	59499.8	55837.5	41339.3
													1354.51	38805	62907.8	59595.3	55830.7	41295
													1356.18	38761.4	62949.7	59730.1	55951.1	41165
													1357.85	38780.3	63035.1	59781.1	56009.9	41064.9
													1359.52	38727.7	63048.6	59753.5	56084	41012.4
													1361.18	38701.8	62992.7	59784.8	56004.7	40920.2
													1362.85	38636	63029.8	59866.2	55975.6	40873.8
													1364.52	38553.6	63103.4	59790.6	55957	40944
													1366.18	38585.6	63258.1	59723.2	55911.6	40959.3
													1367.85	38689.3	63303.2	59770.6	55849.3	40991.5
													1369.51	38829.9	63227.7	59871.9	55917.3	40992
													1371.18	38944.4	63190.4	59936	56013.6	41036.4
													1372.84	39000.7	63109.4	59945.1	56160.5	41107
													1374.5	39062.3	63055.3	60045.5	56220.8	41037.5
													1376.17	39047.5	63118.6	60161.3	56250	41164.1
													1377.83	39090.9	63217.3	60190.8	56333.6	41217.5
													1379.49	39159	63260.9	60251.5	56338.7	41265.3
													1381.16	39265.8	63319.1	60300	56305.4	41308.3
													1382.82	39375.7	63339.5	60351	56352.6	41309.8
													1384.48	39418.6	63457.3	60294.6	56362.4	41340.6
													1386.14	39454.2	63561.2	60155.1	56384.9	41349.2
													1387.8	39527.1	63582.9	60115.8	56447.9	41289.5
													1389.46	39491.3	63743.1	60116.2	56412.8	41403.3
													1391.12	39569.6	63763.6	60243.7	56500.5	41429.3
													1392.78	39614	63736	60451.4	56562	41465.9
													1394.44	39672.6	63848.5	60588.3	56512	41492.3
													1396.1	39712.4	63934.7	60758.6	56574.4	41535.8
													1397.76	39737.9	64016.6	60839.4	56638.5	41634.5
													1399.42	39785.4	64044	60821.2	56705.4	41642.6
													1401.08	39809.8	64006.3	60862.4	56769.9	41606
													1402.74	39698.7	64062.1	60908.4	56763	41678.3
													1404.39	39811.2	64129.9	60984.2	56796.1	41685.8
													1406.05	39864.5	64226.4	61041.5	56789.4	41611.9
													1407.71	39909.6	64302.7	60934.6	56680.7	41601.9
													1409.36	39899.7	64407.7	60908.2	56703.1	41724.5
													1411.02	39990.7	64475	60972.4	56824.6	41867.3
													1412.67	40084.8	64416.3	61014	56963.5	41929.8
													1414.33	40182.8	64447.3	61076.1	57095.9	42010.9
													1415.98	40181.8	64465.4	61145.3	57096	42045.6
													1417.64	40298.9	64597.9	61265.3	57143.3	42067.1
													1419.29	40391.1	64718.2	61284.8	57249.5	41998.5
													1420.95	40459.6	64762.5	61203.4	57316	42008
													1422.6	40511.3	64807.2	61235.6	57397.2	42011.1
													1424.25	40566.5	64779.2	61324.7	57540.1	42033
													1425.91	40635.5	64702.5	61428.9	57591.1	42102.7
													1427.56	40727.1	64793.8	61526.1	57642.9	42230.2
													1429.21	40821.5	64834.1	61644.4	57502.3	42363.2
													1430.86	41003.4	64878.4	61724.3	57440.7	42577.9
													1432.51	41199.5	65054.7	61675.2	57497.5	42786.9
													1434.16	41393.4	65166	61584.4	57542.5	43036.7
													1435.81	41655.5	65270.3	61604.3	57654.8	43188
													1437.46	41906.6	65352.6	61638.6	57730.7	43356.5
													1439.11	42184.7	65470.1	61780	57868.8	43543.5
													1440.76	42461.4	65668.1	61927.4	57983	43830.2
													1442.41	42799.6	65752.4	62153.2	57989.9	44181.1
													1444.06	43119.4	65845	62233.7	58066.2	44499.9
													1445.71	43338.1	65964.8	62273.5	58212.5	44915.9
													1447.36	43537.9	66056.7	62380.9	58301.8	45256.8
													1449	43686	66146.8	62545.8	58503	45517.5
													1450.65	43845.6	66214.4	62707.5	58633	45624.2
													1452.3	43878.1	66307.4	62805.7	58776.9	45629.8
													1453.95	43863.6	66413.6	62793.9	58910	45631
													1455.59	43703.7	66333.4	62649.7	58869	45530.2
													1457.24	43436.9	66082.9	62360.8	58747	45276.6
													1458.88	43151.9	65819.3	62119.9	58504.3	44992.1
													1460.53	42839.3	65544.9	61955.5	58247.2	44648.4
													1462.17	42504.1	65338.5	61798.9	57997.2	44264.6
													1463.82	42269	65145.8	61667.7	57728.4	43914
													1465.46	42084.4	65047.9	61596.9	57570.7	43590.1
													1467.1	41961.9	65025.3	61530.8	57541.3	43421.5
													1468.75	41827.1	64927.1	61535.8	57439.2	43303.8
													1470.39	41756.9	64777	61485.9	57431.8	43264
													1472.03	41825.1	64840.8	61560.1	57464.1	43302.5
													1473.67	42055.5	64968.9	61605.8	57553.7	43535.9
													1475.31	42302.8	65132.9	61610.5	57621.1	43635.5
													1476.96	42584.4	65331.5	61698.4	57690.7	43939.7
													1478.6	42908.8	65616.2	61966.6	58010.7	44316.9
													1480.24	43127.8	65873.3	62280.3	58280.2	44679.2
													1481.88	43386.3	66118.3	62650.1	58554.1	45000
													1483.52	43680.1	66337.9	62959.3	58813.1	45382.8
													1485.16	44006.3	66587	63163.5	59047.1	45719.1
													1486.8	44394.7	66786.5	63366.3	59230.6	46006.7
													1488.44	44701.6	66920.6	63345.2	59338.6	46177.2
													1490.07	45013.5	67114.6	63392	59433.5	46490.8
													1491.71	45251.1	67347.8	63599.3	59612.7	46833.9
													1493.35	45430.7	67590.6	63792.1	59743.4	47118.8
													1494.99	45660	67826.8	64018.5	59877.4	47407.4
													1496.62	45976.1	68051.7	64272.1	60012.8	47772.3
													1498.26	46165.1	68114.1	64380.1	60160.1	47968.1
													1499.9	46377.3	68145	64504.7	60252.7	48105.7
													1501.54	46529.1	68192.8	64461.7	60294.9	48176.3
													1503.17	46531.4	68177.6	64401.7	60303.4	48141.7
													1504.8	46462.4	68049.4	64308.9	60161	47936.6
													1506.44	46279.9	67944	64177.1	60010.9	47573.3
													1508.07	46013.5	67687.7	64047.4	59866.4	47248.4
													1509.71	45708.3	67331.9	63840.8	59663.4	46921.8
													1511.34	45327.2	66886.2	63585.6	59456.7	46572.6
													1512.98	45122.9	66686.7	63288.1	59394.3	46283.7
													1514.61	44890.4	66552.6	63106.3	59292.4	45973
													1516.24	44612	66407.3	62930.5	59086.7	45653
													1517.88	44488.1	66277.5	62724	58884.5	45376.6
													1519.51	44254	66159.2	62619.3	58613.7	45096.8
													1521.14	43994	66015.1	62547.8	58392.7	45026.4
													1522.77	43736.1	65869.8	62472.9	58172.7	44948.7
													1524.4	43532.6	65751	62342.6	58088.2	44918.2
													1526.03	43507.8	65744.7	62250.8	58188.8	44892.8
													1527.66	43418.9	65715.8	62195.6	58208.5	44756.2
													1529.29	43382.8	65677	62174.4	58227	44641.3
													1530.92	43444	65641.2	62147.7	58200.5	44646.5
													1532.55	43498.5	65592.3	62207.7	58144	44715.3
													1534.18	43565.4	65575.7	62349	58039.8	44758.3
													1535.81	43607.7	65536	62444.2	57954.8	44840.5
													1537.44	43715.3	65486.6	62370.7	57971.1	44895.5
													1539.06	43824.4	65489.5	62339.2	57952.2	44942.1
													1540.69	43789.7	65453.9	62234.6	57939.2	44909.3
													1542.32	43702.5	65411.5	62120.8	57928.9	44916.4
													1543.95	43634.4	65362.7	62045.2	57862.5	44862.6
													1545.57	43572	65401.1	62086.7	57860.1	44808.3
													1547.2	43510.3	65324.1	62152.7	57775.5	44661.9
													1548.82	43374.4	65251.1	62112.9	57704.2	44525.1
													1550.45	43288.2	65178.4	61997.2	57632	44380.2
													1552.07	43229	65134.6	61930.3	57580.1	44251.9
													1553.7	43048.4	65011.2	61827	57472.6	44126.7
													1555.32	42925.7	64881.7	61561.1	57231.9	43867.2
													1556.95	42757.9	64739.1	61380.3	57025.3	43593.9
													1558.57	42575	64544.9	61247.8	56723.1	43307.5
													1560.19	42317.6	64280.1	61131.9	56525.8	43020.6
													1561.82	42007.6	64089.4	60960	56398.3	42749.8
													1563.44	41677.2	63967.4	60840.8	56326	42577
													1565.06	41504.4	63856.9	60725.8	56307.3	42523.4
													1566.68	41341.7	63761.1	60650	56305.2	42486.6
													1568.3	41338.8	63637.8	60354.1	56254.7	42361
													1569.93	41247.3	63574	60194.8	56115.6	42251.6
													1571.55	41210.4	63439.1	60065.3	55927.9	42122.9
													1573.17	41054.5	63264.1	60017.2	55796.8	41969.1
													1574.79	40887.1	63185	60002.5	55721.9	41827.4
													1576.41	40682.5	63214.3	59996	55641.9	41701.6
													1578.03	40622	63077.9	60013.6	55563.5	41696.8
													1579.64	40676.8	62958.6	60006.8	55568.3	41717.1
													1581.26	40652	62817.4	59861.9	55511	41614
													1582.88	40736.3	62815.6	59753	55430.3	41532.3
													1584.5	40795.5	62864.4	59665.2	55413.1	41506.5
													1586.12	40819.7	62740.6	59522.5	55395.5	41453.9
													1587.73	40845.8	62722	59542.8	55373.4	41467
													1589.35	40900.5	62707.4	59640.5	55428.8	41546.1
													1590.97	41011.2	62544.8	59745	55533.7	41676.3
													1592.58	41213.1	62556	59872.2	55577.5	41887.1
													1594.2	41362.9	62648	60017.9	55614.1	42084.6
													1595.81	41751.2	62846.2	60182.8	55797.5	42494.9
													1597.43	42254.7	63245.1	60357.1	55989.2	43077.3
													1599.04	42940.6	63653.9	60553.2	56315.7	43738.7
													1600.66	43774.8	64203.5	61087.7	56711.4	44580.2
													1602.27	44852	64815.5	61693.6	57248.5	45615.5
													1603.89	45970.1	65398	62330.3	57845.8	46753.9
													1605.5	47075.4	66193.6	63126.4	58542.7	47934.1
													1607.11	48073.2	67029.8	63977.2	59319.4	49111.1
													1608.73	48971.3	67767.9	64707.6	60060.8	50174.8
													1610.34	49615.9	68476.3	65220	60590.1	50976.8
													1611.95	49827.6	68924.6	65497	60882.6	51261.9
													1613.56	49596.9	69024.4	65543	60942.1	51164.6
													1615.17	49099.2	68750.5	65118.3	60604.4	50543.6
													1616.79	48180.4	68078.4	64507.3	60101.3	49465
													1618.39	47027.5	67307.1	63756.9	59419.4	48143.1
													1620.01	45834.8	66338.5	62905.4	58664.7	46726.2
													1621.62	44787	65467.5	62147.1	57947.9	45348.4
													1623.22	43838.4	64691.6	61473.2	57217.7	44164.8
													1624.83	43005.4	64052.1	60898.6	56607.5	43221.9
													1626.44	42377.8	63514.1	60444.6	56137.8	42524.4
													1628.05	41891	63029.3	59978.9	55618.8	41845.7
													1629.66	41316.9	62668.1	59689.1	55309.5	41261.3
													1631.27	40859.9	62349	59327.7	54978.1	40835
													1632.88	40401.4	61950.3	59003.4	54693.6	40410.3
													1634.48	40018.2	61738.4	58833.9	54401.1	40016.4
													1636.09	39758.1	61431.3	58569.1	54065.7	39620.4
													1637.7	39508.6	61064	58404	53858.5	39339.8
													1639.3	39309.5	60692.6	58268.2	53672.1	39051.3
													1640.91	39134.8	60407.9	58073.5	53426.6	38787.6
													1642.51	38867.1	60304.5	57900.8	53222.5	38613.1
													1644.12	38646.9	60122.2	57628.3	53038.5	38436
													1645.72	38423	59974.8	57537.8	52823.7	38240.9
													1647.33	38275.2	59905.1	57445.8	52554.6	38071.9
													1648.93	38189.5	59774.4	57335.6	52310.9	37818.9
													1650.53	38104.8	59654.3	57294.4	52276.7	37730.6
													1652.14	37968.4	59473.4	57280.1	52260.6	37665.7
													1653.74	37897.8	59434	57214.5	52187.6	37628.9
													1655.34	37813.8	59370.8	57028.6	51991.5	37545.2
													1656.94	37733.6	59182.4	56851.8	51941.8	37418.9
													1658.55	37652.7	58955.8	56744.2	51848	37311.6
													1660.15	37723.5	58718.2	56609.4	51721.5	37167.5
													1661.75	37656.2	58543	56507	51671.4	36973.3
													1663.35	37605.8	58464.2	56374.8	51629.5	36851.6
													1664.95	37481.8	58256.1	56230.8	51542	36788.1
													1666.55	37427.8	58208.2	56130.2	51374.6	36722.4
													1668.15	37329.5	58079.4	55912.6	51145.7	36532.6
													1669.75	37258.7	57961.1	55800.8	51032.3	36511
													1671.35	37108	57830.8	55732.9	50843.9	36414.1
													1672.95	37053.9	57753	55753.2	50660.7	36314.1
													1674.55	36830.9	57647.9	55692.6	50558	36280.6
													1676.14	36627.8	57538.5	55659.4	50338.2	36114.8
													1677.74	36499.4	57375.9	55569.4	50297.1	35961
													1679.34	36455.8	57285.8	55480.2	50163.4	35784.6
													1680.94	36290.8	57158.8	55282.2	50025	35649.4
													1682.53	36259.6	56922.4	55172.8	49960.5	35653.8
													1684.13	36163.7	56780.3	55132.1	49864.2	35590.7
													1685.72	36063.3	56661.5	55013.2	49813.3	35603.1
													1687.32	36009	56554.3	54820.7	49783.8	35576
													1688.92	35877.5	56493.6	54694.5	49671.2	35409
													1690.51	35803.5	56407.4	54622.2	49604.8	35195.9
													1692.11	35776	56335.6	54447.4	49488.6	35039.1
													1693.7	35680.8	56269.8	54347.9	49353.8	35022.2
													1695.29	35654.8	56149	54302	49276.7	34992.1
													1696.89	35601.7	56048.7	54244.1	49186.9	34975.3
													1698.48	35564.4	55975.7	54143.6	49172.4	34945.7
													1700.07	35564.8	55976.2	54095.4	49172.4	34867.6
													1701.67	35455.9	55912.6	54032	49091	34794.6
													1703.26	35381.7	55769.6	54035.1	48967.7	34690.3
													1704.85	35393.4	55640.9	53890.7	49007.4	34646.9
													1706.44	35344.7	55511.7	53858.1	48922.1	34636.1
													1708.03	35300.1	55473.9	53766.4	48810.8	34620
													1709.62	35210.9	55399.4	53634.5	48720.5	34601.5
													1711.21	35164.4	55367.5	53605.8	48680.7	34567
													1712.8	35193.6	55456.3	53659	48676.2	34535.4
													1714.39	35157.6	55429.9	53661.8	48607.4	34551.8
													1715.98	35087.2	55360.7	53680.1	48615.3	34469.7
													1717.57	35078.2	55264.8	53599.3	48689.9	34410
													1719.16	35042.2	55094.8	53542.4	48646.2	34347.3
													1720.75	35020.8	54906.8	53454.7	48611.6	34233.1
													1722.34	34953.9	54763.3	53315.8	48586.7	34147.1
													1723.93	34967.3	54707	53234.2	48512.1	34068.3
													1725.51	34965.9	54806	53269.5	48445	34048.2
													1727.1	34873	54795.7	53261.4	48339.8	34091.4
													1728.69	34793.6	54804.8	53199.5	48254.2	34056.8
													1730.28	34766.2	54807.6	53171.2	48153.3	34102
													1731.86	34672.1	54780.4	53092.3	48056.4	34100.9
													1733.45	34672.7	54740.3	53038.2	47991.7	34123.2
													1735.03	34641	54744.7	52934.8	47939	34135.9
													1736.62	34591.6	54699.9	52847.2	47824.7	34061.6
													1738.2	34531.6	54618.1	52775.3	47764.1	34051.2
													1739.79	34496.6	54424.3	52710.3	47670.6	34001.1
													1741.37	34528.5	54288.1	52598.3	47580.8	33950.7
													1742.95	34613.2	54245.8	52649	47547.1	33897.8
													1744.54	34584.4	54210.1	52637.4	47519.3	33822.6
													1746.12	34574.1	54182.6	52608.9	47482.4	33753.8
													1747.7	34448.3	54169.2	52606	47468.5	33642.7
													1749.29	34296.5	54083.4	52550.6	47382.9	33543.8
													1750.87	34184.9	53970.8	52378.2	47402	33502.1
													1752.45	34091.6	53930.3	52253.7	47352.2	33460.2
													1754.03	34107.7	53925.8	52136.5	47360.6	33483.2
													1755.61	34182.7	53961.4	52103.3	47291.8	33426.7
													1757.19	34145.2	53822.4	52097.2	47190.7	33415
													1758.77	34062.8	53580.3	52109.9	47030.7	33359.1
													1760.35	33984.4	53460.5	52116.5	46966.9	33292.5
													1761.93	33946.5	53351.9	52085.1	46807.7	33236.3
													1763.51	33857.8	53232.8	52004	46806.2	33175.5
													1765.09	33819.9	53208.2	51992.8	46751.1	33147.9
													1766.67	33875.8	53294.6	51917.7	46728.9	33112.7
													1768.25	33835.6	53280.2	51789.7	46646.9	33007.4
													1769.83	33778.4	53169.9	51777.2	46524.7	32940.5
													1771.4	33641.3	53024.8	51621.1	46393.5	32881.9
													1772.98	33603.5	52940.6	51437	46318.9	32816.9
													1774.56	33585.2	52747	51323.6	46228.8	32804
													1776.13	33554.8	52564.9	51179	46227.8	32823.4
													1777.71	33574.5	52447.8	51103	46176.1	32827.8
													1779.29	33583	52388.4	51056.2	46168.7	32819.2
													1780.86	33546	52285.1	51082.7	46152.6	32757.3
													1782.44	33521.4	52281.5	51059.6	45999.1	32685.1
													1784.01	33326.1	52182.8	50961	45815.4	32533.4
													1785.59	33214.6	52040	50808.5	45631.2	32390
													1787.16	33067.9	51837.5	50672.6	45564.8	32239.6
													1788.73	33033.7	51687.8	50430.6	45476.3	32211.9
													1790.31	32954.9	51616.7	50248.2	45424.4	32133.5
													1791.88	32917.9	51415.1	50171.7	45401.6	32104.3
													1793.45	32896.6	51377.5	50162.2	45358.1	32162.2
													1795.03	32877.5	51373.9	50075.2	45233.7	32175.4
													1796.6	32758.9	51278.4	50048.5	45121.4	32042.2
													1798.17	32742.5	51171.3	49941.5	44997.8	31984.5
													1799.74	32710.5	51022.2	49840.3	44976	31875.3
													1801.31	32686.2	50898.6	49756.7	44851.1	31820.7
													1802.88	32591.3	50843.9	49702.4	44794.9	31718.7
													1804.46	32553.3	50630.3	49727.5	44718.6	31604.6
													1806.03	32421.4	50610.6	49711.2	44638.3	31594
													1807.6	32305.4	50543.2	49649.2	44560.8	31497.2
													1809.16	32191.6	50476.6	49510.3	44454.4	31442.4
													1810.73	32151.1	50314.9	49399.2	44347.3	31451.2
													1812.3	32149.3	50172.7	49208.7	44256.1	31351.8
													1813.87	32128	50166.7	49153.7	44119.2	31312
													1815.44	32080.5	50065	49060.5	44062.2	31269.4
													1817.01	32102.1	49963.5	48996	44015	31247.8
													1818.57	32008.8	50021.7	48868.2	43943.2	31241.7
													1820.14	31920.2	50093.1	48831.3	43843	31221.9
													1821.71	31897.3	50085.4	48708.3	43755.9	31239.8
													1823.28	31880.8	49987.6	48647.4	43713.1	31175
													1824.84	31902.2	49881.9	48601.8	43637	31094.3
													1826.41	31890.9	49781.4	48725.2	43743.5	31048.4
													1827.97	31813.1	49506.4	48724.5	43763.2	30949.5
													1829.54	31767.4	49380	48636.4	43791.7	30928.1
													1831.1	31629	49284.9	48591.1	43700.2	30784.2
													1832.67	31509.4	49242.1	48587.1	43531.4	30711.9
													1834.23	31433.4	49206.7	48493.9	43386.6	30654.9
													1835.79	31421.8	49166.6	48417.2	43238.8	30594.7
													1837.36	31379.2	49063.1	48389.8	43149.4	30629.4
													1838.92	31371.4	49066.9	48469	43216.8	30629.6
													1840.48	31402	48961.9	48410.7	43159.2	30669.6
													1842.05	31454.6	48921.9	48305.6	43174.5	30687.5
													1843.61	31475.3	48888.8	48219.6	43131	30662.5
													1845.17	31479.4	48846.2	48154.4	43055.2	30674.5
													1846.73	31416.5	48778.8	48021.4	42943.1	30660.4
													1848.29	31332.4	48672.1	47929.2	42872.1	30625.5
													1849.86	31196	48564.4	47840	42880.7	30562.3
													1851.42	31133.7	48517.2	47748.9	42878.6	30510.5
													1852.98	31079.4	48413.7	47660.2	42895.6	30429.2
													1854.54	31106.9	48344.9	47595.2	42873.3	30356.5
													1856.1	31194.4	48299.3	47649.2	42834.3	30314.6
													1857.65	31244.4	48286.8	47708.9	42722.6	30281.1
													1859.21	31205.5	48222.5	47662.9	42528.6	30230.3
													1860.77	31136.8	48095.7	47553.3	42446.4	30155.7
													1862.33	31046.3	48049.2	47427.4	42372.6	30189.7
													1863.89	30982.1	47943.6	47301.2	42299.7	30238.6
													1865.45	30862.5	47864.8	47204.1	42294.5	30189.2
													1867	30824.8	47788.9	47138.8	42261.1	30167.6
													1868.56	30819.9	47730.4	47201.1	42252.2	30111.4
													1870.12	30778.9	47763.7	47224.9	42211.2	30049.9

## Sheet: Figure 3
Figure 3A	Bare	Coated					Figure 3E	Distance distribution	Relative Frequency (%)
	29.2	47.4						0.6	11.3208
	31.7	45.5						0.9	22.6415
	30.2	46.4						1.2	20.7547
	36	52						1.5	16.9811
	31	52						1.8	7.54717
	30	53						2.1	11.3208
	31	51						2.4	3.77358
	31	52						2.7	1.88679
	31	51						3	0
	30.4	54.3						3.3	1.88679
	31.6	55.5						3.6	1.88679
	32.6	52.9
	27.4	54.3
	33	35.1
	31.2	35.4
	29.5	35.7
	28.8	51.5
	28.7	49.6
	28.7	52.4
	27	52.1
	30.9	50.8
	26.6	46.5
	30.8	38.6
	22.1	46
	23.1	46.2
	29.9	39
	29.8	32
	27.7	33.6
		32.6
		36.7

## Sheet: Thickness of Bilayer
	Thickness (nm)
	2.97
	3.19333
	3.4
	3.635
	3.66
	3.74333
	3.79333
	3.86
	3.875
	3.97
	4.00167
	4.02
	4.075
	4.18833
	4.36833
	4.39833
	4.60667
	4.67429
	4.88333
	4.925

## Sheet: Figure 4
Figure 4A	Wavenumber	Control	3.5 µM Aß	1.75 µM Aß	875 nM Aß	218 nM Aß	109 nM Aß		Figure 4B	Wavenumber	Control	3.5 µM Aß	1.75 µM Aß	875 nM Aß	218 nM Aß	109 nM Aß		Figure 4C	Control	3.5 µM	1.75 µM	875 nM	218 nM	109 nM
	1700.41	0.0159904	0.0606401	0.0464128	0.0591231	0.0432139	0.0103962			1679.59	0.0494449	0.091839	0.102729	0.0748068	0.0489671	0.0270703			1.13529	2.33496	2.48249	1.6508	1.63388	1.89313
	1698.81	0.032284	0.0844395	0.0458061	0.0351653	0.01123	0.0444988			1677.99	0.0552147	0.0871826	0.105704	0.0895314	0.0523045	0.0387989			1.11428	3.01162	2.17832	2.33828	1.74834	1.01061
	1697.21	0.0198868	0.0735583	0.0652547	0.04916	0.0461427	0.0375123			1676.39	0.0774041	0.0824156	0.109491	0.0862649	0.0550839	0.0510144			1.25029	2.37193	2.28743	1.87399	1.75027	1.55507
	1695.61	0.034147	0.0813245	0.0611932	0.0376066	0.0351363	0.03177			1674.78	0.0436236	0.0522077	0.0782033	0.0758493	0.037586	0.0400537			1.22879	3.92558	2.94881	2.17514	1.60341	1.15615
	1694.01	0.0224299	-0.00392783	0.0650092	0.0699733	0.0342516	0.0283368			1673.18	0.0642658	0.124019	0.113879	0.0775847	0.0465709	0.0429285			1.03813	3.16845	1.95413	2.05776	1.77908	1.38715
	1692.41	0.0582948	0.0731265	0.0448938	0.0411901	0.0370688	0.03948			1671.57	0.0676955	0.147163	0.116955	0.0881045	0.0360859	0.0221589			1.06641	3.00536	1.29	2.05776	1.2529	0.752184
	1690.81	0.0320207	0.077637	0.0818569	0.0405391	0.0382877	0.0192018			1669.97	0.0816139	0.0654378	0.125728	0.140373	0.0574141	0.029419			1.19353	2.14648	1.95492	1.85547	1.25856	1.90096
	1689.21	0.00141621	0.0701672	0.0639494	0.0608856	0.0427543	0.02702			1668.36	0.0789769	0.169774	0.101767	0.0897573	0.0516329	0.0409217			1.4553	1.43588	1.5891	1.51208	1.13594	0.936693
	1687.61	0.0336531	0.0790558	0.048101	0.0470703	0.0351045	0.0386801			1666.76	0.0667689	0.142077	0.137645	0.106991	0.0520147	0.0522968			0.645473	1.53838	2.60911	2.48375	1.1113	0.859636
	1686	0.0249851	0.0359034	0.0990259	0.0573153	0.0264581	0.0369414			1665.15	0.100167	0.174851	0.142331	0.123004	0.0505484	0.040619			0.818999	1.5507	1.49111	1.95464	1.53724	1.57618
	1684.4	0.0492395	0.063202	0.0637664	0.0677267	0.0187544	0.0199211			1663.54	0.112414	0.15734	0.14625	0.148923	0.0714211	0.063423			1.20356	2.47313	2.24744	2.13709	1.61709	1.36895
	1682.8	0.052889	0.0864258	0.0911717	0.0482557	0.0314653	0.0303884			1661.94	0.114545	0.213873	0.152823	0.136436	0.067599	0.0642258			0.959191	1.67817	1.55908	1.74146	1.09029	0.663293
	1681.2	0.0508166	0.077452	0.0829742	0.0396008	0.0390572	0.0189331			1660.33	0.100267	0.180813	0.201244	0.127399	0.0734971	0.0815674			0.521326	1.04069	2.34772	1.65871	1.06743	1.04181
	1679.59	0.0494449	0.091839	0.102729	0.0748068	0.0489671	0.0270703			1658.72	0.0836947	0.200382	0.179047	0.181271	0.0848538	0.0558474			1.29427	0.779431	2.08793	2.08123	0.724562	1.24497
	1677.99	0.0552147	0.0871826	0.105704	0.0895314	0.0523045	0.0387989			1657.12	0.106373	0.211426	0.189119	0.175306	0.0947999	0.0586834			1.06562	2.10677	1.65599	1.28883	0.830026	0.977379
	1676.39	0.0774041	0.0824156	0.109491	0.0862649	0.0550839	0.0510144			1655.51	0.130257	0.209167	0.177039	0.185566	0.109593	0.0996572			1.34998	4.53488	5.29352	1.46781	0.68249	1.10024
	1674.78	0.0436236	0.0522077	0.0782033	0.0758493	0.037586	0.0400537			1653.9	0.10569	0.263592	0.221424	0.202649	0.109773	0.0665109			1.45326	5.447	3.77241	1.20108	0.950927	1.10832
	1673.18	0.0642658	0.124019	0.113879	0.0775847	0.0465709	0.0429285			1652.29	0.133545	0.259087	0.225502	0.207912	0.108061	0.093503			1.18848	5.2392	4.98667	1.565	0.922297	0.894779
	1671.57	0.0676955	0.147163	0.116955	0.0881045	0.0360859	0.0221589			1650.68	0.148392	0.289661	0.224927	0.185919	0.118749	0.113634			1.13834	4.04188	3.52693	2.25029	2.08808	1.10314
	1669.97	0.0816139	0.0654378	0.125728	0.140373	0.0574141	0.029419			1649.07	0.142986	0.289024	0.235873	0.258422	0.115045	0.0809033			1.05248	3.74244	3.97413	3.14011	2.44402	1.06143
	1668.36	0.0789769	0.169774	0.101767	0.0897573	0.0516329	0.0409217			1647.46	0.173343	0.368795	0.256299	0.249089	0.160904	0.102187			1.02144	3.42986	3.51644	3.2296	2.43729	0.79034
	1666.76	0.0667689	0.142077	0.137645	0.106991	0.0520147	0.0522968			1645.85	0.143342	0.380029	0.284781	0.243538	0.165476	0.117743			1.04316	4.6757	2.40938	2.73087	2.26773	0.909624
	1665.15	0.100167	0.174851	0.142331	0.123004	0.0505484	0.040619			1644.24	0.184707	0.398421	0.314592	0.313336	0.175805	0.114583			0.965695	3.47256	3.59393	2.44454	3.42308	0.709245
	1663.54	0.112414	0.15734	0.14625	0.148923	0.0714211	0.063423			1642.63	0.187221	0.479005	0.326305	0.318699	0.216433	0.152561			0.913844	2.92396	3.2404	3.12295	2.21214	0.933841
	1661.94	0.114545	0.213873	0.152823	0.136436	0.067599	0.0642258			1641.02	0.182544	0.477545	0.353682	0.307465	0.235416	0.168957			0.886409	4.3237	2.01703	4.09311	3.05274	0.865747
	1660.33	0.100267	0.180813	0.201244	0.127399	0.0734971	0.0815674			1639.41	0.219678	0.573869	0.431552	0.377472	0.272973	0.187993			1.17219	3.57828	2.09523	2.96123	2.45121	1.03127
	1658.72	0.0836947	0.200382	0.179047	0.181271	0.0848538	0.0558474			1637.8	0.249149	0.605382	0.468565	0.397324	0.306176	0.198865			0.862338	3.94834	3.18052	2.31089	2.21794	0.806374
	1657.12	0.106373	0.211426	0.189119	0.175306	0.0947999	0.0586834			1636.19	0.252458	0.725132	0.520107	0.447103	0.344731	0.238208			0.915714	5.19878	4.50848	2.65948	2.18901
	1655.51	0.130257	0.209167	0.177039	0.185566	0.109593	0.0996572			1634.57	0.276458	0.759037	0.623186	0.476863	0.407316	0.269488			0.826503	3.64382	2.36883	2.69799	1.96476
	1653.9	0.10569	0.263592	0.221424	0.202649	0.109773	0.0665109			1632.96	0.306402	0.830619	0.677423	0.565129	0.465027	0.293452			0.886283	4.16911	2.88052	2.17754	2.15523
	1652.29	0.133545	0.259087	0.225502	0.207912	0.108061	0.093503			1631.35	0.373911	1.00935	0.779671	0.604355	0.519685	0.330602			0.668912	2.53027	1.95752	1.73887	2.11229
	1650.68	0.148392	0.289661	0.224927	0.185919	0.118749	0.113634			1629.73	0.384825	1.11	0.928957	0.697913	0.602358	0.386178				2.48338	2.54078	1.82962	2.42229
	1649.07	0.142986	0.289024	0.235873	0.258422	0.115045	0.0809033			1628.12	0.454352	1.26111	1.04026	0.789847	0.666139	0.434734				2.06465	2.33392	1.39554	1.93185
	1647.46	0.173343	0.368795	0.256299	0.249089	0.160904	0.102187			1626.51	0.496988	1.46378	1.15308	0.869217	0.766687	0.507318				2.21208	2.02438	1.50201	2.27627
	1645.85	0.143342	0.380029	0.284781	0.243538	0.165476	0.117743			1624.89	0.552869	1.58669	1.2905	1.00302	0.860241	0.585385				2.14727	2.01947	1.55693	2.37737
	1644.24	0.184707	0.398421	0.314592	0.313336	0.175805	0.114583			1623.28	0.609728	1.73628	1.48355	1.17912	0.964935	0.620796				2.17178	1.68138	1.60976	1.45312
	1642.63	0.187221	0.479005	0.326305	0.318699	0.216433	0.152561			1621.66	0.698604	1.96927	1.64526	1.30738	1.07907	0.727547				2.56909	1.42224	1.49019	0.840237
	1641.02	0.182544	0.477545	0.353682	0.307465	0.235416	0.168957			1620.05	0.775389	2.23857	1.83679	1.44396	1.1969	0.804429				1.96952	1.72727	1.33801	0.865785
	1639.41	0.219678	0.573869	0.431552	0.377472	0.272973	0.187993			1618.43	0.858973	2.48194	2.00285	1.6048	1.3527	0.901235				2.16173	1.93736	1.53184	0.888265
	1637.8	0.249149	0.605382	0.468565	0.397324	0.306176	0.198865			1616.81	0.947315	2.60892	2.16276	1.70085	1.38632	0.97973				1.74908	1.46672	1.27038	0.846009
	1636.19	0.252458	0.725132	0.520107	0.447103	0.344731	0.238208			1615.2	0.980684	2.6788	2.23361	1.80246	1.43845	1.03664				1.91502	1.48687	1.40274	0.620676
	1634.57	0.276458	0.759037	0.623186	0.476863	0.407316	0.269488			1613.58	0.97843	2.65403	2.24978	1.82198	1.42409	1.03937				2.01477	1.56949	1.15138	0.710876
	1632.96	0.306402	0.830619	0.677423	0.565129	0.465027	0.293452			1611.96	0.954343	2.51563	2.13204	1.76333	1.32756	1.01624				1.98314	1.56225	1.27673	0.785813
	1631.35	0.373911	1.00935	0.779671	0.604355	0.519685	0.330602			1610.35	0.878873	2.27353	1.96643	1.64419	1.20861	0.938317				2.04367	1.63222	1.18827	0.703961
	1629.73	0.384825	1.11	0.928957	0.697913	0.602358	0.386178			1608.73	0.768811	2.00121	1.7608	1.48587	1.05487	0.836599				1.51126	1.70092	1.36683	0.724225
	1628.12	0.454352	1.26111	1.04026	0.789847	0.666139	0.434734			1607.11	0.657676	1.67507	1.49525	1.27078	0.876719	0.730543					1.4102		0.719271
	1626.51	0.496988	1.46378	1.15308	0.869217	0.766687	0.507318			1605.49	0.564396	1.35011	1.22559	1.09325	0.69766	0.597399					1.41317		0.784782
	1624.89	0.552869	1.58669	1.2905	1.00302	0.860241	0.585385			1603.88	0.476768	1.07933	0.979603	0.913311	0.580823	0.503919					1.69297		0.843107
	1623.28	0.609728	1.73628	1.48355	1.17912	0.964935	0.620796			1602.26	0.395108	0.877566	0.757826	0.688246	0.445651	0.410025							0.741563
	1621.66	0.698604	1.96927	1.64526	1.30738	1.07907	0.727547			1600.64	0.338596	0.695133	0.617007	0.574306	0.36348	0.34259							0.823023
	1620.05	0.775389	2.23857	1.83679	1.44396	1.1969	0.804429			1599.02	0.279123	0.56693	0.512519	0.448059	0.301842	0.273813
	1618.43	0.858973	2.48194	2.00285	1.6048	1.3527	0.901235			1597.4	0.205251	0.402417	0.362728	0.362664	0.203721	0.213875
	1616.81	0.947315	2.60892	2.16276	1.70085	1.38632	0.97973			1595.78	0.16436	0.317744	0.309799	0.259785	0.161736	0.174441
	1615.2	0.980684	2.6788	2.23361	1.80246	1.43845	1.03664			1594.15	0.152459	0.289269	0.227646	0.236646	0.120094	0.155719
	1613.58	0.97843	2.65403	2.24978	1.82198	1.42409	1.03937			1592.53	0.144524	0.173368	0.17111	0.145597	0.0888928	0.119877
	1611.96	0.954343	2.51563	2.13204	1.76333	1.32756	1.01624			1590.91	0.103331	0.159234	0.13992	0.157418	0.0704239	0.0893384
	1610.35	0.878873	2.27353	1.96643	1.64419	1.20861	0.938317			1589.29	0.0637532	0.0811599	0.0981076	0.112375	0.0608501	0.0959345
	1608.73	0.768811	2.00121	1.7608	1.48587	1.05487	0.836599			1587.67	0.0748297	0.0843818	0.0790777	0.0647158	0.05517	0.0825718
	1607.11	0.657676	1.67507	1.49525	1.27078	0.876719	0.730543			1586.04	0.0447251	0.0329971	0.0221102	0.0578001	0.025873	0.0790525
	1605.49	0.564396	1.35011	1.22559	1.09325	0.69766	0.597399			1584.42	0.0245498	0.0605499	0.0412753	0.0595075	0.0289983	0.0418552
	1603.88	0.476768	1.07933	0.979603	0.913311	0.580823	0.503919			1582.8	0.0418142	-0.00442967	0.070021	0.0285403	0.0191035	0.0631245
	1602.26	0.395108	0.877566	0.757826	0.688246	0.445651	0.410025			1581.18	0.0395597	0.0634454	0.014	0.0407245	0.0275222	0.0398338
	1600.64	0.338596	0.695133	0.617007	0.574306	0.36348	0.34259			1579.55	0.0168027	0.0581019	0.0620977	0.0335002	0.0164775	0.029927
	1599.02	0.279123	0.56693	0.512519	0.448059	0.301842	0.273813			1577.93	0.0572159	0.0631255	0.0744356	0.0855416	0.0433228	0.0497405
	1597.4	0.205251	0.402417	0.362728	0.362664	0.203721	0.213875			1576.3	0.031318	0.0953077	0.101175	0.0476245	0.039052	0.0450267
	1595.78	0.16436	0.317744	0.309799	0.259785	0.161736	0.174441			1574.68	0.0694629	0.121526	0.101545	0.0964614	0.0675099	0.0361605
	1594.15	0.152459	0.289269	0.227646	0.236646	0.120094	0.155719			1573.05	0.0603528	0.15574	0.143061	0.131813	0.0728094	0.0583705
	1592.53	0.144524	0.173368	0.17111	0.145597	0.0888928	0.119877			1571.43	0.0590191	0.160433	0.172615	0.118902	0.102446	0.0510979
	1590.91	0.103331	0.159234	0.13992	0.157418	0.0704239	0.0893384			1569.8	0.0685402	0.171707	0.172214	0.129667	0.0894496	0.0524925
	1589.29	0.0637532	0.0811599	0.0981076	0.112375	0.0608501	0.0959345
	1587.67	0.0748297	0.0843818	0.0790777	0.0647158	0.05517	0.0825718
	1586.04	0.0447251	0.0329971	0.0221102	0.0578001	0.025873	0.0790525
	1584.42	0.0245498	0.0605499	0.0412753	0.0595075	0.0289983	0.0418552
	1582.8	0.0418142	-0.00442967	0.070021	0.0285403	0.0191035	0.0631245
	1581.18	0.0395597	0.0634454	0.014	0.0407245	0.0275222	0.0398338
	1579.55	0.0168027	0.0581019	0.0620977	0.0335002	0.0164775	0.029927
	1577.93	0.0572159	0.0631255	0.0744356	0.0855416	0.0433228	0.0497405
	1576.3	0.031318	0.0953077	0.101175	0.0476245	0.039052	0.0450267
	1574.68	0.0694629	0.121526	0.101545	0.0964614	0.0675099	0.0361605
	1573.05	0.0603528	0.15574	0.143061	0.131813	0.0728094	0.0583705
	1571.43	0.0590191	0.160433	0.172615	0.118902	0.102446	0.0510979
	1569.8	0.0685402	0.171707	0.172214	0.129667	0.0894496	0.0524925
	1568.18	0.0765253	0.258644	0.203263	0.18781	0.111725	0.0609432
	1566.55	0.0888854	0.29771	0.195916	0.19197	0.13514	0.0732614
	1564.92	0.0834445	0.327965	0.322181	0.236519	0.16346	0.0996398
	1563.29	0.103963	0.394414	0.319971	0.261404	0.189789	0.112893
	1561.67	0.11679	0.380181	0.337584	0.281526	0.203443	0.140851
	1560.04	0.143935	0.502423	0.391268	0.314468	0.234568	0.138672
	1558.41	0.160692	0.555548	0.451709	0.355562	0.266629	0.14839
	1556.78	0.139849	0.590128	0.517651	0.41197	0.285277	0.166521
	1555.15	0.186917	0.646226	0.540572	0.438392	0.314346	0.197487
	1553.52	0.204506	0.690091	0.584939	0.478031	0.330837	0.198205
	1551.89	0.210273	0.757955	0.616722	0.509354	0.351455	0.193068
	1550.26	0.218985	0.776929	0.67319	0.532567	0.350059	0.238681
	1548.63	0.227147	0.787185	0.685222	0.534925	0.399599	0.264708
	1547	0.243898	0.839925	0.678369	0.556036	0.391398	0.248292
	1545.37	0.247827	0.823376	0.710021	0.578758	0.407514	0.250056
	1543.74	0.240907	0.808797	0.70301	0.604772	0.41268	0.258288
	1542.11	0.260234	0.833613	0.710643	0.563212	0.408423	0.264668
	1540.48	0.258838	0.846537	0.72637	0.603429	0.392839	0.280152
	1538.85	0.262824	0.834365	0.713339	0.608165	0.399625	0.256902
	1537.21	0.250396	0.821731	0.729122	0.605289	0.398348	0.277835
	1535.58	0.228665	0.795518	0.741045	0.588796	0.392466	0.254261
	1533.95	0.265945	0.837855	0.720381	0.572383	0.409974	0.275265
	1532.31	0.25416	0.785571	0.715998	0.573409	0.42063	0.26153
	1530.68	0.248201	0.805425	0.738776	0.594949	0.416662	0.262792
	1529.04	0.288967	0.76671	0.729054	0.632375	0.418819	0.273788
	1527.41	0.259066	0.855146	0.75331	0.62502	0.432769	0.280285
	1525.77	0.242745	0.864138	0.774883	0.60699	0.435909	0.299317
	1524.14	0.247646	0.843933	0.786576	0.654078	0.433164	0.322136
	1522.5	0.266695	0.907808	0.830658	0.67784	0.461753	0.323459
	1520.87	0.280275	0.913676	0.909242	0.699728	0.484852	0.296097
	1519.23	0.262075	1.01093	0.910792	0.700351	0.514824	0.338546
	1517.59	0.280604	1.04053	0.946577	0.712751	0.538534	0.357419
	1515.96	0.303408	1.10384	1.04329	0.76993	0.569644	0.349124
	1514.32	0.294402	1.18116	1.03162	0.843409	0.603638	0.35887
	1512.68	0.3187	1.23997	1.09038	0.861802	0.606753	0.387772
	1511.04	0.322797	1.27508	1.14483	0.89471	0.637665	0.417578
	1509.4	0.329689	1.34797	1.2	0.918442	0.678003	0.428129
	1507.77	0.351637	1.40703	1.18193	0.930805	0.687028	0.451199
	1506.12	0.375754	1.47875	1.26665	0.942378	0.709479	0.484934
	1504.49	0.387864	1.4978	1.29754	1.00382	0.712271	0.485934
	1502.85	0.390466	1.46519	1.29835	0.987916	0.700488	0.476848
	1501.21	0.408408	1.47146	1.25976	0.999762	0.707208	0.4997
	1499.57	0.380142	1.44427	1.26658	0.94841	0.684532	0.502356
	1497.92	0.387327	1.3257	1.22035	0.968483	0.68094	0.495688
	1496.28	0.363957	1.32647	1.16978	0.921123	0.649459	0.47816
	1494.64	0.359194	1.2467	1.08501	0.883015	0.628781	0.465606
	1493	0.341757	1.12737	1.01161	0.878253	0.587663	0.429551
	1491.36	0.334386	1.05653	1.00313	0.833148	0.575068	0.430332
	1489.71	0.30797	1.0045	0.943262	0.745027	0.527069	0.400069
	1488.07	0.312815	0.952809	0.837158	0.697629	0.538229	0.372601
	1486.43	0.266586	0.850624	0.804974	0.638455	0.457491	0.315964
	1484.79	0.261504	0.760649	0.732219	0.610045	0.410027	0.301403
	1483.14	0.250167	0.671102	0.63978	0.565577	0.35044	0.292507
	1481.5	0.198907	0.561402	0.569763	0.461978	0.330486	0.241484
	1479.85	0.17506	0.463757	0.515644	0.385768	0.257282	0.216777
	1478.21	0.161831	0.417362	0.41421	0.360689	0.206631	0.205907
	1476.56	0.130238	0.369111	0.402494	0.300037	0.199237	0.180347
	1474.92	0.10686	0.317588	0.344598	0.260197	0.170916	0.170935
	1473.27	0.112227	0.302407	0.30928	0.24492	0.16133	0.15042
	1471.62	0.0983199	0.261633	0.323947	0.247894	0.140899	0.139799
	1469.98	0.0927593	0.28509	0.308965	0.238842	0.165176	0.13225
	1468.33	0.102986	0.27399	0.327708	0.247677	0.164256	0.144713
	1466.68	0.101887	0.268946	0.364977	0.277102	0.21827	0.149977
	1465.03	0.143066	0.381221	0.374183	0.325782	0.225666	0.177916
	1463.38	0.144595	0.410783	0.464401	0.334362	0.267371	0.20114
	1461.74	0.15458	0.502355	0.509476	0.412256	0.30079	0.212985
	1460.09	0.182739	0.544776	0.564751	0.436112	0.350955	0.231993
	1458.44	0.227121	0.660124	0.62947	0.474221	0.391975	0.280616
	1456.79	0.256491	0.723464	0.69481	0.540943	0.416945	0.287012
	1455.14	0.248275	0.743642	0.736734	0.599374	0.421465	0.311808
	1453.49	0.228579	0.77935	0.761947	0.563253	0.417815	0.296606
	1451.84	0.260384	0.781426	0.742278	0.587959	0.432954	0.311776
	1450.19	0.23832	0.77415	0.7684	0.571608	0.399519	0.285566
	1448.54	0.206743	0.76147	0.730472	0.541783	0.371985	0.275604
	1446.88	0.200351	0.724029	0.700974	0.496335	0.356605	0.28281
	1445.23	0.206002	0.68714	0.650293	0.474272	0.303555	0.272339
	1443.58	0.188933	0.582241	0.608218	0.454742	0.286026	0.22973
	1441.93	0.161438	0.603915	0.563643	0.437625	0.251446	0.224093
	1440.27	0.159636	0.597262	0.521262	0.418148	0.244992	0.188372
	1438.62	0.126433	0.492547	0.505687	0.354382	0.221037	0.171269
	1436.97	0.127703	0.481576	0.411748	0.365168	0.220193	0.153097
	1435.31	0.129354	0.461865	0.374157	0.32024	0.177457	0.149426
	1433.66	0.114822	0.415782	0.375906	0.297178	0.160113	0.143749
	1432	0.101317	0.328392	0.322621	0.276398	0.168688	0.137372
	1430.35	0.0905841	0.367664	0.364141	0.291766	0.14907	0.112276
	1428.69	0.0794158	0.31997	0.341672	0.290521	0.155094	0.107248
	1427.04	0.0876191	0.360088	0.465208	0.261786	0.138191	0.0885475
	1425.38	0.0690853	0.31367	0.325401	0.26905	0.142404	0.0798752
	1423.72	0.0938319	0.287201	0.294721	0.246439	0.136744	0.0936575
	1422.07	0.0713589	0.333649	0.307807	0.253722	0.140491	0.0597425
	1420.41	0.0737547	0.315759	0.342234	0.250155	0.147072	0.088202
	1418.75	0.086802	0.311732	0.310812	0.272451	0.160402	0.0714215
	1417.09	0.0787254	0.32491	0.306838	0.254939	0.135537	0.0883198
	1415.44	0.0888743	0.306955	0.274741	0.224771	0.143813	0.0752289
	1413.78	0.0870794	0.279656	0.2798	0.2596	0.116065	0.0613135
	1412.12	0.0737152	0.271376	0.263899	0.232774	0.123882	0.0833233
	1410.46	0.0731804	0.234829	0.253367	0.227304	0.120032	0.0604763
	1408.8	0.0603893	0.300479	0.266845	0.202642	0.0844848	0.0444045
	1407.14	0.0697542	0.233105	0.261638	0.247566	0.104338	0.0511994
	1405.48	0.0694896	0.274082	0.184899	0.210773	0.102469	0.045482
	1403.82	0.0482618	0.252473	0.212514	0.220269	0.0788143	0.0282266
	1402.16	0.0619429	0.262478	0.235814	0.221515	0.110416	0.0558476
	1400.5	0.0602507	0.284481	0.218198	0.208982	0.108221	0.0606035
	1398.83	0.0564216	0.238893	0.237834	0.20385	0.079462	0.03876
	1397.17	0.0450427	0.212479	0.210967	0.16085	0.0900722	0.0560757
	1395.51	0.0758044	0.20427	0.18427	0.172864	0.0970735	0.0654289
	1393.85	0.0486261	0.158123	0.17749	0.161821	0.0662809	0.0366435
	1392.18	0.0402802	0.146262	0.169526	0.153126	0.0684762	0.061792
	1390.52	0.0739857	0.229013	0.15964	0.12695	0.0693908	0.0624532
	1388.86	0.0586348	0.13206	0.122854	0.126104	0.0548441	0.0540438
	1387.19	0.0452619	0.141482	0.155724	0.124732	0.0728506	0.0377757
	1385.53	0.0559683	0.140343	0.104572	0.107089	0.0682328	0.0590788
	1383.86	0.0430376	0.115398	0.0948207	0.0749338	0.060155	0.0407304
	1382.2	0.0542272	0.0755809	0.0895679	0.110086	0.0588409	0.0398839
	1380.53	0.0549429	0.0943664	0.0966337	0.0870764	0.040651	0.0449892
	1378.87	0.0478193	0.124025	0.0551073	0.103916	0.0544849	0.0303617
	1377.2	0.054015	0.0780375	0.106836	0.0969368	0.073225	0.0309164
	1375.53	0.0453249	0.0726227	0.0736164	0.067342	0.0464916	0.0488837
	1373.87	0.0499872	0.106566	0.0682656	0.0626606	0.0334875	0.0582419
	1372.2	0.0419464	0.1028	0.0678046	0.0899194	0.0444581	0.0336281
	1370.53	0.0541513	0.0978255	0.0545309	0.069503	0.0609481	0.0621646
	1368.86	0.0636529	0.0749597	0.0444414	0.0631205	0.0280252	0.0467541
	1367.19	0.0524607	0.135746	0.0642201	0.0740541	0.0469643	0.045431
	1365.53	0.0436023	0.061701	0.0628377	0.0621527	0.0565787	0.058226
	1363.86	0.058469	0.0889791	0.0409969	0.0680528	0.0526808	0.049232
	1362.19	0.058144	0.110117	0.0652636	0.0763911	0.0744042	0.078601
	1360.52	0.0399493	0.122778	0.0801949	0.0922724	0.0711789	0.049438
	1358.85	0.0547547	0.116136	0.0794747	0.0831385	0.0524864	0.0500851
	1357.18	0.0617448	0.104293	0.0877928	0.108506	0.0746246	0.0645549
	1355.5	0.0652822	0.171713	0.0715085	0.08387	0.0928621	0.0732041
	1353.83	0.0789564	0.170912	0.137699	0.119911	0.11692	0.0788741
	1352.16	0.0928768	0.159234	0.148048	0.157947	0.139801	0.0968314
	1350.49	0.119035	0.22306	0.165595	0.182704	0.145579	0.112138
	1348.82	0.129184	0.355974	0.257347	0.236346	0.211943	0.152712
	1347.14	0.160165	0.383568	0.317883	0.281887	0.224108	0.15939
	1345.47	0.18568	0.477218	0.370696	0.320973	0.294139	0.212682
	1343.8	0.210797	0.591682	0.510278	0.39964	0.332017	0.225542
	1342.12	0.236918	0.791304	0.600863	0.476435	0.414037	0.293525
	1340.45	0.299439	0.870795	0.727958	0.566627	0.482717	0.325176
	1338.78	0.354403	1.01838	0.839473	0.631568	0.543823	0.365742
	1337.1	0.357119	1.1359	0.947896	0.728541	0.594993	0.404482
	1335.43	0.419454	1.28496	1.04398	0.785334	0.647246	0.429734
	1333.75	0.418939	1.36543	1.10057	0.842553	0.671799	0.478065
	1332.07	0.448112	1.46144	1.18285	0.903708	0.702814	0.497213
	1330.4	0.424169	1.49905	1.17091	0.898379	0.707301	0.502361
	1328.72	0.463457	1.49645	1.15784	0.938316	0.694027	0.521983
	1327.04	0.431846	1.47633	1.20185	0.916068	0.680737	0.512643
	1325.37	0.465874	1.47252	1.16731	0.930895	0.660881	0.537815
	1323.69	0.481017	1.49913	1.17958	0.906764	0.657612	0.522592
	1322.01	0.477478	1.42635	1.16944	0.873071	0.62386	0.532291
	1320.33	0.469445	1.2993	1.0453	0.865825	0.626131	0.516211
	1318.65	0.45357	1.34835	1.03048	0.834471	0.589806	0.482547
	1316.97	0.442723	1.28244	1.00601	0.801431	0.575648	0.493833
	1315.29	0.419894	1.24079	0.971817	0.750254	0.550069	0.473403
	1313.62	0.420013	1.15231	0.914362	0.736195	0.53179	0.43623
	1311.94	0.406211	1.12262	0.929362	0.670841	0.495413	0.419421
	1310.26	0.388532	1.08344	0.90287	0.676873	0.473605	0.40413
	1308.57	0.367391	1.06613	0.861844	0.644674	0.416337	0.398147
	1306.89	0.35962	1.01223	0.788881	0.615649	0.462075	0.357336
	1305.21	0.339967	0.997798	0.762339	0.588724	0.435452	0.346843
	1303.53	0.33645	0.954651	0.712762	0.606278	0.428884	0.339566
	1301.85	0.325982	0.962705	0.677207	0.548228	0.419211	0.331381
	1300.16	0.33853	0.912544	0.675279	0.556127	0.40987	0.351782
	1298.48	0.30723	0.906522	0.658625	0.553907	0.391019	0.3264
	1296.8	0.298299	0.846142	0.607848	0.503118	0.383195	0.329462
	1295.12	0.290578	0.799792	0.586306	0.506961	0.386621	0.293838
	1293.43	0.287041	0.757914	0.57813	0.47497	0.354516	0.275374
	1291.75	0.304248	0.753933	0.510153	0.431026	0.339371	0.273105
	1290.06	0.263556	0.677432	0.484319	0.401184	0.309686	0.255751
	1288.38	0.243515	0.628171	0.461661	0.389529	0.287516	0.207384
	1286.69	0.233897	0.572822	0.393486	0.371642	0.272604	0.191919
	1285	0.235948	0.577874	0.393642	0.349272	0.254554	0.203385
	1283.32	0.197064	0.494481	0.373032	0.347778	0.244014	0.182688
	1281.63	0.200262	0.520555	0.364126	0.321133	0.228777	0.183736
	1279.95	0.219141	0.54193	0.328552	0.29335	0.229141	0.18939
	1278.26	0.182722	0.464586	0.322674	0.293477	0.226308	0.187558
	1276.57	0.195458	0.514145	0.330262	0.314452	0.223568	0.184506
	1274.88	0.186673	0.484984	0.309082	0.271757	0.212361	0.186978
	1273.19	0.174098	0.495803	0.301156	0.253944	0.20613	0.161142
	1271.51	0.179901	0.457559	0.297513	0.268622	0.188183	0.162212
	1269.82	0.151635	0.371277	0.256412	0.20857	0.160074	0.152339
	1268.13	0.155717	0.362936	0.220359	0.2131	0.159703	0.129997
	1266.44	0.142305	0.268414	0.191211	0.16698	0.132819	0.14541
	1264.75	0.14689	0.238639	0.170612	0.143176	0.117036	0.129326
	1263.06	0.110709	0.165799	0.13323	0.111658	0.106565	0.116864
	1261.37	0.0906901	0.207283	0.104468	0.107736	0.0926276	0.116395
	1259.67	0.0987421	0.172689	0.0828036	0.0901964	0.0928558	0.10635
	1257.98	0.0985141	0.131458	0.0719659	0.0853582	0.0819335	0.0952724
	1256.29	0.108495	0.140382	0.109059	0.0568839	0.0755164	0.100327
	1254.6	0.094345	0.101151	0.083818	0.0574867	0.0891139	0.0911452
	1252.91	0.103698	0.139477	0.10876	0.0927685	0.0883681	0.0929435
	1251.21	0.108175	0.118258	0.111875	0.0835902	0.0962688	0.0956101
	1249.52	0.0990799	0.17344	0.141857	0.0848609	0.102119	0.0997918
	1247.83	0.124468	0.179702	0.143498	0.133163	0.122243	0.0972858
	1246.13	0.138518	0.160613	0.113724	0.121175	0.0940404	0.106621
	1244.44	0.121153	0.170074	0.143252	0.13633	0.125653	0.105355
	1242.74	0.109085	0.182279	0.131551	0.115082	0.107307	0.089143
	1241.05	0.12102	0.166992	0.139639	0.12902	0.104339	0.104425
	1239.35	0.0970956	0.179985	0.142842	0.115277	0.0923968	0.0964709
	1237.65	0.108637	0.104497	0.117228	0.107525	0.0786781	0.0986374
	1235.96	0.133406	0.182214	0.107512	0.112364	0.0984927	0.108661
	1234.26	0.117876	0.137026	0.107182	0.119423	0.0819936	0.087477
	1232.56	0.0909756	0.160518	0.0934296	0.0906596	0.071269	0.0927298
	1230.87	0.107767	0.138146	0.0741586	0.0862037	0.0748305	0.0841506
	1229.17	0.0960794	0.151056	0.0946074	0.0995232	0.0686666	0.0752373
	1227.47	0.0927478	0.12183	0.0547535	0.0862407	0.0423148	0.0583086
	1225.77	0.0924234	0.0866161	0.09652	0.0746426	0.0709612	0.0703897
	1224.07	0.0822878	0.113837	0.0830409	0.0741525	0.0405287	0.046247
	1222.38	0.092461	0.129261	0.102461	0.126794	0.0598231	0.0578192
	1220.68	0.0944213	0.119504	0.0720738	0.0933322	0.0553418	0.0617964
	1218.98	0.0727506	0.132015	0.0876881	0.0749861	0.0759083	0.0430983
	1217.28	0.0819755	0.117902	0.0926884	0.0984775	0.0742253	0.0546174
	1215.58	0.0896904	0.174549	0.0947922	0.0741338	0.0557391	0.0421129
	1213.88	0.0865383	0.138735	0.121556	0.0921392	0.0564461	0.0506944
	1212.17	0.0952167	0.102367	0.121319	0.0916461	0.0577859	0.0394541
	1210.47	0.087058	0.156304	0.103527	0.107636	0.0534365	0.0514578
	1208.77	0.0973467	0.12853	0.122349	0.0935769	0.0842968	0.0386172
	1207.07	0.101111	0.177556	0.152596	0.0793983	0.0739421	0.0664008
	1205.37	0.0984901	0.148999	0.137677	0.120005	0.0704832	0.053577
	1203.66	0.0853193	0.203812	0.119244	0.12503	0.0708432	0.0657276
	1201.96	0.105417	0.236729	0.17712	0.124012	0.0830447	0.0645284
	1200.25	0.0916466	0.222628	0.161465	0.132403	0.0728253	0.0618901
	1198.55	0.0985404	0.228346	0.198241	0.13958	0.0920219	0.0452986
	1196.85	0.109643	0.233563	0.218855	0.128959	0.0989958	0.0614057
	1195.14	0.10791	0.246364	0.225042	0.13546	0.0958372	0.0703518
	1193.44	0.106212	0.322415	0.222081	0.136325	0.103307	0.093605
	1191.73	0.115101	0.327188	0.237356	0.173557	0.13047	0.0925946
	1190.02	0.113486	0.340882	0.260006	0.175742	0.116751	0.100957
	1188.32	0.142341	0.361308	0.279616	0.190715	0.134145	0.102848
	1186.61	0.134454	0.374275	0.336649	0.214116	0.132535	0.114756
	1184.9	0.143246	0.429691	0.312278	0.233668	0.149149	0.120224
	1183.2	0.159981	0.502217	0.356141	0.227294	0.169328	0.144655
	1181.49	0.158069	0.560417	0.37768	0.237036	0.177947	0.157744
	1179.78	0.177191	0.555704	0.435796	0.265864	0.18014	0.158472
	1178.07	0.157407	0.646405	0.460921	0.33723	0.214088	0.173498
	1176.36	0.18912	0.663384	0.514547	0.325728	0.23166	0.178637
	1174.65	0.21652	0.757711	0.531593	0.348839	0.256611	0.20971
	1172.94	0.216125	0.74536	0.580414	0.381717	0.271748	0.207136
	1171.23	0.235356	0.782199	0.611403	0.394539	0.280648	0.218393
	1169.52	0.242502	0.782764	0.587775	0.418137	0.294377	0.241087
	1167.81	0.235899	0.748494	0.595477	0.395404	0.272299	0.231611
	1166.1	0.238435	0.715567	0.584538	0.384625	0.248814	0.222231
	1164.39	0.210696	0.656173	0.508939	0.348259	0.243241	0.219836
	1162.68	0.187651	0.583434	0.470951	0.310856	0.197489	0.182449
	1160.96	0.152552	0.502805	0.381546	0.271093	0.171879	0.16435
	1159.25	0.147215	0.403983	0.303633	0.207133	0.14073	0.147605
	1157.54	0.135433	0.315699	0.277516	0.178607	0.10488	0.117315
	1155.83	0.116554	0.23434	0.243071	0.155	0.0791708	0.0964179
	1154.11	0.103466	0.179617	0.203992	0.128432	0.0575884	0.0842953
	1152.4	0.0959837	0.194457	0.15732	0.0750541	0.0726572	0.0777304
	1150.68	0.0957164	0.115205	0.150987	0.0614453	0.0323732	0.0647278
	1148.97	0.0703315	0.117838	0.132717	0.0506182	0.0440564	0.0593916
	1147.25	0.0590384	0.076789	0.0938287	0.0365344	0.0304266	0.0437328
	1145.54	0.0587171	0.066085	0.074097	0.0635057	0.0281897	0.0571307
	1143.82	0.0590229	0.0502698	0.0850525	0.0299957	0.0250838	0.0430494
	1142.11	0.0719289	0.0462865	0.101662	0.0365998	0.0285603	0.0393673
	1140.39	0.0525623	0.0483359	0.0766623	0.0414608	0.0274824	0.0446967
	1138.67	0.0615868	0.0114244	0.0687773	0.0443502	0.0486866	0.0541734
	1136.96	0.0504911	0.0348368	0.0655599	0.0428222	0.0302403	0.0299194
	1135.24	0.0623815	0.0456767	0.0705563	0.0618375	0.0194214	0.030349
	1133.52	0.0524037	0.0398847	0.0700985	0.0242747	0.0280917	0.0292511
	1131.8	0.043027	0.0277949	0.0420484	0.0442498	0.0102565	0.0211183
	1130.08	0.0391328	0.0709958	0.0584681	0.0309265	0.0406529	0.0235824
	1128.36	0.00896579	0.0181241	0.0801515	0.0120741	0.0237415	0.0115675
	1126.64	0.0277923	0.0359732	0.0466911	0.0354253	0.0013856	0.0272117
	1124.92	0.0456833	0.0611093	0.0996504	0.0573171	0.0116736	0.0218895
	1123.2	0.0382348	0.0330805	0.0785599	0.0283108	0.0217152	0.00867262
	1121.48	0.0290185	0.0740918	0.0632195	0.0242275	0.0151976	0.0362343
	1119.76	0.0285825	0.036026	0.11461	0.0491163	0.0118731	0.0282377
	1118.04	0.0278407	0.0544941	0.0926538	0.0492665	0.0241647	0.0122673
	1116.32	0.0424572	0.0943135	0.0931933	0.039066	0.0278665	0.0259485
	1114.6	0.0318019	0.098266	0.10166	0.0397078	0.033768	0.021364
	1112.87	0.0238653	0.0615641	0.138785	0.0659592	0.0291579	0.0182833
	1111.15	0.0203932	0.112814	0.0977165	0.0431658	0.0226493	0.0126704
	1109.43	0.0319475	0.0892111	0.114096	0.0647768	0.0347137	0.0152507
	1107.7	0.0255812	0.109146	0.121581	0.0764845	0.0298565	0.0129627
	1105.98	0.0388348	0.102862	0.116	0.078584	0.037068	0.0321874
	1104.26	0.0348568	0.0983564	0.133299	0.0619101	0.0324888	0.0135208
	1102.53	0.0385938	0.128969	0.134525	0.0704808	0.0456837	0.033747
	1100.8	0.0519646	0.138864	0.137798	0.0652214	0.055327	0.0394484
	1099.08	0.0473873	0.122992	0.130988	0.0770464	0.0546996	0.0302667
	1097.35	0.0501644	0.132263	0.158164	0.0870352	0.0510093	0.0432661
	1095.63	0.0482835	0.141845	0.17695	0.085065	0.063964	0.0446576
	1093.9	0.0446918	0.158619	0.134659	0.0956763	0.0645138	0.0355538
	1092.17	0.0493502	0.168095	0.153464	0.106794	0.073545	0.0361105
	1090.45	0.0568465	0.138554	0.156401	0.102819	0.0723677	0.0453701
	1088.72	0.0599931	0.150127	0.190298	0.13015	0.071726	0.0417724
	1086.99	0.0706003	0.138621	0.148754	0.120946	0.0783668	0.0448401
	1085.26	0.0560881	0.136629	0.166298	0.109646	0.0793745	0.056393
	1083.53	0.0613549	0.129122	0.149563	0.10076	0.0748679	0.0431764
	1081.8	0.057594	0.123592	0.172502	0.121217	0.0789403	0.0524755
	1080.07	0.0601363	0.130803	0.163118	0.107058	0.0698848	0.0592688
	1078.35	0.046072	0.134802	0.136338	0.0996724	0.0661297	0.0675264
	1076.62	0.0502193	0.103744	0.141113	0.104044	0.0567367	0.0470154
	1074.88	0.0503815	0.113984	0.124603	0.110084	0.054469	0.0482544
	1073.15	0.0573321	0.0830605	0.108462	0.096388	0.0650885	0.0331821
	1071.42	0.0436292	0.0925317	0.13034	0.092247	0.0706509	0.0415832
	1069.69	0.0583154	0.0892991	0.102449	0.0888941	0.0575963	0.0532006
	1067.96	0.052781	0.0974795	0.13466	0.0778841	0.0618566	0.0463902
	1066.22	0.0541871	0.0788342	0.103081	0.0910039	0.0639614	0.0371978
	1064.49	0.0487895	0.0907583	0.11659	0.0854594	0.0593544	0.0427261
	1062.76	0.0475906	0.0932421	0.118197	0.0599661	0.061113	0.0483137
	1061.03	0.0451756	0.0894898	0.146328	0.0740975	0.0620292	0.0401056
	1059.29	0.0539237	0.0725902	0.108573	0.0673919	0.0600628	0.0483978
	1057.56	0.0327954	0.0764823	0.124702	0.0596269	0.051694	0.0434437
	1055.82	0.031114	0.0882826	0.0999255	0.080257	0.0562978	0.0457553
	1054.09	0.0449793	0.102311	0.130806	0.0955039	0.0573572	0.0550797
	1052.35	0.0432067	0.0777644	0.125882	0.0810125	0.0642864	0.0387802
	1050.62	0.0416509	0.110736	0.131349	0.0756619	0.0529679	0.0411333
	1048.88	0.0579341	0.105008	0.122477	0.0835276	0.0674221	0.0458885
	1047.14	0.0581701	0.0770365	0.131722	0.0831872	0.0694893	0.0478645
	1045.41	0.0374517	0.0813256	0.151787	0.0869805	0.0546548	0.0516672
	1043.67	0.023216	0.0928706	0.129232	0.0838371	0.0631503	0.0315425
	1041.93	0.0250661	0.0669954	0.149609	0.0840011	0.0671028	0.030025
	1040.19	0.0491267	0.069312	0.146071	0.0780611	0.0557008	0.0389094
	1038.46	0.0415376	0.0873886	0.146617	0.0972916	0.0760697	0.0346715
	1036.72	0.0404383	0.0978583	0.151507	0.0997614	0.0737306	0.0385172
	1034.98	0.0449826	0.114139	0.156227	0.102738	0.0905343	0.0327492
	1033.24	0.0457973	0.139421	0.158518	0.120703	0.0772409	0.0364257
	1031.5	0.061557	0.1526	0.165245	0.148457	0.113024	0.0513332
	1029.76	0.0509548	0.151	0.190801	0.134311	0.0952799	0.0659088
	1028.02	0.0592505	0.184677	0.219799	0.148496	0.106703	0.0829948
	1026.28	0.070545	0.195331	0.22865	0.169867	0.117154	0.0894225
	1024.53	0.0705436	0.20998	0.243876	0.184786	0.135011	0.0874246
	1022.79	0.0761275	0.220272	0.282226	0.200087	0.140876	0.0945751
	1021.05	0.0996631	0.219508	0.273795	0.221224	0.150121	0.10294
	1019.31	0.0904411	0.289884	0.314891	0.216449	0.174502	0.11781
	1017.56	0.0954769	0.299338	0.345498	0.233039	0.175097	0.101174
	1015.82	0.0954153	0.32803	0.346399	0.25496	0.187963	0.125569
	1014.08	0.132478	0.353194	0.347432	0.275595	0.215248	0.126698
	1012.33	0.128766	0.389809	0.397033	0.285612	0.220851	0.13702
	1010.59	0.137595	0.436993	0.423327	0.327782	0.237101	0.152582
	1008.84	0.141913	0.423723	0.449108	0.332884	0.248558	0.132712
	1007.1	0.16005	0.422248	0.458278	0.346357	0.251343	0.154562
	1005.35	0.163524	0.461364	0.500084	0.355369	0.271561	0.148206
	1003.61	0.154354	0.485486	0.475791	0.369189	0.268046	0.150846
	1001.86	0.159079	0.489376	0.484461	0.379509	0.273334	0.162611
	1000.11	0.168276	0.513917	0.515761	0.361949	0.257223	0.151231
	998.367	0.155944	0.52493	0.486228	0.377616	0.256095	0.156038
	996.619	0.160456	0.501188	0.484526	0.364511	0.266908	0.157856
	994.871	0.157148	0.461252	0.493182	0.35921	0.243285	0.14579
	993.123	0.157989	0.459423	0.477959	0.346886	0.24756	0.150861
	991.375	0.156767	0.479071	0.482604	0.351859	0.253733	0.156591
	989.627	0.144171	0.454306	0.456427	0.321402	0.242092	0.168134
	987.877	0.139535	0.44236	0.446257	0.331575	0.247438	0.159856
	986.127	0.139537	0.445643	0.471386	0.322894	0.231501	0.137891
	984.377	0.131006	0.438209	0.460199	0.320482	0.242465	0.147201
	982.627	0.134172	0.429293	0.458194	0.32032	0.237397	0.140997
	980.875	0.136293	0.438767	0.414532	0.33189	0.220417	0.123385
	979.125	0.122325	0.405928	0.42571	0.312295	0.226563	0.136367
	977.373	0.132269	0.395961	0.420787	0.328166	0.211861	0.133041
	975.621	0.117458	0.429313	0.405998	0.30492	0.222856	0.131441
	973.869	0.127911	0.407423	0.417614	0.312381	0.223757	0.133537
	972.115	0.116064	0.386677	0.418354	0.282329	0.236083	0.142553
	970.363	0.129225	0.410596	0.429702	0.314691	0.226226	0.151515
	968.609	0.118249	0.402225	0.405621	0.300831	0.228841	0.154483
	966.855	0.110669	0.387648	0.407979	0.288789	0.232383	0.136858
	965.102	0.137631	0.399647	0.416144	0.304689	0.223659	0.141914
	963.346	0.126779	0.402397	0.407073	0.299791	0.229129	0.138895
	961.592	0.122929	0.418003	0.444168	0.321429	0.225545	0.130461
	959.836	0.122053	0.43302	0.440632	0.322976	0.245048	0.133028
	958.08	0.128673	0.451647	0.433086	0.312684	0.249037	0.141158
	956.324	0.144936	0.456671	0.458285	0.331632	0.252716	0.149327
	954.568	0.136072	0.435293	0.455349	0.325876	0.239433	0.15097
	952.811	0.138133	0.409735	0.420692	0.333481	0.228671	0.14383
	951.053	0.138265	0.396694	0.43395	0.325779	0.233373	0.134677
	949.297	0.121166	0.378718	0.406006	0.323062	0.222691	0.137186
	947.537	0.102226	0.345994	0.390002	0.273614	0.214763	0.125132
	945.779	0.103354	0.338844	0.399615	0.278014	0.194169	0.119552
	944.021	0.108969	0.310261	0.361277	0.265323	0.189038	0.127049
	942.262	0.104798	0.32525	0.347361	0.24867	0.175173	0.104391
	940.502	0.0881016	0.293591	0.33429	0.267172	0.193916	0.122363
	938.742	0.0992674	0.276764	0.346026	0.240168	0.177894	0.0923592
	936.982	0.10601	0.304917	0.317654	0.243704	0.172209	0.100403
	935.221	0.0917167	0.278216	0.30591	0.233862	0.15884	0.0904954
	933.461	0.0925508	0.323623	0.332433	0.208536	0.177285	0.115846
	931.699	0.0925541	0.305073	0.303085	0.223369	0.18433	0.101133
	929.938	0.0908246	0.275959	0.310123	0.248985	0.169688	0.0907811
	928.174	0.092001	0.284374	0.332854	0.229348	0.167396	0.110145
	926.412	0.0982504	0.294702	0.358119	0.237989	0.174522	0.106165
	924.648	0.102508	0.307365	0.359614	0.231051	0.171185	0.104095
	922.885	0.0893362	0.285528	0.362131	0.26185	0.173104	0.105169
	921.121	0.104597	0.326973	0.320533	0.240554	0.191083	0.100728
	919.357	0.0972169	0.317346	0.358399	0.269496	0.191368	0.113993
	917.594	0.110241	0.292516	0.34867	0.265141	0.203969	0.102921
	915.828	0.0952989	0.29606	0.354044	0.270239	0.186379	0.110511
	914.062	0.105763	0.30352	0.348825	0.261912	0.185457	0.0946202
	912.297	0.10346	0.310781	0.342699	0.256087	0.190684	0.10056
	910.531	0.103519	0.306561	0.358035	0.251107	0.186451	0.0961686
	908.766	0.104257	0.304687	0.354206	0.252144	0.171526	0.112299
	906.998	0.0947714	0.279981	0.327524	0.226567	0.173655	0.0910368
	905.23	0.0906339	0.272897	0.319519	0.262669	0.165429	0.0907641
	903.463	0.0821974	0.278187	0.327334	0.248135	0.169797	0.103074
	901.695	0.0922347	0.295815	0.325025	0.227952	0.158246	0.084214
	899.928	0.0723208	0.28251	0.297495	0.235698	0.156907	0.0867994
	898.158	0.0742852	0.240343	0.300918	0.215822	0.146159	0.0800289
	896.391	0.0715637	0.231376	0.272626	0.207927	0.138423	0.0640649
	894.621	0.0845126	0.261098	0.315696	0.20647	0.127116	0.0850515
	892.85	0.0745051	0.241572	0.291541	0.205784	0.129332	0.069561
	891.08	0.0623644	0.207149	0.267121	0.176662	0.124552	0.057913
	889.311	0.0716598	0.228594	0.246155	0.184623	0.120902	0.0659632
	887.539	0.0574072	0.190679	0.237249	0.173161	0.104975	0.0575561
	885.768	0.0634355	0.18584	0.226749	0.168154	0.104669	0.0494415
	883.996	0.0613598	0.178611	0.186744	0.152984	0.10086	0.0538827
	882.223	0.0466081	0.146288	0.202942	0.152993	0.0908295	0.0500643
	880.451	0.0484344	0.116487	0.174425	0.116777	0.0765455	0.0533482
	878.678	0.042114	0.133994	0.171722	0.108891	0.083903	0.0446424
	876.904	0.0356653	0.104302	0.129175	0.108718	0.06099	0.0341708
	875.131	0.0411327	0.111734	0.144179	0.102867	0.0719986	0.0360752
	873.357	0.034336	0.100535	0.0978465	0.106478	0.0453595	0.0270045
	871.582	0.0252502	0.0694779	0.108279	0.0743827	0.0512816	0.0225153
	869.809	0.0226231	0.0396257	0.112036	0.0496805	0.0304229	0.0265825
	868.033	0.0294572	0.0326942	0.0652347	0.0430902	0.0234796	0.0237614
	866.258	0.0325984	0.0485847	0.0581553	0.035926	0.0160375	0.0197149
	864.48	0.00678633	0.0259238	0.0442512	0.0361756	0.0184186	0.00776079
	862.705	0.017173	0.0264335	0.0337154	0.0293471	0.00424187	0.00881794
	860.928	0.0127803	-0.00293647	0.0467817	0.000710009	0.00759968	0.00976532
	859.15	0.0201574	-0.00991445	0.0263122	0.0125545	0.00684932	0.00104264
	857.373	0.00789771	-0.037617	0.0123484	0.00416303	-0.00411018	-0.00936787
	855.596	0.0167062	-0.0232656	0.00548624	0.0142602	-0.00124064	0.00254156
	853.816	-0.00233491	-0.022563	0.00154811	-0.00387463	-0.0090068	-0.00777769
	852.039	0.00183406	-0.0442174	-0.0154718	-0.00388111	-0.01121	-0.0184892
	850.26	-0.00286678	-0.0437408	-0.00871248	-0.00457351	-0.0157889	-0.00376749
	848.48	0.00132188	-0.046745	-0.0350294	-0.0137384	-0.02313	-0.0112679
	846.701	-0.00459006	-0.0596474	-0.0204202	-0.0232132	-0.00579214	-0.0132333
	844.92	0.000606783	-0.039579	-0.00255347	-0.0119037	-0.0092488	-0.00102337
	843.139	-0.00910489	-0.0296285	-0.0301046	-0.0168379	-0.0192112	-0.0170915
	841.359	-0.00372511	-0.0560884	-0.0269358	-0.0222148	-0.0177783	-0.0121414
	839.576	-0.00722761	-0.065199	-0.0238474	-0.0231211	-0.0272627	-0.0100258
	837.795	-0.00821203	-0.0685042	-0.0163833	-0.0121993	-0.0121425	-0.00581102
	836.014	-0.0191318	-0.0491031	-0.0312129	-0.0276148	-0.0109959	-0.0111125
	834.23	-0.00548993	-0.046953	-0.0121808	-0.0195912	-0.0160953	-0.00803985
	832.447	-0.00396781	-0.0572445	-0.0190473	-0.0121499	-0.0141892	0.00448805
	830.664	0.0103735	-0.0403273	-0.0191046	-0.0255666	-0.0117616	-0.00454824
	828.881	-8.25284e-07	-0.032007	-0.00632909	-0.00599264	-0.0135782	0.00347521
	827.098	0.0183462	-0.0101465	-0.01284	-0.0180045	0.00154961	0.00880491
	825.312	0.0053634	-0.0298869	-0.00922938	-0.0275488	-0.00656676	-0.0118195
	823.527	0.0152012	-0.00152939	-0.00638255	0.00305197	-0.0187225	0.0122113
	821.742	0.0183381	-0.012676	0.00120384	-0.00268872	-0.00375511	0.00478769
	819.957	0.0127912	0.0170859	0.00837551	-0.000885064	-0.00309348	0.00958219
	818.17	0.015226	-0.00167516	-0.00447317	0.00873025	-0.00578584	-0.00118671
	816.385	0.0116402	0.0194701	0.0209866	-0.00957388	-0.0114206	0.00111533
	814.598	0.00865948	0.0215871	0.0123717	0.0212491	0.000749726	0.0126707
	812.811	0.0109427	0.0350661	0.0188263	0.0317144	0.00077501	0.0125784
	811.023	0.0148996	-0.00710772	0.0238273	0.0355684	0.0162876	0.0123692
	809.234	0.0275197	0.0196929	0.0452153	0.0322689	0.0132611	0.0168092
	807.447	0.0299695	0.0462681	0.0435957	0.0266603	0.0258097	0.0228512
	805.658	0.0176706	0.0869594	0.0674988	0.0327313	0.0128269	0.0219375
	803.869	0.0226342	0.0883637	0.0594179	0.0351559	0.0126856	0.0195581
	802.078	0.0263316	0.0638174	0.0674113	0.0353984	0.0370349	0.0313887
	800.289	0.0362866	0.0617132	0.0770836	0.0487866	0.0237415	0.0331833
	798.498	0.0185282	0.0904887	0.0735391	0.0486979	0.0343833	0.0296089
	796.709	0.0267998	0.083999	0.0597107	0.0471173	0.0399237	0.038319
	794.918	0.0365158	0.0969675	0.0834069	0.0460912	0.0391244	0.034252
	793.125	0.0409561	0.0999789	0.0897738	0.0692922	0.0510647	0.044136
	791.334	0.036555	0.0924298	0.0705638	0.0688822	0.0361135	0.0478107
	789.541	0.0477672	0.13088	0.11386	0.0803124	0.0541796	0.0374016
	787.748	0.0506065	0.109176	0.116136	0.0797364	0.0656199	0.0493963
	785.955	0.0441059	0.151462	0.14434	0.0875278	0.0657352	0.0611443
	784.162	0.0628575	0.204365	0.164672	0.0993222	0.0751934	0.0606446
	782.369	0.0662957	0.215804	0.181919	0.10488	0.0861917	0.0598767
	780.574	0.0608645	0.216771	0.182722	0.112574	0.0942302	0.067497
	778.779	0.0718541	0.238853	0.188592	0.121719	0.0953757	0.071252
	776.984	0.0640758	0.220861	0.169374	0.108155	0.0947914	0.0837177
	775.189	0.068505	0.233051	0.188111	0.115415	0.090832	0.0801035
	773.395	0.0687258	0.231229	0.168659	0.128229	0.0929208	0.0790811
	771.598	0.0779818	0.219091	0.185809	0.129393	0.0844967	0.079019
	769.801	0.0761749	0.194982	0.177717	0.117027	0.094491	0.0833365
	768.004	0.0724649	0.215686	0.178385	0.115613	0.0835805	0.0714002
	766.207	0.0686831	0.22138	0.183383	0.116769	0.0836636	0.0838712
	764.41	0.0617268	0.199002	0.170222	0.106717	0.092036	0.0847093
	762.611	0.0835005	0.202338	0.153079	0.109245	0.0830781	0.0854807
	760.812	0.0658981	0.175532	0.142586	0.113691	0.0727476	0.0740421
	759.014	0.0607805	0.169843	0.120883	0.0932573	0.0731501	0.0660698
	757.215	0.0673978	0.144964	0.121378	0.0833574	0.0625986	0.0635802
	755.416	0.0618412	0.116008	0.0953629	0.0807811	0.0707991	0.0655016
	753.615	0.0439356	0.123677	0.0955344	0.0556411	0.0527229	0.0536117
	751.814	0.0536507	0.0720118	0.0895894	0.0586413	0.0400336	0.0518106
	750.014	0.0433805	0.0726135	0.0730344	0.0584617	0.0323479	0.0406797
	748.213	0.0348786	0.0677728	0.0543398	0.0408039	0.0281512	0.0496136
	746.41	0.0271194	0.0796346	0.0649535	0.0306448	0.0343368	0.028627
	744.609	0.0391803	0.0647614	0.0384088	0.0345731	0.0295027	0.0425005
	742.807	0.0325466	0.0572022	0.047387	0.0281765	0.0112397	0.0243393
	741.004	0.0228133	0.0612529	0.0565902	0.0186264	0.0151591	0.0279753
	739.201	0.0226811	0.0454003	0.0339832	0.0196708	0.0137196	0.0280416
	737.396	0.0221443	0.0411022	0.0451999	0.0125135	0.0157532	0.0218787
	735.594	0.0280673	0.0380846	0.0419375	0.0273058	0.0242635	0.0228721
	733.789	0.0267801	0.0396491	0.0324387	0.0251162	0.03316	0.0335696
	731.984	0.0331137	0.0513156	0.0442123	0.016609	0.0254964	0.0260355
	730.18	0.0284226	0.0300223	0.0220297	0.0181316	0.0316027	0.034017
	728.373	0.0274932	0.0268288	0.0345001	0.02171	0.035649	0.0343163
	726.566	0.0316434	0.0334642	0.0164753	0.0165875	0.0244437	0.0351709
	724.762	0.0176265	0.0489044	0.00829793	0.0227689	0.0195253	0.0388288
	722.955	0.0209418	0.0465693	0.0291546	0.0155688	0.0182134	0.0319225
	721.146	0.0288655	0.0380224	0.0247592	0.0217316	0.0216809	0.0232959
	719.34	0.0186292	0.0358917	0.0173966	0.00968038	0.00960484	0.0221982
	717.531	0.0104664	0.032883	0.0246953	0.00190514	0.0156316	0.0256019
	715.723	0.0157865	0.0540061	0.0402504	0.0159848	0.00115831	0.0200012
	713.914	0.0233662	0.0552259	0.0333291	0.000922476	0.0166108	0.0263905
	712.105	0.0103958	0.0323128	0.0283646	0.00550427	0.00200987	0.0289951
	710.297	0.010019	0.0699706	0.0337443	0.00762821	0.0174276	0.0320177
	708.486	0.0279085	0.0429881	0.0406388	0.00725535	0.00904396	0.0327885
	706.676	0.0245044	0.0710558	0.0478864	0.011744	0.0129758	0.031092
	704.865	0.0183681	0.0518974	0.0381211	0.0163888	0.0145773	0.0234328
	703.055	0.0185668	0.0685803	0.0349808	0.00821602	0.0136738	0.0194233
	701.242	0.0151828	0.0930911	0.0491298	0.0193637	0.0213686	0.0291941
	699.432	-0.00285981	0.122352	0.0557178	0.0335957	0.0319432	0.0230656
	697.619	0.0157313	0.132894	0.0891089	0.0387609	0.0256917	0.0325426
	695.807	0.0360046	0.154911	0.110191	0.0567879	0.0359685	0.0303151
	693.992	0.0391447	0.187844	0.124098	0.0607976	0.0517418	0.0558777
	692.18	0.0465876	0.192807	0.139403	0.0802733	0.0539673	0.0439761
	690.365	0.0374667	0.186506	0.137397	0.0768072	0.0529924	0.0431678
	688.551	0.0377623	0.15191	0.113439	0.0611301	0.0384459	0.0342246
	686.736	0.0321602	0.114876	0.0934504	0.0612486	0.0385459	0.0360662
	684.922	0.018914	0.135863	0.08135	0.049952	0.0322385	0.0282648
	683.107	0.033243	0.128371	0.0690491	0.0486584	0.0228068	0.0255862
	681.291	0.0191399	0.143673	0.0864443	0.0467574	0.0226954	0.0222907
	679.475	0.0188783	0.159714	0.0792882	0.0497859	0.0279666	0.0278146
	677.658	0.019555	0.158989	0.107741	0.0487534	0.0345786	0.0327463
	675.842	0.0199659	0.213343	0.125134	0.0636744	0.0495345	0.0460321
	674.023	0.0251902	0.255404	0.135732	0.0714834	0.0405694	0.0434107
	672.205	0.0405385	0.259796	0.147242	0.0848953	0.0384614	0.0491366
	670.387	0.0337529	0.257619	0.147615	0.0692695	0.0343143	0.0582439
	668.568	0.0319917	0.234409	0.142328	0.0766375	0.0265915	0.0374974
	666.75	0.0247823	0.206604	0.122511	0.0783226	0.0356481	0.0406493
	664.93	0.0206537	0.169275	0.0973048	0.060247	0.0255446	0.0433678
	663.111	0.0235809	0.162863	0.0912748	0.0474165	0.0176542	0.0316471
	661.291	0.0217241	0.160966	0.0716847	0.0493599	0.0231056	0.0184643
	659.471	0.0337968	0.150501	0.0939987	0.0445461	0.017626	0.0206515
	657.648	0.0365085	0.151483	0.0889487	0.0370058	0.0316478	0.0230657
	655.828	0.0234582	0.159488	0.0972269	0.058315	0.0424339	0.0359824
	654.006	0.0204868	0.133357	0.0926051	0.0542575	0.0352942	0.0409379
	652.184	0.0245444	0.156502	0.121243	0.0538715	0.0485508	0.0318034
	650.361	0.0329326	0.173843	0.139947	0.0756648	0.0518056	0.0357496
	648.537	0.0306716	0.173118	0.136352	0.0858008	0.0641598	0.0470928
	646.715	0.0462343	0.202498	0.161849	0.0909559	0.0771317	0.0536294
	644.891	0.055032	0.22633	0.166577	0.10028	0.0810421	0.0655129
	643.066	0.062316	0.238625	0.204698	0.113006	0.0809028	0.0676824
	641.242	0.0529112	0.247111	0.196361	0.112663	0.0857353	0.0713779
	639.418	0.0592142	0.244314	0.219879	0.122739	0.0894259	0.0616001
	637.592	0.0710263	0.240118	0.203614	0.107944	0.0866111	0.070888
	635.766	0.0552275	0.216275	0.183985	0.112635	0.0798472	0.0537061
	633.939	0.0524404	0.189906	0.182775	0.106764	0.0814377	0.054416
	632.113	0.0426826	0.194619	0.164372	0.0898858	0.0684963	0.0499075
	630.287	0.0501929	0.180321	0.151468	0.103934	0.0709599	0.0538506
	628.459	0.0457552	0.179712	0.137575	0.0949116	0.0607077	0.055252
	626.631	0.0402723	0.173935	0.136718	0.0991269	0.0651304	0.0436667
	624.803	0.0439098	0.160352	0.144295	0.0815282	0.0635718	0.042166
	622.975	0.0525745	0.201099	0.141328	0.0957948	0.05074	0.0448591
	621.145	0.0427653	0.211804	0.171592	0.106591	0.0678979	0.0433392
	619.316	0.0557723	0.229925	0.155568	0.126888	0.0775846	0.0616398
	617.486	0.0586084	0.265761	0.183942	0.125792	0.0804877	0.0670228
	615.656	0.0557057	0.271928	0.195392	0.131554	0.0821838	0.0606266
	613.826	0.0698153	0.292672	0.204511	0.143206	0.0949059	0.060523
	611.994	0.0505881	0.247444	0.195782	0.139824	0.0836565	0.0691711
	610.162	0.0563145	0.240297	0.190555	0.129264	0.059341	0.0466251
	608.332	0.033974	0.218817	0.135157	0.0866332	0.0463107	0.0489669
	606.5	0.0210274	0.170302	0.112465	0.0770665	0.0401393	0.0340305
	604.666	0.0271904	0.15424	0.0992745	0.0503204	0.0228781	0.033488
	602.834	0.0209553	0.12434	0.0856217	0.0341835	0.0135157	0.0222105
	601	0.0196653	0.126658	0.0837653	0.0318997	0.0143232	0.011413
	599.166	0.024693	0.110253	0.0790526	0.0162298	0.00286273	0.0225302
	597.332	0.0241198	0.0871143	0.0519857	0.00836297	0.00247942	0.0135605
	595.498	0.0113736	0.051828	0.0361234	-0.000933257	-0.0120205	-0.0043604
	593.662	0.00454076	0.00901763	-0.0184573	-0.000442771	-0.0233697	-0.00689989
	591.826	-0.0043013	-0.0337866	-0.0362685	-0.0287283	-0.0350022	-0.0179753
	589.992	-0.0146122	-0.0685244	-0.0691409	-0.0466591	-0.0287398	-0.0240298
	588.154	-0.0100634	-0.0866642	-0.0621179	-0.058688	-0.0369001	-0.0213812
	586.318	-0.0125343	-0.0856047	-0.0699177	-0.0595196	-0.0409767	-0.00903681
	584.48	-0.023582	-0.0827177	-0.073779	-0.0538019	-0.0453684	-0.0176386
	582.645	-0.016914	-0.0957527	-0.0734849	-0.0609268	-0.0317308	-0.0178657
	580.807	-0.00556832	-0.094018	-0.0599884	-0.0499723	-0.0269803	-0.0138988
	578.969	-0.0205965	-0.0791642	-0.0561958	-0.0579272	-0.0276493	-0.0158852
	577.129	-0.00795011	-0.0689834	-0.0516818	-0.0401187	-0.0204465	-0.0162229
	575.291	-0.00312955	-0.027913	-0.0319616	-0.0273494	-0.0172071	-0.011033
	573.451	-0.0161096	-0.0468078	-0.0483755	-0.0376127	-0.0221339	-0.00573302
	571.611	0.000560829	-0.0507702	-0.0247085	-0.0141893	-0.0121123	0.00310385
	569.771	0.0114448	-0.0205539	-0.0168796	-0.00189752	-0.0035236	0.000572576
	567.93	0.00374867	-0.0147077	-0.0076533	-0.00561418	-0.00318665	0.000468196
	566.09	0.00118514	-0.00961418	-0.0227583	0.000888218	-0.011962	0.0105414
	564.248	0.00691778	-0.00502494	-0.0114083	-0.010289	-0.0134907	-0.00158396
	562.406	0.00148384	-0.0217742	-0.00415779	-0.0167195	-0.0082661	0.00220967
	560.562	0.00435066	-0.000130742	-0.00591813	-0.00172555	0.00122483	-0.00151714
	558.721	-0.00172307	-0.00814296	-0.00360784	-0.01994	-0.00767583	0.00764539
	556.877	0.00455836	-0.00332103	0.00534929	0.00406073	-0.00540532	0.00648904
	555.033	0.00803432	0.0124564	0.0104525	0.00379463	0.00465777	0.0013035
	553.189	0.00794998	0.0298331	0.0294824	0.013709	0.00207141	0.00496732
	551.346	0.0196224	0.0391167	0.049238	0.0141368	0.00350529	0.0157929
	549.502	0.00985335	0.0297466	0.0302359	0.00951641	0.00708579	0.016979
	547.656	0.0146709	0.043127	0.0451014	-0.00195685	0.0123238	0.00490991
	545.811	0.0135813	0.0334918	0.0374994	0.00824331	0.0128324	0.0085136
	543.965	0.0155573	0.0436298	0.0393541	0.0233479	0.0062061	0.0162371
	542.119	0.00789128	0.0299407	0.0434293	0.0143387	0.0173935	0.0111099
	540.271	0.0203252	0.0342969	0.0316112	0.0140027	0.0210609	0.00714828
	538.424	0.0218861	0.0270853	0.0390266	0.0181756	0.014726	0.0108676
	536.576	0.0254179	0.0325691	0.0403192	0.0216351	0.0167602	0.00763669
	534.729	0.0285104	0.029132	0.0146097	0.0283446	0.021571	0.0157069
	532.881	0.0223429	0.00472857	0.0304108	0.0177467	0.0295143	0.00721798
	531.031	0.0158886	-0.00246925	0.0364944	0.0162615	0.0148243	0.015918
	529.184	0.00876783	-0.0121438	0.0121554	0.0141743	0.00661925	0.0082728
	527.334	0.0265016	-0.0247841	0.00684443	0.00536997	0.00396798	0.0116181
	525.482	0.00724802	-0.0136224	0.0005067	0.00749929	0.00163086	0.00828173
	523.633	0.0130836	-0.0378489	-0.0129498	0.000128169	0.00406081	0.000664375
	521.781	0.0205987	-0.0418948	-0.00736774	0.00402143	-0.00961375	0.00488403
	519.932	0.00854911	-0.0384409	-0.000450909	-8.57081e-05	-0.0026121	0.0023192
	518.078	0.00317912	-0.0133944	0.00896793	0.00768952	-0.00432401	-0.00180321
	516.227	0.0201725	0.0052373	0.0211764	0.0108192	0.0043866	0.00460947
	514.375	0.0120313	0.0265734	0.0342573	0.0239944	0.0153875	0.0171173
	512.521	0.0183438	0.037669	0.0632512	0.0255178	0.00700241	0.00971439
	510.668	0.0232687	0.0474773	0.061365	0.0376769	0.0188472	0.0204747
	508.814	0.020783	0.0997484	0.076743	0.058463	0.019624	0.0297757
	506.961	0.0103393	0.115336	0.103979	0.0580125	0.0242296	0.0283924
	505.105	0.0280378	0.158951	0.126864	0.0673676	0.0390514	0.029657
	503.252	0.0256036	0.199256	0.166044	0.0912834	0.0448046	0.0452579
	501.396	0.0475108	0.249589	0.191903	0.0976737	0.0438894	0.0500787
	499.541	0.0439975	0.301723	0.211978	0.108777	0.0546047	0.0564018
	497.684	0.0521611	0.309071	0.215863	0.133859	0.0698113	0.0751765
	495.828	0.0639915	0.328088	0.230689	0.129313	0.073562	0.0729223
	493.971	0.0584235	0.325547	0.222958	0.140947	0.0792584	0.0784863
	492.113	0.0443623	0.292196	0.227182	0.135053	0.0723724	0.0671567
	490.256	0.0553739	0.270896	0.207033	0.132596	0.0657219	0.0557869
	488.398	0.0501433	0.258449	0.186932	0.116433	0.0615659	0.0654668
	486.539	0.0523603	0.216598	0.170496	0.115078	0.0587437	0.0544256
	484.68	0.0543643	0.199753	0.166335	0.105798	0.0532381	0.053613
	482.82	0.0379329	0.168863	0.135175	0.116175	0.0623237	0.0379836
	480.961	0.0375663	0.156852	0.127712	0.0867184	0.0523714	0.036795
	479.102	0.0411211	0.147413	0.109319	0.0808301	0.0497269	0.0347575
	477.24	0.0336594	0.134632	0.0867389	0.0722815	0.0495387	0.0373935
	475.379	0.0335269	0.114858	0.100902	0.0554838	0.0433398	0.035041
	473.518	0.0276393	0.0991613	0.104808	0.0711166	0.0449584	0.0362445
	471.656	0.0405329	0.119886	0.112689	0.0782208	0.0460403	0.0360773
	469.793	0.0424514	0.135716	0.121776	0.0798162	0.0457609	0.0420893
	467.932	0.0473113	0.159769	0.157272	0.086908	0.0562542	0.0442127
	466.068	0.0414089	0.206972	0.154989	0.0922835	0.0593659	0.0506907
	464.205	0.0374917	0.212761	0.176387	0.105786	0.0646239	0.0563756
	462.34	0.0537566	0.22533	0.179736	0.108141	0.0627758	0.0534923
	460.477	0.0480772	0.213378	0.173456	0.104615	0.0507658	0.0574431
	458.611	0.0425157	0.193616	0.167629	0.101043	0.0552324	0.0457057
	456.746	0.0397696	0.172156	0.140297	0.100217	0.0576908	0.0449931
	454.881	0.0298909	0.140628	0.118005	0.0755571	0.0415549	0.0505417
	453.014	0.0347442	0.134742	0.119784	0.0727206	0.0433393	0.0378154
	451.148	0.0306489	0.101827	0.111422	0.0765898	0.0484525	0.0402549
	449.281	0.0284191	0.113365	0.104582	0.0622998	0.049514	0.0346893
	447.414	0.0258608	0.108508	0.106311	0.0628111	0.034184	0.0311344
	445.547	0.0231309	0.0847273	0.0839436	0.0604532	0.035635	0.0262834
	443.678	0.0241767	0.0787816	0.089905	0.0529454	0.0435555	0.029192
	441.811	0.0263156	0.0758433	0.0870803	0.0658238	0.050078	0.0322511
	439.941	0.0270757	0.0851751	0.0823276	0.0661217	0.0357122	0.0359804
	438.072	0.0246216	0.0880636	0.0899258	0.0738295	0.0452596	0.0335087
	436.201	0.0261131	0.0998057	0.101653	0.0754192	0.0402284	0.0422508
	434.332	0.0208102	0.0867993	0.0986733	0.066576	0.0442242	0.0372812
	432.461	0.0197292	0.0815979	0.0773242	0.0578477	0.0286133	0.0358992
	430.59	0.0284533	0.0734225	0.069545	0.0484281	0.021522	0.0234209
	428.719	0.0106397	0.0483466	0.0386356	0.0364746	0.0140028	0.0155272
	426.848	0.0124201	0.0246727	0.0327971	0.0204678	0.00796146	0.0136987
	424.975	0.00309932	0.0209696	0.0238338	0.0175344	0.00115386	0.0221541
	423.104	0.000593659	0.0106316	-0.000928478	0.00354923	-0.00222306	0.006441
	421.23	-0.00704274	0.00912026	0.00439458	0.000478125	-0.00739559	0.00327127
	419.355	-0.00171633	-0.0154455	-0.0103761	-0.00225495	-0.00795895	0.00547413
	417.482	-0.00168066	-0.0159468	0.00238646	-0.0109213	-0.0128513	0.000414213
	415.607	-0.0080051	-0.0211352	-0.0139738	-0.0180508	-0.0146773	-0.00265576
	413.734	-0.0117098	-0.0313376	-0.0159312	-0.0124751	-0.0129192	-0.00282238
	411.859	-0.0153244	-0.0355852	-0.00581519	-0.01621	-0.00665037	6.68336e-05
	409.982	-0.00195153	-0.00968439	-0.0109819	-0.0127964	-0.0147404	0.00287932
	408.107	0.00100006	-0.00241707	-0.0125415	-0.0118536	0.00439707	-0.000541187
	406.23	-0.0067812	0.00196192	0.00165988	-0.00611663	-0.00877046	0.000325617
	404.354	-0.00550787	0.00493808	0.0125544	-0.0104788	0.00620879	0.00243237
	402.477	-0.00416755	0.0287097	0.0134013	0.00768434	0.00730781	0.00911111
	400.6	0.00869617	0.059235	0.0195334	0.021263	0.0137217	0.0125217
	398.721	0.0138359	0.0694446	0.0426296	0.0312214	0.0139169	0.0202352
	396.844	0.00869953	0.0469007	0.0520732	0.0264597	0.0172008	0.0190374
	394.965	0.0142829	0.0605034	0.0648884	0.0333272	0.0212976	0.0118848
	393.084	0.011067	0.0484987	0.0467669	0.0279858	0.0166872	0.0139191
	391.205	0.0104999	0.0427361	0.0379246	0.0175589	0.0171248	0.0164497
	389.324	0.00276992	0.0231993	0.0198436	0.0162047	0.00613682	0.00307232
	387.445	0.00226026	0.0290368	0.0179936	0.00716093	0.00328125	0.0149525
	385.564	0.00534111	0.0207975	0.0177755	0.00490836	-0.000289289	0.00202303
	383.682	0.00831069	0.0424168	0.0211124	0.0034232	0.00728518	0.0058592
	381.801	0.00385633	0.0406537	0.0148704	8.79123e-05	0.00850317	0.0124633
	379.918	-0.00332805	0.0456174	0.0257856	0.0138129	0.00993659	0.0123746
	378.035	0.00623396	0.0551965	0.0282074	0.00938669	0.0116421	0.00811222
	376.152	0.0101257	0.0395794	0.0187501	0.021376	0.00518056	0.0088475
	374.27	0.0037612	0.0375115	0.0185958	0.0141813	0.00042505	-0.00172174
	372.385	0.00607446	0.0364216	0.020964	0.0128864	-0.00101864	0.00662397
	370.502	0.00487994	0.0149922	0.0115374	0.00373337	0.00533604	0.00468046
	368.617	0.0103257	0.000584318	-0.00626761	0.00989588	0.00463509	0.0074427
	366.732	0.00298533	0.00329301	-0.00631112	-0.00416832	-0.00626961	-0.0049589
	364.846	-0.0121117	-0.00359193	0.000395031	-0.011403	-0.0140354	0.00393243
	362.961	-0.00101154	-0.013435	-0.0190768	-0.0193859	-0.0121314	-0.0097821
	361.074	0.00442174	-0.0216949	-0.0183095	-0.0136705	-0.0121419	0.00355726
	359.188	-0.00987161	-0.0256697	-0.0208334	-0.018724	-0.00849684	-0.0130662
	357.301	-0.00142917	-0.0428707	-0.0348498	-0.0228427	-0.0131487	-0.0119072
	355.412	-0.00907671	-0.0377214	-0.0216449	-0.0171047	-0.00851141	-0.0014445
	353.525	-0.00656283	-0.0338292	-0.0279589	-0.0245039	-0.0164038	-0.00702094
	351.637	-0.000426067	-0.0346327	-0.0261062	-0.0112311	-0.0135646	-0.00100633
	349.748	-0.0039331	-0.0263339	-0.0355748	-0.0130163	-0.0144132	-0.0105717
	347.857	0.000616893	-0.0154888	-0.0150272	-0.0173029	-0.0142586	-0.00788857
	345.969	0.00709052	-0.0248082	-0.0139896	-0.00391429	-0.0177558	-0.0121769
	344.078	-0.00703836	-0.00751365	-0.000838935	-0.00505353	-0.00692175	-0.00443085
	342.188	-0.000474138	-0.00406746	0.0126844	-0.00523708	-0.00490257	0.00462427
	340.297	0.000268154	0.0180067	0.0150827	0.000777832	-7.31604e-07	0.0049444
	338.406	0.000885777	0.00783076	0.00759826	0.00348281	-0.00397866	-0.00373633
	336.514	0.00294473	0.021137	0.00357005	0.00033848	-0.00199207	-0.00101196
	334.621	0.00905423	0.0331969	0.0158862	0.00460963	-0.0107962	0.00854984
	332.729	0.00305143	0.0309245	-0.000653551	0.00208685	-0.00531301	0.00466155
	330.836	0.0119743	0.00132601	0.00953798	0.00518821	-0.00319063	-0.00183245
	328.941	0.0117545	0.00446351	-0.00614515	0.0028553	-0.00133724	-0.00293761
	327.049	0.00770348	-0.0203595	-0.0230117	-0.0109207	0.000666813	-0.00501978
	325.154	0.00886268	-0.0235752	-0.021303	0.00242728	0.0115858	-0.00241822
	323.26	0.00591673	-0.0224162	-0.0125663	-0.00577962	0.000988744	0.00226746
	321.363	0.00876366	-0.0175292	-0.0155276	-0.00576471	-0.00065413	0.0130804
	319.469	0.0162696	-0.0153575	-0.0153635	-0.00439064	0.00290933	0.0017295
	317.572	0.0239634	-0.0150391	-0.00984779	-0.00603617	0.00849831	0.014183
	315.676	0.018328	-0.00134411	-0.00444213	0.00388994	-0.00030196	0.0082268
	313.779	0.0377199	-0.00104808	-0.00130956	0.00466356	0.00961314	0.0180244
	311.883	0.0312946	-0.00292767	0.000706364	-0.00343495	0.0199433	0.0166675
	309.984	0.0306635	0.00156749	0.00354326	-0.000554988	0.018454	0.0186142
	308.086	0.0369363	-0.016686	0.0088017	0.000899044	0.0105604	0.0220667
	306.188	0.0444261	-0.0054894	0.00608997	0.0062549	0.0207809	0.0307755
	304.289	0.042841	-0.00312353	0.0040438	0.0115316	0.0346028	0.0335318
	302.389	0.0549603	-0.00801028	-0.00200649	0.0143924	0.0315739	0.02532

## Sheet: Figure S1
Wavelength	Synthesis 1	Synthesis 2	Synthesis 3	Synthesis 4	Synthesis 5	Synthesis 6	Synthesis 7
800	0.013774	0.01355	0.005435	0.002747	0.015209	0.007874	0.019011
799	0.013774	0.01355	0.005435	0.002747	0.015209	0.007874	0.019011
798	0.013774	0.01355	0.005435	0.002747	0.015209	0.007874	0.019011
797	0.013774	0.01355	0.005435	0.002747	0.015209	0.007874	0.019011
796	0.013774	0.01355	0.005435	0.002747	0.015209	0.007874	0.019011
795	0.013774	0.01355	0.005435	0.002747	0.015209	0.007874	0.019011
794	0.013774	0.01355	0.005435	0.002747	0.015209	0.007874	0.019011
793	0.013774	0.01355	0.005435	0.002747	0.015209	0.007874	0.019011
792	0.013774	0.01355	0.005435	0.002747	0.015209	0.007874	0.019011
791	0.013774	0.01355	0.005435	0.002747	0.015209	0.007874	0.019011
790	0.013774	0.01355	0.005435	0.002747	0.015209	0.007874	0.019011
789	0.013774	0.01355	0.005435	0.002747	0.015209	0.007874	0.019011
788	0.013774	0.01355	0.005435	0.002747	0.015209	0.007874	0.019011
787	0.013774	0.01355	0.005435	0.002747	0.015209	0.007874	0.019011
786	0.013774	0.01355	0.005435	0.002747	0.015209	0.007874	0.019011
785	0.013774	0.01355	0.005435	0.002747	0.015209	0.007874	0.019011
784	0.013774	0.01355	0.005435	0.002747	0.015209	0.007874	0.019011
783	0.013774	0.01355	0.005435	0.002747	0.015209	0.007874	0.019011
782	0.013774	0.01355	0.005435	0.002747	0.015209	0.007874	0.019011
781	0.013774	0.01355	0.005435	0.002747	0.015209	0.007874	0.019011
780	0.013774	0.01355	0.005435	0.002747	0.015209	0.007874	0.019011
779	0.013774	0.01355	0.005435	0.002747	0.015209	0.007874	0.019011
778	0.013774	0.01355	0.005435	0.002747	0.015209	0.007874	0.019011
777	0.013774	0.01355	0.005435	0.002747	0.015209	0.007874	0.019011
776	0.013774	0.01355	0.005435	0.002747	0.015209	0.007874	0.019011
775	0.013774	0.01355	0.005435	0.002747	0.015209	0.007874	0.019011
774	0.013774	0.01355	0.005435	0.002747	0.015209	0.007874	0.019011
773	0.013774	0.01355	0.005435	0.002747	0.015209	0.007874	0.019011
772	0.013774	0.01355	0.005435	0.002747	0.015209	0.007874	0.019011
771	0.013774	0.01355	0.005435	0.002747	0.015209	0.007874	0.019011
770	0.013774	0.01355	0.005435	0.002747	0.015209	0.007874	0.019011
769	0.013774	0.01355	0.005435	0.002747	0.015209	0.007874	0.019011
768	0.013774	0.01355	0.005435	0.002747	0.015209	0.007874	0.019011
767	0.013774	0.01355	0.005435	0.002747	0.015209	0.007874	0.019011
766	0.013774	0.01355	0.005435	0.002747	0.015209	0.007874	0.019011
765	0.013774	0.01355	0.005435	0.002747	0.015209	0.007874	0.019011
764	0.013774	0.01355	0.005435	0.002747	0.015209	0.007874	0.019011
763	0.013774	0.01355	0.005435	0.002747	0.015209	0.007874	0.019011
762	0.013774	0.01355	0.005435	0.002747	0.015209	0.007874	0.019011
761	0.013774	0.01355	0.005435	0.002747	0.015209	0.007874	0.019011
760	0.013774	0.01355	0.005435	0.002747	0.015209	0.007874	0.019011
759	0.013774	0.01355	0.005435	0.002747	0.015209	0.003937	0.019011
758	0.013774	0.01355	0.005435	0.002747	0.015209	0.007874	0.019011
757	0.013774	0.01355	0.005435	0.002747	0.015209	0.003937	0.019011
756	0.013774	0.01355	0.005435	0.002747	0.015209	0.003937	0.019011
755	0.013774	0.01355	0.005435	0.002747	0.015209	0.003937	0.019011
754	0.013774	0.01355	0.005435	0.002747	0.015209	0.003937	0.019011
753	0.013774	0.01355	0.005435	0.002747	0.015209	0.003937	0.019011
752	0.013774	0.01355	0.005435	0.002747	0.015209	0.003937	0.019011
751	0.013774	0.01355	0.005435	0.002747	0.015209	0.003937	0.019011
750	0.013774	0.01355	0.008152	0.002747	0.015209	0.003937	0.019011
749	0.013774	0.01355	0.008152	0.002747	0.015209	0.003937	0.019011
748	0.013774	0.01355	0.005435	0.002747	0.015209	0.003937	0.019011
747	0.013774	0.01355	0.008152	0.002747	0.015209	0.003937	0.019011
746	0.013774	0.01355	0.008152	0.002747	0.015209	0.003937	0.019011
745	0.013774	0.01355	0.008152	0.002747	0.015209	0.003937	0.019011
744	0.013774	0.01355	0.008152	0.002747	0.015209	0.003937	0.019011
743	0.013774	0.01355	0.008152	0.002747	0.015209	0.003937	0.019011
742	0.013774	0.01355	0.008152	0.002747	0.015209	0.003937	0.015209
741	0.013774	0.01355	0.008152	0.002747	0.015209	0.003937	0.015209
740	0.013774	0.01355	0.008152	0.002747	0.015209	0.003937	0.015209
739	0.013774	0.01355	0.008152	0.002747	0.015209	0.003937	0.015209
738	0.013774	0.01355	0.008152	0.002747	0.015209	0.003937	0.015209
737	0.013774	0.01355	0.008152	0.002747	0.015209	0.003937	0.015209
736	0.013774	0.01355	0.008152	0.002747	0.015209	0.003937	0.015209
735	0.013774	0.01355	0.008152	0.002747	0.015209	0.003937	0.015209
734	0.013774	0.01355	0.008152	0.002747	0.015209	0.003937	0.015209
733	0.013774	0.01355	0.008152	0.002747	0.015209	0.003937	0.015209
732	0.013774	0.01355	0.008152	0.002747	0.015209	0.003937	0.015209
731	0.013774	0.01355	0.008152	0.002747	0.015209	0.003937	0.015209
730	0.013774	0.01355	0.008152	0.002747	0.015209	0.003937	0.015209
729	0.013774	0.01355	0.008152	0.002747	0.015209	0.003937	0.015209
728	0.013774	0.01355	0.008152	0.002747	0.015209	0.003937	0.015209
727	0.013774	0.01355	0.008152	0.002747	0.015209	0.003937	0.015209
726	0.013774	0.01355	0.008152	0.002747	0.015209	0.003937	0.015209
725	0.013774	0.01355	0.008152	0.002747	0.015209	0.003937	0.015209
724	0.013774	0.01355	0.008152	0.002747	0.015209	0.003937	0.015209
723	0.013774	0.01084	0.008152	0.002747	0.015209	0.003937	0.015209
722	0.013774	0.01084	0.008152	0.002747	0.015209	0.003937	0.015209
721	0.013774	0.01084	0.008152	0.002747	0.015209	0.003937	0.015209
720	0.013774	0.01084	0.008152	0.002747	0.015209	0.003937	0.015209
719	0.013774	0.01084	0.008152	0.002747	0.015209	0.003937	0.015209
718	0.013774	0.01084	0.008152	0.002747	0.015209	0.003937	0.015209
717	0.013774	0.01084	0.008152	0.002747	0.015209	0.003937	0.015209
716	0.013774	0.01084	0.008152	0.002747	0.015209	0.003937	0.015209
715	0.013774	0.01084	0.008152	0.002747	0.015209	0.003937	0.015209
714	0.013774	0.01084	0.008152	0.002747	0.015209	0.003937	0.015209
713	0.013774	0.01084	0.008152	0.002747	0.015209	0.003937	0.015209
712	0.013774	0.01084	0.008152	0.002747	0.015209	0.003937	0.015209
711	0.013774	0.01084	0.008152	0.002747	0.015209	0.003937	0.015209
710	0.013774	0.01084	0.008152	0.002747	0.015209	0.003937	0.015209
709	0.013774	0.01084	0.008152	0.002747	0.015209	0.003937	0.015209
708	0.013774	0.01084	0.008152	0.002747	0.015209	0.003937	0.015209
707	0.013774	0.01084	0.008152	0.002747	0.015209	0.003937	0.015209
706	0.013774	0.01084	0.008152	0.002747	0.015209	0.003937	0.015209
705	0.013774	0.01084	0.008152	0.002747	0.015209	0	0.015209
704	0.013774	0.01084	0.008152	0.002747	0.015209	0	0.011407
703	0.013774	0.01084	0.008152	0.002747	0.015209	0	0.011407
702	0.013774	0.01084	0.008152	0.002747	0.015209	0	0.011407
701	0.013774	0.01084	0.008152	0.002747	0.015209	0	0.011407
700	0.013774	0.01084	0.008152	0.002747	0.015209	0	0.011407
699	0.013774	0.01084	0.008152	0.002747	0.015209	0	0.011407
698	0.013774	0.01084	0.008152	0.002747	0.015209	0	0.011407
697	0.013774	0.01084	0.008152	0.002747	0.015209	0	0.011407
696	0.013774	0.01084	0.008152	0.002747	0.015209	0	0.011407
695	0.013774	0.01084	0.008152	0.002747	0.015209	0	0.011407
694	0.013774	0.01084	0.008152	0.002747	0.015209	0	0.011407
693	0.013774	0.01084	0.008152	0.002747	0.015209	0	0.011407
692	0.013774	0.01084	0.008152	0.002747	0.015209	0	0.011407
691	0.013774	0.01084	0.008152	0.002747	0.015209	0	0.011407
690	0.013774	0.01084	0.008152	0.002747	0.015209	0	0.011407
689	0.013774	0.01084	0.008152	0.002747	0.015209	0	0.011407
688	0.013774	0.01084	0.008152	0.002747	0.015209	0	0.011407
687	0.013774	0.01084	0.008152	0.002747	0.015209	0	0.011407
686	0.013774	0.01084	0.008152	0.002747	0.015209	0	0.011407
685	0.013774	0.01084	0.008152	0.002747	0.015209	0	0.011407
684	0.013774	0.01084	0.008152	0.005495	0.015209	0	0.011407
683	0.013774	0.01084	0.008152	0.005495	0.015209	0	0.011407
682	0.013774	0.01084	0.008152	0.005495	0.015209	0	0.011407
681	0.013774	0.01084	0.008152	0.005495	0.015209	0	0.011407
680	0.013774	0.01084	0.008152	0.005495	0.015209	0	0.011407
679	0.013774	0.01084	0.008152	0.005495	0.015209	0	0.011407
678	0.013774	0.01084	0.008152	0.005495	0.015209	0	0.011407
677	0.013774	0.01084	0.008152	0.005495	0.015209	0	0.011407
676	0.013774	0.01084	0.008152	0.005495	0.015209	0	0.011407
675	0.013774	0.01084	0.008152	0.005495	0.015209	0	0.011407
674	0.013774	0.01084	0.008152	0.005495	0.015209	0	0.011407
673	0.013774	0.01084	0.008152	0.005495	0.015209	0	0.011407
672	0.013774	0.01084	0.008152	0.005495	0.015209	0	0.011407
671	0.013774	0.01084	0.008152	0.005495	0.015209	0	0.011407
670	0.013774	0.01084	0.008152	0.005495	0.015209	0	0.011407
669	0.013774	0.01084	0.01087	0.005495	0.011407	0	0.011407
668	0.013774	0.01084	0.01087	0.005495	0.015209	0	0.011407
667	0.013774	0.01084	0.01087	0.005495	0.015209	0	0.011407
666	0.013774	0.01084	0.01087	0.005495	0.015209	0	0.011407
665	0.013774	0.01084	0.01087	0.005495	0.011407	0	0.011407
664	0.013774	0.01084	0.01087	0.005495	0.011407	0	0.011407
663	0.013774	0.01084	0.01087	0.005495	0.011407	0	0.011407
662	0.013774	0.01084	0.01087	0.005495	0.015209	0	0.011407
661	0.013774	0.01084	0.01087	0.005495	0.011407	0	0.011407
660	0.013774	0.01084	0.01087	0.005495	0.011407	0	0.011407
659	0.013774	0.01084	0.01087	0.005495	0.011407	0	0.011407
658	0.013774	0.01084	0.01087	0.005495	0.011407	0	0.011407
657	0.013774	0.01084	0.01087	0.005495	0.011407	0	0.011407
656	0.013774	0.01084	0.01087	0.005495	0.011407	0	0.011407
655	0.013774	0.01084	0.01087	0.005495	0.011407	0	0.011407
654	0.013774	0.01084	0.01087	0.005495	0.011407	0	0.011407
653	0.013774	0.01084	0.01087	0.005495	0.011407	0	0.011407
652	0.013774	0.01084	0.01087	0.005495	0.011407	0	0.011407
651	0.016529	0.01084	0.01087	0.005495	0.011407	0	0.011407
650	0.016529	0.01084	0.01087	0.005495	0.011407	0	0.011407
649	0.016529	0.01084	0.01087	0.005495	0.011407	0	0.011407
648	0.016529	0.01084	0.01087	0.005495	0.011407	0	0.011407
647	0.016529	0.01084	0.01087	0.005495	0.011407	0	0.011407
646	0.016529	0.01084	0.01087	0.005495	0.011407	0	0.011407
645	0.016529	0.01084	0.01087	0.005495	0.011407	0	0.011407
644	0.016529	0.01084	0.01087	0.005495	0.011407	0	0.011407
643	0.016529	0.01084	0.01087	0.005495	0.011407	0	0.011407
642	0.016529	0.01084	0.01087	0.005495	0.011407	0	0.007605
641	0.016529	0.01084	0.01087	0.005495	0.011407	0	0.011407
640	0.016529	0.01084	0.01087	0.005495	0.011407	0.003937	0.011407
639	0.016529	0.01084	0.01087	0.005495	0.011407	0	0.011407
638	0.016529	0.01084	0.01087	0.005495	0.011407	0.003937	0.007605
637	0.016529	0.01084	0.01087	0.005495	0.011407	0.003937	0.007605
636	0.016529	0.01084	0.01087	0.005495	0.011407	0.003937	0.007605
635	0.016529	0.01084	0.01087	0.005495	0.011407	0.003937	0.007605
634	0.016529	0.01084	0.01087	0.005495	0.011407	0.003937	0.007605
633	0.016529	0.01084	0.01087	0.005495	0.011407	0.003937	0.007605
632	0.016529	0.01084	0.013587	0.005495	0.011407	0.003937	0.007605
631	0.016529	0.01084	0.01087	0.005495	0.011407	0.003937	0.007605
630	0.016529	0.01084	0.013587	0.005495	0.011407	0.003937	0.007605
629	0.016529	0.01084	0.013587	0.005495	0.011407	0.003937	0.007605
628	0.016529	0.01084	0.013587	0.005495	0.011407	0.003937	0.007605
627	0.016529	0.01084	0.013587	0.005495	0.011407	0.003937	0.007605
626	0.016529	0.01084	0.013587	0.008242	0.011407	0.003937	0.007605
625	0.016529	0.01084	0.013587	0.005495	0.011407	0.003937	0.007605
624	0.016529	0.01084	0.013587	0.008242	0.011407	0.003937	0.007605
623	0.019284	0.01084	0.013587	0.008242	0.011407	0.003937	0.007605
622	0.019284	0.01084	0.013587	0.008242	0.011407	0.003937	0.007605
621	0.019284	0.01084	0.013587	0.008242	0.011407	0.003937	0.007605
620	0.019284	0.01084	0.013587	0.008242	0.011407	0.003937	0.007605
619	0.019284	0.01084	0.013587	0.008242	0.011407	0.003937	0.007605
618	0.019284	0.01084	0.013587	0.008242	0.011407	0.003937	0.007605
617	0.019284	0.01084	0.013587	0.008242	0.011407	0.003937	0.007605
616	0.019284	0.01084	0.013587	0.008242	0.011407	0.003937	0.011407
615	0.019284	0.01355	0.013587	0.008242	0.011407	0.003937	0.011407
614	0.019284	0.01355	0.013587	0.008242	0.011407	0.003937	0.011407
613	0.019284	0.01355	0.013587	0.008242	0.011407	0.003937	0.011407
612	0.019284	0.01355	0.013587	0.008242	0.011407	0.003937	0.011407
611	0.019284	0.01355	0.013587	0.008242	0.011407	0.003937	0.011407
610	0.019284	0.01355	0.013587	0.008242	0.011407	0.007874	0.011407
609	0.019284	0.01355	0.013587	0.008242	0.011407	0.007874	0.011407
608	0.019284	0.01355	0.013587	0.008242	0.011407	0.007874	0.011407
607	0.019284	0.01355	0.013587	0.008242	0.011407	0.007874	0.011407
606	0.022039	0.01355	0.013587	0.008242	0.011407	0.007874	0.011407
605	0.022039	0.01355	0.016304	0.008242	0.011407	0.007874	0.011407
604	0.022039	0.01355	0.016304	0.008242	0.011407	0.007874	0.011407
603	0.022039	0.01355	0.016304	0.008242	0.011407	0.007874	0.011407
602	0.022039	0.01355	0.016304	0.008242	0.011407	0.007874	0.011407
601	0.022039	0.01355	0.016304	0.008242	0.011407	0.007874	0.011407
600	0.022039	0.01355	0.016304	0.008242	0.011407	0.007874	0.011407
599	0.022039	0.01355	0.016304	0.008242	0.011407	0.007874	0.011407
598	0.022039	0.01355	0.016304	0.008242	0.011407	0.007874	0.011407
597	0.022039	0.01355	0.016304	0.008242	0.011407	0.007874	0.011407
596	0.022039	0.01355	0.016304	0.008242	0.011407	0.007874	0.011407
595	0.022039	0.01355	0.016304	0.008242	0.011407	0.007874	0.011407
594	0.022039	0.01355	0.016304	0.010989	0.011407	0.007874	0.011407
593	0.024793	0.01355	0.016304	0.010989	0.011407	0.011811	0.011407
592	0.024793	0.01355	0.016304	0.010989	0.011407	0.011811	0.011407
591	0.024793	0.01355	0.016304	0.010989	0.011407	0.011811	0.011407
590	0.024793	0.01355	0.016304	0.010989	0.011407	0.011811	0.011407
589	0.024793	0.01355	0.016304	0.010989	0.011407	0.011811	0.011407
588	0.024793	0.01355	0.016304	0.010989	0.011407	0.011811	0.011407
587	0.024793	0.01626	0.016304	0.010989	0.011407	0.011811	0.011407
586	0.024793	0.01626	0.016304	0.010989	0.011407	0.011811	0.011407
585	0.024793	0.01626	0.019022	0.010989	0.011407	0.011811	0.011407
584	0.024793	0.01626	0.019022	0.010989	0.011407	0.011811	0.011407
583	0.024793	0.01626	0.019022	0.010989	0.011407	0.011811	0.011407
582	0.024793	0.01626	0.019022	0.010989	0.011407	0.011811	0.011407
581	0.024793	0.01626	0.019022	0.010989	0.011407	0.011811	0.011407
580	0.024793	0.01626	0.019022	0.010989	0.007605	0.011811	0.011407
579	0.024793	0.01626	0.019022	0.010989	0.007605	0.011811	0.011407
578	0.024793	0.01626	0.019022	0.010989	0.007605	0.011811	0.011407
577	0.024793	0.01626	0.019022	0.010989	0.007605	0.011811	0.011407
576	0.024793	0.01626	0.019022	0.010989	0.007605	0.007874	0.011407
575	0.024793	0.01626	0.019022	0.010989	0.007605	0.007874	0.011407
574	0.024793	0.01626	0.019022	0.010989	0.007605	0.007874	0.011407
573	0.024793	0.01626	0.019022	0.010989	0.007605	0.007874	0.011407
572	0.024793	0.01626	0.019022	0.010989	0.007605	0.007874	0.011407
571	0.024793	0.01626	0.019022	0.010989	0.007605	0.007874	0.011407
570	0.024793	0.01626	0.021739	0.013736	0.007605	0.007874	0.011407
569	0.024793	0.01626	0.021739	0.013736	0.007605	0.007874	0.011407
568	0.024793	0.01626	0.021739	0.013736	0.007605	0.007874	0.011407
567	0.027548	0.01626	0.021739	0.013736	0.007605	0.007874	0.011407
566	0.027548	0.01626	0.021739	0.013736	0.007605	0.007874	0.011407
565	0.027548	0.01897	0.021739	0.013736	0.007605	0.011811	0.011407
564	0.027548	0.01897	0.021739	0.013736	0.007605	0.011811	0.011407
563	0.027548	0.01897	0.021739	0.013736	0.007605	0.011811	0.015209
562	0.027548	0.01897	0.021739	0.013736	0.007605	0.011811	0.015209
561	0.027548	0.01897	0.021739	0.013736	0.007605	0.011811	0.015209
560	0.030303	0.01897	0.021739	0.013736	0.007605	0.011811	0.015209
559	0.030303	0.01897	0.024457	0.013736	0.007605	0.011811	0.015209
558	0.030303	0.01897	0.024457	0.013736	0.007605	0.011811	0.015209
557	0.030303	0.01897	0.024457	0.016484	0.007605	0.011811	0.015209
556	0.030303	0.02168	0.024457	0.016484	0.007605	0.011811	0.015209
555	0.030303	0.02439	0.027174	0.019231	0.007605	0.011811	0.015209
554	0.030303	0.02168	0.024457	0.016484	0.007605	0.011811	0.015209
553	0.030303	0.02168	0.024457	0.016484	0.007605	0.011811	0.015209
552	0.030303	0.02168	0.024457	0.016484	0.007605	0.011811	0.015209
551	0.030303	0.02168	0.024457	0.016484	0.007605	0.011811	0.015209
550	0.030303	0.02168	0.024457	0.016484	0.007605	0.011811	0.015209
549	0.030303	0.02168	0.024457	0.016484	0.007605	0.011811	0.015209
548	0.030303	0.02168	0.024457	0.016484	0.007605	0.007874	0.015209
547	0.030303	0.02168	0.024457	0.019231	0.007605	0.007874	0.015209
546	0.030303	0.02168	0.024457	0.019231	0.007605	0.007874	0.015209
545	0.030303	0.02168	0.027174	0.019231	0.007605	0.007874	0.015209
544	0.030303	0.02168	0.027174	0.019231	0.007605	0.007874	0.015209
543	0.030303	0.02439	0.027174	0.019231	0.007605	0.007874	0.015209
542	0.030303	0.02439	0.027174	0.019231	0.007605	0.007874	0.015209
541	0.033058	0.02439	0.027174	0.019231	0.007605	0.007874	0.015209
540	0.033058	0.02439	0.027174	0.019231	0.007605	0.007874	0.015209
539	0.033058	0.02439	0.027174	0.019231	0.007605	0.007874	0.015209
538	0.033058	0.02439	0.027174	0.019231	0.007605	0.007874	0.015209
537	0.033058	0.02439	0.027174	0.021978	0.007605	0.011811	0.015209
536	0.033058	0.02439	0.029891	0.021978	0.007605	0.011811	0.015209
535	0.033058	0.0271	0.029891	0.021978	0.007605	0.011811	0.015209
534	0.033058	0.0271	0.029891	0.021978	0.007605	0.011811	0.015209
533	0.035813	0.0271	0.029891	0.021978	0.007605	0.011811	0.015209
532	0.035813	0.0271	0.029891	0.021978	0.011407	0.011811	0.015209
531	0.035813	0.0271	0.029891	0.021978	0.011407	0.011811	0.015209
530	0.035813	0.0271	0.029891	0.024725	0.011407	0.011811	0.019011
529	0.035813	0.0271	0.032609	0.024725	0.011407	0.011811	0.019011
528	0.035813	0.0271	0.032609	0.024725	0.011407	0.011811	0.019011
527	0.035813	0.02981	0.032609	0.024725	0.011407	0.011811	0.019011
526	0.038567	0.02981	0.032609	0.024725	0.011407	0.011811	0.019011
525	0.038567	0.02981	0.032609	0.024725	0.011407	0.011811	0.019011
524	0.038567	0.02981	0.035326	0.027473	0.011407	0.011811	0.019011
523	0.038567	0.02981	0.035326	0.027473	0.011407	0.011811	0.019011
522	0.038567	0.03252	0.035326	0.027473	0.015209	0.015748	0.019011
521	0.041322	0.03252	0.035326	0.027473	0.015209	0.015748	0.019011
520	0.041322	0.03252	0.035326	0.027473	0.015209	0.015748	0.019011
519	0.041322	0.03252	0.038043	0.03022	0.015209	0.015748	0.019011
518	0.041322	0.03252	0.038043	0.03022	0.015209	0.015748	0.022814
517	0.041322	0.03523	0.038043	0.03022	0.015209	0.015748	0.022814
516	0.044077	0.03523	0.038043	0.03022	0.015209	0.015748	0.022814
515	0.044077	0.03523	0.040761	0.032967	0.015209	0.015748	0.022814
514	0.044077	0.03523	0.040761	0.032967	0.019011	0.015748	0.022814
513	0.044077	0.03523	0.040761	0.032967	0.019011	0.015748	0.022814
512	0.044077	0.03794	0.040761	0.032967	0.019011	0.015748	0.022814
511	0.046832	0.03794	0.043478	0.035714	0.019011	0.019685	0.022814
510	0.046832	0.03794	0.043478	0.035714	0.019011	0.019685	0.026616
509	0.046832	0.04065	0.043478	0.035714	0.022814	0.019685	0.026616
508	0.046832	0.04065	0.043478	0.035714	0.022814	0.019685	0.026616
507	0.049587	0.04065	0.046196	0.038462	0.022814	0.019685	0.026616
506	0.049587	0.04065	0.046196	0.038462	0.022814	0.019685	0.026616
505	0.049587	0.04336	0.046196	0.038462	0.022814	0.023622	0.026616
504	0.052342	0.04336	0.048913	0.041209	0.026616	0.023622	0.030418
503	0.052342	0.04336	0.048913	0.041209	0.026616	0.023622	0.030418
502	0.052342	0.04607	0.048913	0.043956	0.026616	0.023622	0.030418
501	0.055096	0.04607	0.05163	0.043956	0.026616	0.023622	0.030418
500	0.055096	0.04607	0.05163	0.043956	0.030418	0.027559	0.030418
499	0.057851	0.04878	0.054348	0.046703	0.030418	0.027559	0.034221
498	0.057851	0.04878	0.054348	0.046703	0.030418	0.027559	0.034221
497	0.057851	0.051491	0.057065	0.049451	0.034221	0.027559	0.034221
496	0.060606	0.051491	0.057065	0.049451	0.038023	0.031496	0.038023
495	0.060606	0.054201	0.059783	0.052198	0.034221	0.031496	0.038023
494	0.066116	0.056911	0.0625	0.054945	0.038023	0.031496	0.038023
493	0.063361	0.056911	0.0625	0.054945	0.038023	0.035433	0.038023
492	0.066116	0.056911	0.0625	0.054945	0.041825	0.035433	0.041825
491	0.068871	0.059621	0.065217	0.057692	0.041825	0.035433	0.041825
490	0.068871	0.059621	0.067935	0.06044	0.041825	0.03937	0.041825
489	0.071625	0.062331	0.067935	0.06044	0.045627	0.03937	0.045627
488	0.07438	0.065041	0.070652	0.063187	0.045627	0.043307	0.045627
487	0.07438	0.067751	0.07337	0.065934	0.04943	0.043307	0.04943
486	0.077135	0.067751	0.07337	0.065934	0.04943	0.043307	0.04943
485	0.07989	0.070461	0.076087	0.068681	0.053232	0.047244	0.053232
484	0.082645	0.073171	0.078804	0.071429	0.053232	0.047244	0.053232
483	0.085399	0.075881	0.081522	0.074176	0.057034	0.051181	0.057034
482	0.088154	0.078591	0.084239	0.076923	0.060837	0.055118	0.057034
481	0.090909	0.081301	0.086957	0.07967	0.060837	0.055118	0.060837
480	0.093664	0.084011	0.089674	0.082418	0.064639	0.059055	0.060837
479	0.096419	0.086721	0.092391	0.085165	0.068441	0.062992	0.064639
478	0.099174	0.089431	0.095109	0.087912	0.068441	0.062992	0.068441
477	0.101928	0.092141	0.100543	0.090659	0.072243	0.066929	0.072243
476	0.107438	0.097561	0.103261	0.096154	0.076046	0.070866	0.072243
475	0.110193	0.100271	0.105978	0.098901	0.079848	0.074803	0.076046
474	0.115702	0.105691	0.111413	0.101648	0.08365	0.074803	0.079848
473	0.118457	0.108401	0.11413	0.107143	0.087452	0.07874	0.08365
472	0.123967	0.113821	0.119565	0.112637	0.091255	0.082677	0.087452
471	0.129477	0.119241	0.125	0.118132	0.095057	0.090551	0.091255
470	0.134986	0.124661	0.130435	0.120879	0.098859	0.094488	0.095057
469	0.137741	0.130081	0.13587	0.126374	0.102662	0.098425	0.098859
468	0.146006	0.135501	0.141304	0.131868	0.110266	0.102362	0.106464
467	0.151515	0.140921	0.146739	0.14011	0.114068	0.106299	0.110266
466	0.157025	0.149051	0.152174	0.145604	0.121673	0.114173	0.117871
465	0.165289	0.154472	0.160326	0.153846	0.125475	0.11811	0.121673
464	0.173554	0.162602	0.168478	0.159341	0.13308	0.125984	0.129278
463	0.181818	0.170732	0.17663	0.17033	0.140684	0.133858	0.136882
462	0.190083	0.178862	0.184783	0.175824	0.148289	0.141732	0.144487
461	0.198347	0.186992	0.192935	0.184066	0.152091	0.145669	0.148289
460	0.206612	0.197832	0.201087	0.195055	0.159696	0.15748	0.155894
459	0.217631	0.208672	0.211957	0.203297	0.171103	0.165354	0.1673
458	0.22865	0.219512	0.222826	0.214286	0.178707	0.173228	0.174905
457	0.239669	0.230352	0.233696	0.225275	0.190114	0.185039	0.186312
456	0.253444	0.243902	0.247283	0.239011	0.197719	0.192913	0.197719
455	0.267218	0.257453	0.26087	0.252747	0.212928	0.204724	0.209125
454	0.280992	0.271003	0.274457	0.266484	0.224335	0.220472	0.220532
453	0.294766	0.284553	0.288043	0.28022	0.235741	0.232283	0.231939
452	0.30854	0.300813	0.30163	0.293956	0.247148	0.244094	0.243346
451	0.325069	0.317073	0.317935	0.31044	0.262357	0.259843	0.258555
450	0.341598	0.333333	0.334239	0.326923	0.277567	0.271654	0.273764
449	0.363636	0.355014	0.353261	0.348901	0.296578	0.291339	0.292776
448	0.38292	0.373984	0.375	0.368132	0.311787	0.311024	0.311787
447	0.404959	0.395664	0.394022	0.39011	0.330798	0.330709	0.330798
446	0.424242	0.417344	0.415761	0.409341	0.34981	0.346457	0.34981
445	0.446281	0.436314	0.4375	0.431319	0.368821	0.366142	0.368821
444	0.465565	0.457995	0.456522	0.450549	0.387833	0.385827	0.387833
443	0.484848	0.479675	0.475543	0.472527	0.406844	0.405512	0.406844
442	0.509642	0.504065	0.5	0.494505	0.429658	0.429134	0.429658
441	0.53168	0.525745	0.524457	0.519231	0.452471	0.452756	0.452471
440	0.556474	0.550136	0.548913	0.543956	0.471483	0.472441	0.475285
439	0.584022	0.577236	0.57337	0.568681	0.498099	0.5	0.501901
438	0.608815	0.604336	0.600543	0.596154	0.524715	0.527559	0.528517
437	0.633609	0.628726	0.625	0.620879	0.551331	0.551181	0.551331
436	0.655647	0.650407	0.646739	0.645604	0.574144	0.574803	0.577947
435	0.680441	0.674797	0.671196	0.667582	0.596958	0.598425	0.60076
434	0.705234	0.701897	0.695652	0.692308	0.623574	0.625984	0.627376
433	0.730028	0.726287	0.720109	0.717033	0.65019	0.649606	0.653992
432	0.752066	0.747967	0.744565	0.741758	0.673004	0.677165	0.676806
431	0.77686	0.772358	0.769022	0.766484	0.69962	0.700787	0.703422
430	0.801653	0.796748	0.793478	0.791209	0.726236	0.728346	0.730038
429	0.823691	0.821138	0.815217	0.813187	0.752852	0.755906	0.756654
428	0.842975	0.840108	0.836957	0.835165	0.775665	0.779528	0.779468
427	0.862259	0.859079	0.855978	0.854396	0.794677	0.799213	0.802281
426	0.878788	0.878049	0.872283	0.870879	0.81749	0.818898	0.821293
425	0.895317	0.894309	0.888587	0.887363	0.836502	0.838583	0.844106
424	0.911846	0.910569	0.904891	0.903846	0.855513	0.858268	0.863118
423	0.92562	0.924119	0.921196	0.92033	0.874525	0.877953	0.882129
422	0.942149	0.940379	0.9375	0.936813	0.897338	0.897638	0.901141
421	0.955923	0.95393	0.951087	0.950549	0.912548	0.913386	0.91635
420	0.966942	0.96477	0.961957	0.961538	0.927757	0.929134	0.935361
419	0.975207	0.97561	0.970109	0.96978	0.942966	0.944882	0.946768
418	0.983471	0.98374	0.978261	0.978022	0.954373	0.956693	0.958175
417	0.988981	0.98916	0.986413	0.986264	0.965779	0.964567	0.969582
416	0.99449	0.99458	0.991848	0.991758	0.973384	0.976378	0.977186
415	0.997245	0.99729	0.994565	0.994505	0.980989	0.984252	0.984791
414	1	1	0.997283	0.997253	0.988593	0.988189	0.992395
413	1	1	1	1	0.992395	0.996063	0.996198
412	1	1	0.997283	0.997253	0.996198	1	1
411	0.997245	0.99729	0.994565	0.997253	1	1	1
410	0.99449	0.99458	0.991848	0.994505	1	1	1
409	0.991736	0.98916	0.98913	0.989011	0.996198	1	1
408	0.983471	0.98374	0.983696	0.983516	0.996198	0.996063	0.996198
407	0.977961	0.97561	0.975543	0.975275	0.988593	0.992126	0.992395
406	0.969697	0.96748	0.967391	0.967033	0.984791	0.984252	0.984791
405	0.958678	0.95664	0.959239	0.958791	0.977186	0.980315	0.980989
404	0.947658	0.945799	0.945652	0.947802	0.969582	0.968504	0.969582
403	0.936639	0.934959	0.934783	0.934066	0.958175	0.96063	0.958175
402	0.92562	0.924119	0.923913	0.925824	0.95057	0.948819	0.95057
401	0.914601	0.913279	0.913043	0.914835	0.939163	0.940945	0.939163
400	0.903581	0.899729	0.902174	0.901099	0.927757	0.929134	0.927757
399	0.889807	0.886179	0.888587	0.89011	0.91635	0.917323	0.91635
398	0.878788	0.872629	0.877717	0.876374	0.904943	0.905512	0.901141
397	0.865014	0.861789	0.86413	0.862637	0.889734	0.889764	0.889734
396	0.853994	0.848238	0.850543	0.851648	0.878327	0.877953	0.874525
395	0.84022	0.834688	0.836957	0.837912	0.863118	0.862205	0.859316
394	0.826446	0.821138	0.82337	0.824176	0.847909	0.850394	0.844106
393	0.815427	0.807588	0.8125	0.813187	0.836502	0.838583	0.8327
392	0.801653	0.794038	0.798913	0.799451	0.825095	0.822835	0.81749
391	0.787879	0.780488	0.785326	0.785714	0.809886	0.807087	0.806084
390	0.77686	0.766938	0.774457	0.774725	0.794677	0.795276	0.790875
389	0.763085	0.753388	0.76087	0.758242	0.779468	0.779528	0.775665
388	0.749311	0.737127	0.744565	0.744505	0.764259	0.76378	0.760456
387	0.732782	0.720867	0.728261	0.728022	0.749049	0.748031	0.741445
386	0.716253	0.704607	0.714674	0.711538	0.730038	0.728346	0.722433
385	0.702479	0.691057	0.69837	0.697802	0.714829	0.712598	0.707224
384	0.688705	0.677507	0.684783	0.684066	0.69962	0.700787	0.692015
383	0.674931	0.661247	0.671196	0.67033	0.684411	0.681102	0.676806
382	0.658402	0.644986	0.654891	0.653846	0.669202	0.665354	0.661597
381	0.644628	0.628726	0.638587	0.64011	0.65019	0.649606	0.642586
380	0.630854	0.615176	0.625	0.626374	0.634981	0.633858	0.627376
379	0.614325	0.598916	0.608696	0.60989	0.619772	0.614173	0.612167
378	0.597796	0.582656	0.595109	0.593407	0.60076	0.598425	0.593156
377	0.584022	0.569106	0.578804	0.57967	0.585551	0.582677	0.574144
376	0.570248	0.552846	0.565217	0.565934	0.570342	0.566929	0.558935
375	0.556474	0.542005	0.554348	0.554945	0.555133	0.551181	0.547529
374	0.5427	0.525745	0.540761	0.541209	0.539924	0.535433	0.532319
373	0.528926	0.512195	0.527174	0.527473	0.524715	0.519685	0.51711
372	0.515152	0.498645	0.513587	0.513736	0.509506	0.503937	0.501901
371	0.501377	0.487805	0.502717	0.502747	0.494297	0.488189	0.486692
370	0.487603	0.474255	0.486413	0.489011	0.479087	0.472441	0.471483
369	0.46832	0.457995	0.470109	0.472527	0.460076	0.448819	0.452471
368	0.454545	0.444444	0.456522	0.461538	0.444867	0.433071	0.437262
367	0.443526	0.433604	0.44837	0.450549	0.43346	0.417323	0.425856
366	0.432507	0.422764	0.434783	0.43956	0.422053	0.405512	0.414449
365	0.418733	0.411924	0.423913	0.428571	0.410646	0.389764	0.403042
364	0.407713	0.401084	0.413043	0.417582	0.39924	0.377953	0.391635
363	0.393939	0.390244	0.402174	0.406593	0.387833	0.366142	0.376426
362	0.38292	0.379404	0.388587	0.395604	0.376426	0.354331	0.365019
361	0.371901	0.368564	0.380435	0.384615	0.365019	0.338583	0.353612
360	0.360882	0.355014	0.366848	0.373626	0.34981	0.326772	0.342205
359	0.349862	0.346883	0.355978	0.362637	0.338403	0.314961	0.326996
358	0.341598	0.336043	0.347826	0.354396	0.330798	0.30315	0.319392
357	0.330579	0.325203	0.336957	0.343407	0.319392	0.291339	0.307985
356	0.319559	0.314363	0.326087	0.335165	0.307985	0.279528	0.296578
355	0.30854	0.303523	0.317935	0.324176	0.296578	0.271654	0.281369
354	0.300275	0.295393	0.307065	0.313187	0.285171	0.259843	0.273764
353	0.289256	0.284553	0.296196	0.302198	0.273764	0.248031	0.258555
352	0.278237	0.271003	0.285326	0.291209	0.262357	0.23622	0.247148
351	0.264463	0.257453	0.271739	0.28022	0.247148	0.220472	0.231939
350	0.256198	0.249322	0.263587	0.271978	0.235741	0.212598	0.220532
349	0.245179	0.238482	0.252717	0.260989	0.228137	0.200787	0.212928
348	0.23416	0.227642	0.241848	0.25	0.21673	0.188976	0.197719
347	0.22314	0.214092	0.230978	0.239011	0.201521	0.177165	0.186312
346	0.212121	0.205962	0.220109	0.228022	0.193916	0.169291	0.174905
345	0.201102	0.192412	0.209239	0.21978	0.18251	0.15748	0.163498
344	0.190083	0.184282	0.19837	0.208791	0.171103	0.145669	0.155894
343	0.181818	0.173442	0.1875	0.200549	0.159696	0.137795	0.144487
342	0.170799	0.162602	0.179348	0.18956	0.152091	0.125984	0.13308
341	0.162534	0.154472	0.171196	0.181319	0.140684	0.11811	0.125475
340	0.157025	0.149051	0.163043	0.175824	0.129278	0.110236	0.114068
339	0.151515	0.140921	0.157609	0.167582	0.125475	0.102362	0.106464
338	0.143251	0.135501	0.152174	0.162088	0.121673	0.098425	0.098859
337	0.134986	0.127371	0.146739	0.156593	0.110266	0.090551	0.091255
336	0.132231	0.121951	0.141304	0.151099	0.106464	0.086614	0.087452
335	0.123967	0.113821	0.13587	0.145604	0.098859	0.07874	0.079848
334	0.118457	0.108401	0.130435	0.142857	0.091255	0.074803	0.072243
333	0.115702	0.105691	0.127717	0.137363	0.087452	0.070866	0.068441
332	0.112948	0.100271	0.122283	0.134615	0.08365	0.066929	0.064639
331	0.107438	0.097561	0.119565	0.131868	0.079848	0.062992	0.060837
330	0.104683	0.094851	0.116848	0.129121	0.076046	0.059055	0.057034
329	0.104683	0.094851	0.116848	0.129121	0.072243	0.055118	0.053232
328	0.101928	0.089431	0.11413	0.126374	0.068441	0.055118	0.053232
327	0.099174	0.089431	0.11413	0.126374	0.068441	0.051181	0.04943
326	0.099174	0.089431	0.111413	0.126374	0.064639	0.055118	0.04943
325	0.099174	0.086721	0.111413	0.126374	0.064639	0.051181	0.04943
324	0.096419	0.086721	0.111413	0.123626	0.064639	0.051181	0.04943
323	0.099174	0.089431	0.111413	0.126374	0.060837	0.051181	0.04943
322	0.099174	0.086721	0.111413	0.126374	0.064639	0.051181	0.04943
321	0.099174	0.086721	0.111413	0.129121	0.060837	0.051181	0.04943
320	0.101928	0.089431	0.116848	0.129121	0.060837	0.051181	0.04943
319	0.101928	0.092141	0.116848	0.131868	0.060837	0.055118	0.04943
318	0.101928	0.092141	0.119565	0.131868	0.060837	0.055118	0.04943
317	0.104683	0.092141	0.119565	0.134615	0.060837	0.055118	0.04943
316	0.107438	0.094851	0.122283	0.137363	0.060837	0.055118	0.053232
315	0.110193	0.097561	0.125	0.14011	0.064639	0.059055	0.053232
314	0.110193	0.097561	0.127717	0.142857	0.064639	0.059055	0.053232
313	0.115702	0.100271	0.130435	0.145604	0.064639	0.062992	0.057034
312	0.118457	0.102981	0.13587	0.148352	0.068441	0.066929	0.057034
311	0.121212	0.105691	0.138587	0.151099	0.072243	0.070866	0.060837
310	0.123967	0.105691	0.144022	0.156593	0.072243	0.074803	0.060837
309	0.129477	0.111111	0.149457	0.162088	0.079848	0.082677	0.064639
308	0.134986	0.111111	0.152174	0.162088	0.079848	0.086614	0.068441
307	0.140496	0.116531	0.157609	0.17033	0.087452	0.098425	0.076046
306	0.143251	0.116531	0.160326	0.173077	0.091255	0.098425	0.076046
305	0.151515	0.121951	0.168478	0.178571	0.091255	0.102362	0.076046
304	0.15427	0.124661	0.173913	0.184066	0.095057	0.106299	0.079848
303	0.15978	0.127371	0.179348	0.186813	0.098859	0.114173	0.08365
302	0.168044	0.132791	0.184783	0.192308	0.098859	0.11811	0.087452
301	0.170799	0.135501	0.195652	0.200549	0.102662	0.122047	0.087452
300	0.176309	0.138211	0.201087	0.206044	0.106464	0.129921	0.095057

## Sheet: Figure S2
Figure S2A	Wavelength	Absorbance		Figure S2B	Wavenumber	Intensity
	300	0.4883			102.756	191.949
	301	0.4586			104.077	420.576
	302	0.4325			105.399	304.956
	303	0.4121			106.721	242.901
	304	0.3948			108.041	244.52
	305	0.3784			109.362	382.692
	306	0.3678			110.683	344.214
	307	0.3588			112.003	427.392
	308	0.3513			113.323	766.251
	309	0.3453			114.643	501.921
	310	0.3402			115.963	805.616
	311	0.3357			117.281	653.667
	312	0.3317			118.601	466.302
	313	0.3266			119.919	553.712
	314	0.3219			121.238	611.623
	315	0.3169			122.557	446.531
	316	0.3112			123.874	449.942
	317	0.3047			125.192	372.939
	318	0.2974			126.51	194.128
	319	0.2893			127.826	303.464
	320	0.2806			129.144	370.444
	321	0.2689			130.46	490.442
	322	0.2597			131.776	278.888
	323	0.2504			133.093	196.384
	324	0.2416			134.409	338.54
	325	0.2334			135.725	602.535
	326	0.2254			137.04	470.26
	327	0.2179			138.355	288.569
	328	0.2103			139.67	523.44
	329	0.2006			140.985	514.522
	330	0.1932			142.299	932.033
	331	0.1858			143.613	931.548
	332	0.179			144.928	1229.94
	333	0.1726			146.241	1667.78
	334	0.1669			147.555	2035.4
	335	0.1616			148.868	1974.27
	336	0.1558			150.181	2870.97
	337	0.1515			151.493	3235.23
	338	0.1475			152.806	3701.02
	339	0.1441			154.118	3582.29
	340	0.1408			155.43	3187.66
	341	0.1379			156.741	2898.62
	342	0.1355			158.053	2298.55
	343	0.1329			159.364	1826.74
	344	0.1312			160.675	1269.33
	345	0.1297			161.985	1008.2
	346	0.1282			163.296	697.304
	347	0.1271			164.605	588.248
	348	0.126			165.916	679.511
	349	0.125			167.226	430.948
	350	0.1239			168.535	228.379
	351	0.1228			169.844	318.07
	352	0.1216			171.152	213.745
	353	0.1202			172.462	157.943
	354	0.1188			173.77	141.34
	355	0.1172			175.078	242.221
	356	0.1148			176.386	258.864
	357	0.1129			177.693	261.976
	358	0.1108			179.001	292.412
	359	0.1085			180.308	648.688
	360	0.106			181.614	591.32
	361	0.1039			182.921	594.293
	362	0.1015			184.228	950.739
	363	0.099			185.534	597.481
	364	0.0959			186.84	978.511
	365	0.0934			188.146	991.247
	366	0.0907			189.45	1029.72
	367	0.0878			190.756	976.024
	368	0.0852			192.061	912.118
	369	0.0827			193.365	779.85
	370	0.08			194.67	766.085
	371	0.0779			195.974	664.808
	372	0.0756			197.277	569.395
	373	0.0737			198.581	614.446
	374	0.0719			199.885	239.974
	375	0.0695			201.188	659.111
	376	0.0681			202.49	736.993
	377	0.0666			203.793	593.135
	378	0.0652			205.096	176.62
	379	0.064			206.397	289.339
	380	0.0626			207.699	459.392
	381	0.0616			209.001	403.946
	382	0.0605			210.302	417.544
	383	0.0592			211.604	329.818
	384	0.0586			212.904	163.456
	385	0.0577			214.205	352.134
	386	0.0571			215.505	340.777
	387	0.0566			216.805	321
	388	0.056			218.104	653.534
	389	0.0559			219.404	287.232
	390	0.0555			220.704	645.641
	391	0.0552			222.003	562.821
	392	0.0552			223.302	474.695
	393	0.0549			224.601	725.428
	394	0.0548			225.898	683.888
	395	0.0549			227.197	838.984
	396	0.0547			228.495	788.584
	397	0.0548			229.792	752.602
	398	0.055			231.09	635.087
	399	0.0551			232.387	686.164
	400	0.0553			233.684	776.05
	401	0.0553			234.98	900.959
	402	0.0557			236.276	770.94
	403	0.0555			237.572	798.174
	404	0.0556			238.868	594.753
	405	0.0559			240.164	704.878
	406	0.0564			241.459	738.673
	407	0.0563			242.755	1357.51
	408	0.0566			244.05	1547.65
	409	0.057			245.344	1634.92
	410	0.0573			246.639	1853.07
	411	0.0577			247.933	2337.86
	412	0.058			249.227	2470.75
	413	0.0584			250.52	3049.49
	414	0.0587			251.813	3362.97
	415	0.0591			253.106	3761.98
	416	0.0596			254.399	4410.77
	417	0.0598			255.692	4354.13
	418	0.0602			256.984	4462.11
	419	0.0605			258.276	4200.27
	420	0.0607			259.568	4352.34
	421	0.061			260.86	4066.37
	422	0.0609			262.151	3504.57
	423	0.0614			263.442	3375.56
	424	0.0618			264.733	2853.4
	425	0.0617			266.024	2563.71
	426	0.062			267.314	2347.68
	427	0.0621			268.604	1984.01
	428	0.0623			269.895	1714.77
	429	0.0624			271.185	1396.14
	430	0.0626			272.474	1469.02
	431	0.0628			273.763	968.167
	432	0.0633			275.052	1019.79
	433	0.0633			276.341	593.951
	434	0.0633			277.629	775.653
	435	0.0638			278.917	521.352
	436	0.0636			280.205	435.221
	437	0.064			281.492	225.427
	438	0.0641			282.78	420.777
	439	0.0641			284.067	553.111
	440	0.0643			285.354	320.862
	441	0.0645			286.641	801.074
	442	0.0646			287.928	410.119
	443	0.0647			289.214	147.357
	444	0.0651			290.499	584.057
	445	0.0652			291.785	688.097
	446	0.0656			293.07	299.808
	447	0.0658			294.355	465.241
	448	0.0662			295.641	599.785
	449	0.0663			296.926	458.413
	450	0.0668			298.21	603.373
	451	0.0673			299.494	882.859
	452	0.0678			300.778	582.327
	453	0.0684			302.062	1028.41
	454	0.0691			303.346	1255.64
	455	0.0706			304.629	1680.44
	456	0.0714			305.912	1348.08
	457	0.0726			307.194	1880.98
	458	0.0735			308.478	2094.22
	459	0.075			309.76	2448.2
	460	0.0761			311.041	2958.27
	461	0.0774			312.323	2880.14
	462	0.0786			313.604	3039.95
	463	0.081			314.886	2929.35
	464	0.0829			316.167	2563.43
	465	0.0849			317.448	2378.46
	466	0.087			318.729	1919.05
	467	0.0893			320.009	1192.73
	468	0.0918			321.289	1158.36
	469	0.0942			322.568	731.344
	470	0.0965			323.849	558.077
	471	0.0984			325.128	360.199
	472	0.1009			326.406	305.632
	473	0.104			327.686	308.651
	474	0.1062			328.964	254.769
	475	0.1086			330.242	306.277
	476	0.1115			331.521	468.996
	477	0.114			332.799	668.512
	478	0.1164			334.076	507.497
	479	0.119			335.354	681.166
	480	0.1231			336.631	570.559
	481	0.1257			337.907	574.927
	482	0.1283			339.185	621.708
	483	0.1314			340.461	871.472
	484	0.1342			341.736	1016.42
	485	0.138			343.013	1133.03
	486	0.1416			344.288	1624.87
	487	0.1455			345.563	2103.72
	488	0.1517			346.839	2558.08
	489	0.1573			348.114	2463.44
	490	0.163			349.389	2677.13
	491	0.1694			350.663	2343.37
	492	0.178			351.938	1931.08
	493	0.186			353.211	1871.17
	494	0.1943			354.485	1508.6
	495	0.2038			355.759	1030.94
	496	0.2146			357.032	1235.48
	497	0.2288			358.305	1043.23
	498	0.2406			359.577	1046.47
	499	0.2524			360.85	1218.44
	500	0.2639			362.122	976.084
	501	0.2794			363.395	812.209
	502	0.2923			364.666	1016.58
	503	0.3054			365.938	1222.81
	504	0.3204			367.209	1302.27
	505	0.3319			368.48	1466.07
	506	0.3423			369.751	1347.42
	507	0.3521			371.021	1531.98
	508	0.3624			372.292	1539.63
	509	0.3689			373.562	1500.89
	510	0.3747			374.832	1980.77
	511	0.3788			376.102	1856.93
	512	0.3824			377.371	1784.63
	513	0.3842			378.64	1479.27
	514	0.3853			379.909	1373.45
	515	0.3857			381.178	1045.96
	516	0.3856			382.446	1062.34
	517	0.3853			383.714	1309.21
	518	0.3856			384.982	1128.42
	519	0.3865			386.25	1058.74
	520	0.3881			387.518	1431.39
	521	0.3912			388.784	1233.59
	522	0.3975			390.051	1345.31
	523	0.4047			391.318	1764.77
	524	0.4146			392.584	1956.39
	525	0.4261			393.851	2174.48
	526	0.4419			395.116	2260.93
	527	0.4552			396.383	2105.77
	528	0.4698			397.647	1716.51
	529	0.4908			398.913	1835.63
	530	0.5102			400.179	1373.4
	531	0.5328			401.443	1105.14
	532	0.558			402.708	953.741
	533	0.5945			403.972	730.081
	534	0.6254			405.236	706.34
	535	0.6586			406.5	654.727
	536	0.7026			407.764	322.208
	537	0.7422			409.026	347.999
	538	0.7848			410.29	247.344
	539	0.8283			411.553	236.566
	540	0.8788			412.815	170.744
	541	0.9154			414.078	117.519
	542	0.9492			415.34	214.263
	543	0.9886			416.602	244.56
	544	1.0174			417.863	80.8047
	545	1.0453			419.125	301.453
	546	1.0755			420.386	173.436
	547	1.0928			421.647	223.085
	548	1.1022			422.907	191.2
	549	1.1026			424.168	41.0465
	550	1.0929			425.429	183.197
	551	1.0749			426.688	379.672
	552	1.0489			427.948	386.505
	553	1.0062			429.208	548.582
	554	0.9652			430.467	437.786
	555	0.9181			431.726	684.027
	556	0.8528			432.984	816.494
	557	0.7961			434.243	600.585
	558	0.7386			435.502	579.245
	559	0.6671			436.76	461.703
	560	0.611			438.018	379.935
	561	0.5564			439.275	634.843
	562	0.4911			440.532	231.003
	563	0.4431			441.79	272.759
	564	0.3985			443.047	329.382
	565	0.3493			444.303	406.805
	566	0.3129			445.56	252.636
	567	0.2808			446.815	395.253
	568	0.2507			448.071	601.751
	569	0.2173			449.327	561.296
	570	0.1938			450.583	322.389
	571	0.1682			451.838	582.788
	572	0.1509			453.093	411.184
	573	0.1356			454.348	591.041
	574	0.1197			455.603	604.962
	575	0.1087			456.856	555.824
	576	0.0988			458.11	665.343
	577	0.0882			459.364	468.275
	578	0.0812			460.618	519.164
	579	0.0748			461.871	594.075
	580	0.0684			463.124	352.086
	581	0.0637			464.377	803.882
	582	0.0601			465.63	650.198
	583	0.0563			466.882	740.166
	584	0.0531			468.134	411.143
	585	0.051			469.386	487.376
	586	0.0483			470.638	430.82
	587	0.047			471.889	403.116
	588	0.0458			473.141	318.381
	589	0.0443			474.392	367.592
	590	0.0434			475.642	509.727
	591	0.0428			476.893	432.499
	592	0.042			478.143	227.354
	593	0.0415			479.393	360.739
	594	0.0411			480.643	387.494
	595	0.0408			481.892	248.831
	596	0.0402			483.142	329.543
	597	0.0402			484.391	182.334
	598	0.04			485.639	297.644
	599	0.0397			486.888	253.519
	600	0.0396			488.136	593.374
	601	0.0397			489.384	253.787
	602	0.0393			490.632	368.747
	603	0.0394			491.88	324.353
	604	0.0391			493.127	715.318
	605	0.0389			494.374	485.274
	606	0.0389			495.621	545.975
	607	0.0389			496.867	480.67
	608	0.0385			498.114	512.565
	609	0.0388			499.36	469.419
	610	0.0388			500.606	556.919
	611	0.0386			501.852	367.697
	612	0.0384			503.098	411.12
	613	0.0385			504.343	608.966
	614	0.0385			505.588	251.802
	615	0.0383			506.833	386.297
	616	0.0383			508.077	149.979
	617	0.038			509.321	333.088
	618	0.038			510.565	576.938
	619	0.0382			511.81	569.655
	620	0.0378			513.053	603.54
	621	0.0383			514.296	260.607
	622	0.038			515.539	726.43
	623	0.0377			516.782	687.936
	624	0.0376			518.025	510.172
	625	0.038			519.268	393.461
	626	0.0379			520.51	530.426
	627	0.0377			521.752	557.716
	628	0.0378			522.993	551.9
	629	0.0376			524.235	507.066
	630	0.0372			525.477	303.234
	631	0.0374			526.717	445.686
	632	0.0373			527.958	706.47
	633	0.0376			529.198	703.981
	634	0.0373			530.438	851.266
	635	0.0373			531.679	674.119
	636	0.0375			532.919	914.405
	637	0.037			534.158	692.33
	638	0.0372			535.397	600.321
	639	0.0369			536.637	516.337
	640	0.0373			537.876	438.4
	641	0.037			539.114	453.183
	642	0.037			540.354	554.836
	643	0.0374			541.592	323.565
	644	0.0372			542.829	297.34
	645	0.0374			544.067	125.328
	646	0.0374			545.305	247.179
	647	0.037			546.542	262.66
	648	0.0376			547.779	67.1402
	649	0.0372			549.016	112.335
	650	0.0377			550.252	76.6923
	651	0.0371			551.489	122.029
	652	0.0371			552.725	-18.1817
	653	0.0366			553.961	208.881
	654	0.0368			555.196	-43.8957
	655	0.0366			556.432	201.041
	656	0.0361			557.667	212.927
	657	0.0374			558.902	248.516
	658	0.037			560.137	519.29
	659	0.0365			561.371	333.47
	660	0.0365			562.605	181.154
	661	0.0363			563.84	752.565
	662	0.0362			565.073	995.791
	663	0.0365			566.307	1787.09
	664	0.0366			567.54	2279.85
	665	0.0366			568.773	3057.76
	666	0.0368			570.006	3451.9
	667	0.0367			571.238	3713.49
	668	0.0367			572.471	3832.56
	669	0.0369			573.703	3288.13
	670	0.0365			574.936	2917.8
	671	0.0367			576.167	2051.92
	672	0.0362			577.398	1655.36
	673	0.0363			578.63	1377.55
	674	0.0367			579.86	1067.86
	675	0.0368			581.092	1150.64
	676	0.0364			582.322	870.465
	677	0.0353			583.553	969.023
	678	0.0362			584.782	912.82
	679	0.0357			586.012	882.357
	680	0.0357			587.242	845.902
	681	0.036			588.471	727.988
	682	0.036			589.7	846.278
	683	0.0364			590.93	831.522
	684	0.036			592.158	1100.75
	685	0.0365			593.387	666.778
	686	0.0365			594.614	822.734
	687	0.0357			595.843	980.711
	688	0.0358			597.07	828.615
	689	0.0362			598.298	1318.58
	690	0.0357			599.525	1251.93
	691	0.0362			600.752	1537.23
	692	0.0359			601.979	1691.32
	693	0.0361			603.206	2110.05
	694	0.0356			604.432	2443.31
	695	0.0362			605.658	3138.92
	696	0.0365			606.884	3788.96
	697	0.036			608.109	4821.5
	698	0.0364			609.335	6222.82
	699	0.036			610.561	7913.45
	700	0.0364			611.785	9889.56
	701	0.0363			613.01	11613.3
	702	0.0359			614.234	12536.5
	703	0.0357			615.459	11992.9
	704	0.0363			616.684	10679.5
	705	0.0367			617.907	8765.29
	706	0.0369			619.131	7215.34
	707	0.0369			620.354	5762.51
	708	0.0366			621.577	4600.41
	709	0.0369			622.8	4034.51
	710	0.0364			624.022	3260.79
	711	0.0366			625.245	2945.89
	712	0.037			626.468	2610.88
	713	0.0373			627.689	2357.58
	714	0.0368			628.911	2489.66
	715	0.0373			630.133	2693.68
	716	0.0373			631.354	2985.67
	717	0.0371			632.575	3105.84
	718	0.0374			633.796	2654.31
	719	0.0373			635.017	2700.41
	720	0.0371			636.237	2392.55
	721	0.0373			637.457	2346.54
	722	0.0381			638.677	2130.44
	723	0.0376			639.896	1642.1
	724	0.0378			641.116	1719.9
	725	0.0381			642.336	1237.24
	726	0.0377			643.555	1132.73
	727	0.038			644.773	1238.4
	728	0.0388			645.992	1017.62
	729	0.0384			647.21	836.786
	730	0.0386			648.429	1030.51
	731	0.0389			649.646	707.259
	732	0.0393			650.864	971.099
	733	0.0395			652.081	990.433
	734	0.0397			653.299	899.474
	735	0.0393			654.516	948.812
	736	0.0396			655.732	683.234
	737	0.0396			656.948	744.512
	738	0.0395			658.165	863.976
	739	0.0402			659.381	957.351
	740	0.0405			660.597	984.489
	741	0.0401			661.812	989.521
	742	0.0402			663.027	1137.08
	743	0.0407			664.243	1109.94
	744	0.0397			665.458	1219.34
	745	0.0399			666.673	1145.92
	746	0.0397			667.887	1146.78
	747	0.0405			669.102	1298.36
	748	0.0402			670.315	1015.73
	749	0.0403			671.529	1295.95
	750	0.04			672.742	1288.65
	751	0.0401			673.956	1214.95
	752	0.0403			675.169	1227.68
	753	0.0398			676.382	1067.34
	754	0.0401			677.595	1067.91
	755	0.0402			678.807	1398.56
	756	0.0398			680.019	1248.12
	757	0.0402			681.23	1572.82
	758	0.0408			682.442	1438.4
	759	0.0403			683.654	1765.2
	760	0.0405			684.865	2045.74
	761	0.0403			686.076	2161.11
	762	0.0406			687.287	2564.71
	763	0.04			688.498	3204.3
	764	0.0406			689.708	3454.94
	765	0.0399			690.918	4435.67
	766	0.0401			692.128	4928.62
	767	0.0402			693.338	4937.52
	768	0.0401			694.547	4823.31
	769	0.0399			695.757	4367.95
	770	0.0401			696.966	3595.46
	771	0.0396			698.174	2717.65
	772	0.039			699.383	2249.42
	773	0.0388			700.591	1877.92
	774	0.0401			701.799	1720.37
	775	0.04			703.007	1253.6
	776	0.0392			704.215	1459.56
	777	0.0398			705.422	1352.27
	778	0.0394			706.629	1210.54
	779	0.0394			707.836	1564.11
	780	0.0391			709.043	1786.33
	781	0.0388			710.25	2152.21
	782	0.039			711.456	2265.3
	783	0.0397			712.662	2390.54
	784	0.039			713.868	2811.28
	785	0.0392			715.073	2509.48
	786	0.0391			716.278	2100.23
	787	0.0389			717.483	2037.07
	788	0.0383			718.688	1435.1
	789	0.039			719.894	942.264
	790	0.0387			721.098	982.079
	791	0.0375			722.303	1076.6
	792	0.0392			723.506	1039.36
	793	0.0383			724.71	627.039
	794	0.0383			725.914	613.979
	795	0.0381			727.117	663.743
	796	0.0367			728.32	703.35
	797	0.0385			729.523	990.456
	798	0.0386			730.726	904.259
	799	0.0385			731.928	858.591
	800	0.0388			733.131	1052.41
					734.332	945.773
					735.534	751.75
					736.735	681.51
					737.938	653.879
					739.139	396.603
					740.339	470.442
					741.54	465.013
					742.74	518.499
					743.94	549.608
					745.141	570.528
					746.34	361.562
					747.54	565.494
					748.739	785.745
					749.938	959.235
					751.137	731.731
					752.336	609.991
					753.534	799.737
					754.732	979.338
					755.931	1236.38
					757.128	1098.21
					758.325	1534.64
					759.522	1687.88
					760.72	2047.06
					761.917	2281.95
					763.113	2196.7
					764.31	2062.44
					765.506	1787.31
					766.702	1228.42
					767.897	1393.82
					769.093	1073.41
					770.288	971.312
					771.483	924.284
					772.679	956.864
					773.873	535.903
					775.067	625.565
					776.262	649.835
					777.455	618.887
					778.649	686.036
					779.843	730.679
					781.036	683.276
					782.229	731.965
					783.422	578.088
					784.614	610.339
					785.807	419.481
					786.999	478.263
					788.191	393.718
					789.383	515.933
					790.574	564.428
					791.766	285.136
					792.957	128.65
					794.147	445.49
					795.338	239.786
					796.528	599.894
					797.719	398.384
					798.908	461.473
					800.099	278.592
					801.288	335.858
					802.478	352.32
					803.666	582.475
					804.855	654.933
					806.044	649.699
					807.232	361.411
					808.42	410.224
					809.608	457.413
					810.796	513.263
					811.983	335.318
					813.171	406.516
					814.357	426.862
					815.545	447.785
					816.731	516.597
					817.918	540.803
					819.104	185.043
					820.29	360.749
					821.476	535.166
					822.661	82.5228
					823.847	316.002
					825.031	286.555
					826.217	651.029
					827.401	634.951
					828.586	435.85
					829.77	661.474
					830.954	528.757
					832.138	422.907
					833.321	535.645
					834.505	308.113
					835.688	517.686
					836.87	374.368
					838.053	544.402
					839.235	249.799
					840.418	258.133
					841.6	228.814
					842.781	240.234
					843.963	467.899
					845.145	155.767
					846.325	237.372
					847.507	119.773
					848.688	224.421
					849.868	189.591
					851.048	410.057
					852.228	153.783
					853.408	446.455
					854.587	264.306
					855.767	362.444
					856.946	459.609
					858.125	425.447
					859.304	477.347
					860.482	605.071
					861.66	632.667
					862.839	487.646
					864.017	822.639
					865.194	835.979
					866.371	361.732
					867.549	790.754
					868.726	761.319
					869.902	480.624
					871.079	280.476
					872.255	457.66
					873.432	491.612
					874.607	305.527
					875.782	511.706
					876.958	157.459
					878.134	403.345
					879.309	520.7
					880.483	345.314
					881.658	423.442
					882.832	422.693
					884.006	413.663
					885.18	442.055
					886.354	613.901
					887.527	411.417
					888.7	499.98
					889.874	193.177
					891.047	248.182
					892.219	325.926
					893.392	453.455
					894.563	178.977
					895.735	247.726
					896.907	324.541
					898.079	201.083
					899.25	421.022
					900.421	276.073
					901.592	141.307
					902.763	310.769
					903.934	169.634
					905.104	176.63
					906.273	238.074
					907.443	170.508
					908.613	234.784
					909.782	259.944
					910.951	152.13
					912.12	157.723
					913.289	389.648
					914.457	380.291
					915.626	248.69
					916.794	412.733
					917.962	467.283
					919.129	504.335
					920.297	314.941
					921.464	432.23
					922.631	509.329
					923.798	234.658
					924.964	403.077
					926.131	353.731
					927.297	280.961
					928.463	312.193
					929.628	237.847
					930.794	350.793
					931.959	208.927
					933.124	316.699
					934.289	278.009
					935.453	249.656
					936.618	348.799
					937.782	399.119
					938.946	452.769
					940.109	442.366
					941.273	355.065
					942.437	375.146
					943.6	387.023
					944.763	161.682
					945.925	93.3415
					947.088	276.396
					948.25	331.096
					949.412	419.384
					950.573	524.77
					951.735	357.627
					952.896	443.433
					954.058	276.108
					955.219	684.034
					956.38	662.83
					957.54	654.158
					958.7	626.767
					959.86	709.261
					961.021	390.707
					962.18	536.102
					963.34	434.556
					964.499	553.476
					965.657	433.896
					966.816	138.784
					967.975	308.288
					969.134	447.497
					970.292	259.179
					971.449	200.404
					972.607	119.402
					973.765	224.777
					974.922	130.659
					976.079	300.854
					977.236	119.447
					978.393	77.7483
					979.549	260.17
					980.705	280.497
					981.861	163.886
					983.018	178.327
					984.173	268.887
					985.328	600.285
					986.483	390.902
					987.639	333.417
					988.793	406.681
					989.948	242.909
					991.103	380.988
					992.256	233.233
					993.41	573.592
					994.563	410.22
					995.717	398.74
					996.87	530.776
					998.023	833.934
					999.177	580.097
					1000.33	704.802
					1001.48	748.74
					1002.63	900.382
					1003.79	1070.81
					1004.94	1351.18
					1006.09	1807.22
					1007.24	2443.3
					1008.39	3142.93
					1009.54	3882.8
					1010.69	4626.92
					1011.84	5455.89
					1012.99	5860.58
					1014.14	5796.2
					1015.29	5536.3
					1016.44	4770.84
					1017.59	3548.39
					1018.74	3217.16
					1019.89	2462.92
					1021.04	1548.88
					1022.19	1307.83
					1023.34	828.498
					1024.49	761.152
					1025.63	517.151
					1026.78	574.833
					1027.93	587.712
					1029.08	379.231
					1030.22	313.066
					1031.37	333.987
					1032.52	382.452
					1033.66	290.325
					1034.81	355.602
					1035.96	367.559
					1037.1	134.501
					1038.25	308.133
					1039.39	217.556
					1040.54	427.338
					1041.68	257.752
					1042.83	282.033
					1043.97	276.424
					1045.12	646.1
					1046.26	715.134
					1047.4	607.096
					1048.55	516.07
					1049.69	346.038
					1050.83	321.086
					1051.98	323.884
					1053.12	215.656
					1054.26	308.163
					1055.41	219.166
					1056.55	202.81
					1057.69	267.689
					1058.83	441.642
					1059.97	333.548
					1061.12	270.378
					1062.26	111.027
					1063.4	225.467
					1064.54	94.0247
					1065.68	260.038
					1066.82	267.854
					1067.96	16.7965
					1069.1	320.225
					1070.24	285.571
					1071.38	315.261
					1072.52	407.181
					1073.66	295.702
					1074.8	282.842
					1075.94	261.494
					1077.07	383.826
					1078.21	83.9248
					1079.35	377.959
					1080.49	260.379
					1081.63	331.581
					1082.76	224.777
					1083.9	381.937
					1085.04	210.813
					1086.17	286.547
					1087.31	302.237
					1088.45	191.279
					1089.58	381.022
					1090.72	182.048
					1091.86	352.609
					1092.99	351.351
					1094.13	371.622
					1095.26	278.005
					1096.4	349.956
					1097.53	234.867
					1098.67	330.574
					1099.8	370.409
					1100.93	356.499
					1102.07	245.773
					1103.2	399.801
					1104.33	381.683
					1105.47	234.384
					1106.6	177.516
					1107.73	377.004
					1108.87	53.0294
					1110	198.75
					1111.13	260.484
					1112.26	95.9095
					1113.4	388.407
					1114.53	430.873
					1115.66	337.489
					1116.79	392.943
					1117.92	366.443
					1119.05	316.212
					1120.18	233.603
					1121.31	392.777
					1122.44	230.29
					1123.57	244.85
					1124.7	456.002
					1125.83	356.123
					1126.96	377.238
					1128.09	579.918
					1129.22	322.24
					1130.35	440.687
					1131.48	595.944
					1132.61	578.245
					1133.73	737.933
					1134.86	988.566
					1135.99	769.695
					1137.12	1226.06
					1138.24	1466.13
					1139.37	2005.09
					1140.5	2325.53
					1141.62	2487.97
					1142.75	2379.66
					1143.88	2418.67
					1145	1807.53
					1146.13	1571.17
					1147.25	1152.61
					1148.38	989.784
					1149.51	1035.11
					1150.63	952.476
					1151.75	1082.43
					1152.88	1255.84
					1154	912.759
					1155.13	1110.09
					1156.25	1268.42
					1157.38	1411.59
					1158.5	1402.79
					1159.62	1952.29
					1160.75	1858.84
					1161.87	2406.46
					1162.99	2560.86
					1164.12	2767.49
					1165.24	2902.43
					1166.36	2896.07
					1167.48	2802.69
					1168.6	2678.82
					1169.72	2526.62
					1170.85	2343.89
					1171.97	2039.19
					1173.09	2074.02
					1174.21	1664.64
					1175.33	1505.56
					1176.45	1568.62
					1177.57	1341.92
					1178.69	1352.67
					1179.81	1193.41
					1180.93	1199.76
					1182.05	1140.7
					1183.17	1031.45
					1184.29	996.322
					1185.4	956.804
					1186.52	1155.11
					1187.64	1095.95
					1188.76	833.777
					1189.88	831.286
					1191	898.67
					1192.11	942.04
					1193.23	607.529
					1194.35	843.105
					1195.46	792.507
					1196.58	868.637
					1197.7	745.866
					1198.81	878.843
					1199.93	869.723
					1201.04	838.718
					1202.16	882.062
					1203.28	890.405
					1204.39	881.235
					1205.51	766.991
					1206.62	696.471
					1207.74	912.749
					1208.85	850.968
					1209.96	1012.57
					1211.08	760.162
					1212.19	831.934
					1213.3	1094.38
					1214.42	936.072
					1215.53	966.216
					1216.64	952.51
					1217.76	910.273
					1218.87	791.228
					1219.98	1187.7
					1221.09	1108.13
					1222.21	1276.51
					1223.32	1295.68
					1224.43	930.611
					1225.54	1257.11
					1226.65	1188.38
					1227.76	1310.72
					1228.87	1323.22
					1229.98	1463.17
					1231.09	1594.36
					1232.21	1760.75
					1233.31	1639.14
					1234.42	1939.71
					1235.53	2071
					1236.64	2294.72
					1237.75	2536.1
					1238.86	2498.05
					1239.97	2596.44
					1241.08	2919.39
					1242.19	3130.15
					1243.29	2854.24
					1244.4	3082.64
					1245.51	3007.06
					1246.62	2719.89
					1247.73	2478.88
					1248.83	2804.27
					1249.94	2600.61
					1251.05	2610.76
					1252.15	2424.6
					1253.26	2394.96
					1254.37	2563.85
					1255.47	2364.26
					1256.58	2683.24
					1257.68	3083.99
					1258.79	3109.52
					1259.89	3455.23
					1261	4097.02
					1262.1	4789.82
					1263.21	5323.75
					1264.31	6653.44
					1265.42	7371.31
					1266.52	8761.49
					1267.62	9827.1
					1268.73	10740.5
					1269.83	11616.5
					1270.93	11599.1
					1272.04	11552.9
					1273.14	10349.1
					1274.24	9273.23
					1275.34	8132.74
					1276.45	6836.8
					1277.55	6005.46
					1278.65	5379.8
					1279.75	5035.26
					1280.85	4604.14
					1281.95	4791.21
					1283.05	4539.37
					1284.15	4376.11
					1285.25	4450.03
					1286.36	4936.5
					1287.46	5170.2
					1288.55	6007.47
					1289.66	7184.55
					1290.75	8419.73
					1291.85	9899.53
					1292.95	12063.7
					1294.05	13751.2
					1295.15	15274.8
					1296.25	15490.5
					1297.35	15181.8
					1298.45	14041.7
					1299.54	12305.5
					1300.64	10606.4
					1301.74	8697.61
					1302.84	7722.21
					1303.93	6428.31
					1305.03	5627.82
					1306.13	4640.08
					1307.22	4032.53
					1308.32	3834.31
					1309.42	3362.13
					1310.51	3067.88
					1311.61	2708.9
					1312.7	2548.01
					1313.8	2629.88
					1314.89	2464.38
					1315.99	2305.46
					1317.08	2032.75
					1318.18	2196.92
					1319.27	2265.21
					1320.37	2152.81
					1321.46	1957.79
					1322.55	2148.67
					1323.65	2096.31
					1324.74	2108.63
					1325.83	2221.37
					1326.93	2499.34
					1328.02	2500.44
					1329.11	2954.94
					1330.2	2906.87
					1331.3	3374.93
					1332.39	3720.19
					1333.48	4427.65
					1334.57	4350.57
					1335.66	4523.87
					1336.75	4726.25
					1337.84	4680.36
					1338.94	5021.48
					1340.03	4955.39
					1341.12	4889.23
					1342.21	5006.56
					1343.3	4933.57
					1344.39	4766.45
					1345.48	4505.15
					1346.56	4084.64
					1347.65	4103.1
					1348.74	3785.36
					1349.83	3617.64
					1350.92	3230.1
					1352.01	3046.41
					1353.1	2900.73
					1354.18	2757.2
					1355.27	2449.78
					1356.36	2319.47
					1357.45	2126.22
					1358.54	2107.94
					1359.62	1782.01
					1360.71	1743.34
					1361.79	1850.59
					1362.88	1730.94
					1363.97	1750.5
					1365.05	1446.42
					1366.14	1434.36
					1367.23	1473.94
					1368.31	1129.02
					1369.4	1011.04
					1370.48	1054.9
					1371.57	817.528
					1372.65	775.76
					1373.74	1001.72
					1374.82	901.338
					1375.9	701.811
					1376.99	801.621
					1378.07	869.881
					1379.15	848.012
					1380.24	848.609
					1381.32	544.961
					1382.4	538.625
					1383.49	690.009
					1384.57	845.904
					1385.65	420.041
					1386.73	332.255
					1387.82	575.963
					1388.9	289.525
					1389.98	316.579
					1391.06	223.974
					1392.14	284.783
					1393.22	81.4138
					1394.3	304.709
					1395.38	399.304
					1396.46	428.381
					1397.54	141.121
					1398.62	115.851
					1399.7	395.653
					1400.78	189.505
					1401.86	204.823
					1402.94	373.89
					1404.02	260.268
					1405.1	228.017
					1406.18	329.223
					1407.26	253.93
					1408.33	223.858
					1409.41	257.143
					1410.49	-40.154
					1411.57	387.114
					1412.65	239.201
					1413.72	267.93
					1414.8	321.586
					1415.88	243.811
					1416.95	558.139
					1418.03	199.254
					1419.11	497.813
					1420.18	438.152
					1421.26	523.645
					1422.33	395.915
					1423.41	588.094
					1424.48	546.59
					1425.56	629.93
					1426.63	701.961
					1427.71	724.076
					1428.78	446.421
					1429.86	693.424
					1430.93	772.407
					1432.01	458.312
					1433.08	766.88
					1434.15	557.284
					1435.23	756.889
					1436.3	1143.06
					1437.37	897.097
					1438.45	771.635
					1439.52	1128.51
					1440.59	1296.66
					1441.66	930.003
					1442.74	909.274
					1443.81	1239.21
					1444.88	1412.15
					1445.95	1466.74
					1447.02	1612.5
					1448.09	1610.23
					1449.16	1872.35
					1450.23	2118.64
					1451.3	2424.31
					1452.37	2499.83
					1453.44	2707.68
					1454.51	3159.7
					1455.58	3253.73
					1456.65	3817.88
					1457.72	4259.02
					1458.79	4709.48
					1459.86	5041.42
					1460.93	5364.37
					1462	5057.12
					1463.07	5423.65
					1464.13	5717.24
					1465.2	5151.76
					1466.27	5178.07
					1467.34	4685.5
					1468.41	4714.08
					1469.47	4639.81
					1470.54	4650.17
					1471.61	4871.02
					1472.67	5206.39
					1473.74	5601.41
					1474.81	6154.55
					1475.87	6897.93
					1476.94	7570.62
					1478	9189.4
					1479.07	10211
					1480.13	12110.4
					1481.2	13992.2
					1482.26	16197.8
					1483.33	19050.7
					1484.39	21535.5
					1485.46	24028.1
					1486.52	26808.3
					1487.59	27428.8
					1488.65	27776.6
					1489.71	26768.5
					1490.78	24947.6
					1491.84	22676.1
					1492.9	19901.1
					1493.96	17455.9
					1495.03	14855.9
					1496.09	12902.7
					1497.15	11029.4
					1498.21	9063.48
					1499.28	7832.36
					1500.34	6814.64
					1501.4	6295.51
					1502.46	5500.29
					1503.52	4679.52
					1504.58	4392.21
					1505.64	4086.42
					1506.7	3868.02
					1507.76	3306.65
					1508.82	2752.03
					1509.88	3069.88
					1510.94	2945.75
					1512	2423.15
					1513.06	2471.73
					1514.12	2451.26
					1515.18	2391.65
					1516.24	2046.26
					1517.3	1965.91
					1518.36	1996.25
					1519.42	1994.38
					1520.47	2094.04
					1521.53	2103.82
					1522.59	2337.47
					1523.65	2268.94
					1524.7	2163.5
					1525.76	2589.06
					1526.82	2384.46
					1527.87	2517.02
					1528.93	2501.85
					1529.99	2422.05
					1531.04	2441.62
					1532.1	2315.66
					1533.16	2478.66
					1534.21	1987.48
					1535.27	1937.85
					1536.32	1774.93
					1537.38	1850.26
					1538.43	1958.08
					1539.49	2190.94
					1540.54	2044.38
					1541.59	2196.44
					1542.65	2170.34
					1543.7	2436.07
					1544.76	2646.36
					1545.81	3046.74
					1546.86	3060.4
					1547.92	3187.68
					1548.97	3433.26
					1550.02	3771.72
					1551.07	3744.03
					1552.13	3493.76
					1553.18	3654.01
					1554.23	3359.68
					1555.28	3183.64
					1556.33	3079.55
					1557.38	2622.67
					1558.44	2676.43
					1559.49	2321.61
					1560.54	2152.52
					1561.59	2062.4
					1562.64	1749.3
					1563.69	1522.11
					1564.74	1838.73
					1565.79	1548.86
					1566.84	1400.76
					1567.89	1127.11
					1568.94	1060.41
					1569.99	998.413
					1571.04	948.09
					1572.08	923.414
					1573.13	917.419
					1574.18	960.373
					1575.23	800.856
					1576.28	992.967
					1577.33	840.527
					1578.37	762.644
					1579.42	771.009
					1580.47	739.827
					1581.52	855.538
					1582.56	913.085
					1583.61	735.245
					1584.66	977.159
					1585.7	811.067
					1586.75	376.734
					1587.79	597.928
					1588.84	655.925
					1589.89	947.409
					1590.93	881.916
					1591.98	1108.32
					1593.02	1127.04
					1594.07	1243.95
					1595.11	1293.22
					1596.16	1653.34
					1597.2	1693.51
					1598.24	1864.66
					1599.29	2246.34
					1600.33	2616.55
					1601.38	3040.74
					1602.42	3818.37
					1603.46	3981.07
					1604.5	4962.86
					1605.55	6167.4
					1606.59	7044.75
					1607.63	8753.58
					1608.67	10697.2
					1609.72	13133.5
					1610.76	15566
					1611.8	18650.8
					1612.84	21558.6
					1613.88	24430.1
					1614.92	26311.1
					1615.97	27386.4
					1617.01	26283.8
					1618.05	24376.5
					1619.09	21295.7
					1620.13	17810.4
					1621.17	15004.4
					1622.21	12272.6
					1623.25	10037.5
					1624.29	8078.78
					1625.33	6652.48
					1626.37	5343.17
					1627.4	4284.81
					1628.44	3740.71
					1629.48	3436.19
					1630.52	2722.68
					1631.56	2516.76
					1632.6	2061.64
					1633.63	1843.93
					1634.67	1774.43
					1635.71	1490.91
					1636.75	1310.89
					1637.78	1149.73
					1638.82	1111
					1639.86	921.674
					1640.89	777.097
					1641.93	910.44
					1642.96	846.072
					1644	807.686
					1645.04	573.815
					1646.07	693.429
					1647.11	740.109
					1648.14	935.417
					1649.18	946.975
					1650.21	909.106
					1651.25	692.043
					1652.28	625.993
					1653.32	626.066
					1654.35	612.074
					1655.38	522.639
					1656.42	558.375
					1657.45	440.74
					1658.49	542.806
					1659.52	278.87
					1660.55	586.64
					1661.58	563.826
					1662.62	396.923
					1663.65	163.887
					1664.68	276.016
					1665.71	201.45
					1666.75	491.15
					1667.78	281.898
					1668.81	517.372
					1669.84	409.84
					1670.87	453.742
					1671.9	320.114
					1672.93	321.346
					1673.96	360.423
					1674.99	283.42
					1676.02	244.202
					1677.05	287.786
					1678.08	314.71
					1679.11	443.42
					1680.14	285.227
					1681.17	235.874
					1682.2	255.09
					1683.23	359.534
					1684.26	115.14
					1685.29	309.419
					1686.32	347.007
					1687.34	258.687
					1688.37	87.1329
					1689.4	243.05
					1690.43	306.316
					1691.46	238.907
					1692.48	368.562
					1693.51	331.877
					1694.54	406.839
					1695.56	253.609
					1696.59	316.649
					1697.62	179.967
					1698.64	292.94
					1699.67	558.184
					1700.7	240.727

## Sheet: Figure S4
Figure S4A	Wavenumber	Control	3.5 µM Aß	1.75 µM Aß	875 nM Aß	437 nM Aß		Figure S4B		Buffer	3.5 µM Aß	1.75 µM Aß	875 nM Aß	437 nM Aß	218 nM Aß
	302.348	3744.19	4245.6	2087.73	4159.84	2979.46			Avg 1	0.295802	0.11072	0.0573189	0.144879	0.215283	0.247018
	304.246	3749.88	4237.14	2079.59	4191.23	2967.92			Avg 2	0.238638	0.0556395	0.158138	0.205658	0.227805	0.211403
	306.146	3749.87	4246.23	2081.32	4218.72	2973.13			Avg 3	0.134101	0.152295	0.159662	0.0982307	0.30981	0.207849
	308.045	3757	4264.33	2091.22	4231.8	2989.15			Avg 4	0.225831			0.102406	0.11676
	309.943	3761.09	4298.2	2093.27	4226.88	3015.76			Avg 5	0.272878			0.174212	0.181652
	311.84	3766.79	4337.07	2101.88	4205.86	3036.19			Avg 6	0.225444
	313.738	3774.98	4358.2	2120.82	4185.9	3050.04			Avg 7	0.175056
	315.635	3806.9	4372.55	2153.36	4174	3058			Avg 8	0.219171
	317.531	3799.51	4360.5	2175.23	4175.48	3064.32			Avg 9	0.160184
	319.428	3824.76	4386.94	2164.48	4184.31	3053.73			Avg 10	0.174776
	321.322	3838.3	4418.98	2161.23	4199.05	3047.48
	323.217	3846.91	4428.33	2169.79	4226.64	3059.28
	325.111	3861.59	4447.85	2166.95	4272.49	3059.25
	327.006	3863.41	4459.71	2167.55	4316.93	3078.15
	328.9	3889.21	4498.3	2189.5	4369.08	3079.85
	330.795	3905.89	4529.64	2213.51	4392.91	3085.66
	332.688	3885.02	4547.42	2224.39	4430.7	3129.3
	334.58	3892.22	4591.51	2223.01	4428.05	3152.54
	336.473	3881.07	4627.79	2220.42	4410.12	3165.43
	338.363	3860.31	4626.08	2218.07	4413.76	3186.17
	340.256	3876.13	4630.27	2206.82	4396.67	3174.26
	342.146	3879.41	4657.61	2197.93	4389.97	3181.9
	344.037	3894.94	4691.9	2213.65	4386.78	3151.17
	345.926	3892.29	4712.05	2217.9	4393.61	3134.86
	347.816	3923.37	4743.4	2216.45	4403.34	3127.8
	349.705	3947.94	4769.41	2210.23	4398.85	3129.12
	351.594	3958.06	4790.74	2210.69	4413.44	3126.34
	353.482	3961.46	4779.69	2216.17	4443.64	3140.38
	355.371	3988.52	4799.94	2216.13	4454.86	3179.07
	357.258	3999.61	4850.85	2229.2	4473.23	3227.66
	359.146	3987.9	4878.88	2246.94	4477.07	3243.69
	361.033	3963.37	4904.54	2263.33	4516.56	3261.04
	362.918	3986.7	4960.4	2278.39	4533.95	3256.72
	364.805	3989.56	5012.54	2295.42	4549.78	3248.66
	366.689	4002.33	5038.28	2310.91	4594.35	3252.46
	368.576	4029.49	5055.72	2327.87	4638.23	3273.39
	370.461	4055.16	5123.53	2332.97	4673.52	3298.73
	372.344	4069.85	5160.69	2350.92	4675.13	3342.07
	374.229	4091.57	5209.81	2376.95	4685.13	3344.87
	376.111	4113.02	5248.17	2410.7	4694.11	3354.71
	377.994	4141.77	5322.4	2437.74	4695.55	3350.75
	379.877	4168.33	5379.87	2447.78	4703.38	3330.44
	381.76	4200.41	5401.41	2442.09	4725.99	3321.63
	383.641	4226.07	5426.03	2437.75	4745.4	3315.98
	385.521	4215.09	5446.55	2438.05	4757.72	3312.61
	387.402	4210.77	5452.87	2450.04	4760.78	3343.24
	389.283	4229.75	5465.24	2481.72	4778.53	3368.61
	391.164	4254.74	5475.52	2513.48	4795.31	3384.4
	393.043	4275.58	5507.44	2524.09	4804.9	3391.64
	394.922	4301.19	5543.19	2516.46	4831.29	3391
	396.801	4285.75	5588.63	2519.73	4825.36	3391.64
	398.68	4290.54	5623.74	2515.39	4821.04	3402.1
	400.559	4288.51	5664.17	2508.42	4828.7	3397.28
	402.436	4264.47	5697.26	2509.62	4844.45	3387.78
	404.312	4255.3	5696.32	2513.56	4864.2	3398.13
	406.189	4255.36	5710.37	2520.14	4889.79	3407.4
	408.066	4266.73	5729.47	2507.36	4895.11	3401.97
	409.941	4274.42	5746.69	2517.1	4886.99	3402.69
	411.816	4251.75	5764.27	2537.79	4879.69	3412.94
	413.691	4281.04	5789.02	2545.37	4883.65	3417.39
	415.566	4308.91	5850.23	2552.07	4905.15	3407.05
	417.441	4327.75	5880.91	2564.86	4924.94	3417.63
	419.314	4351.32	5926.09	2571	4943.91	3438.09
	421.189	4367.7	5959.65	2569.74	4973.55	3469.34
	423.061	4395.21	5996.44	2572.24	4979.31	3468.76
	424.934	4422.04	6030.23	2597.82	4979.95	3492.74
	426.807	4447.68	6048.47	2636.97	5012.71	3505.39
	428.678	4479.07	6084.31	2665	5042.55	3529.37
	430.549	4515.99	6137.38	2708.58	5084.51	3558.2
	432.42	4555.07	6143.2	2735.01	5112.75	3572.35
	434.291	4552.75	6195.49	2740.67	5158.91	3573.71
	436.16	4544.73	6230.01	2746.54	5188.39	3563.21
	438.031	4540.93	6292.93	2740.1	5182.62	3540.72
	439.9	4540.6	6352.83	2745.6	5184.1	3545.12
	441.77	4548.34	6395.22	2762.38	5183.93	3539.73
	443.637	4549.9	6441.17	2778.1	5186.61	3562.38
	445.506	4562.45	6455.17	2821.64	5208.41	3583.32
	447.373	4570.19	6444.44	2828.82	5232.57	3579.19
	449.24	4581.84	6496.52	2850.57	5282.61	3585.46
	451.107	4600.55	6541.92	2857.04	5293.03	3604.67
	452.973	4634.54	6612.83	2871.1	5335.69	3623.71
	454.84	4672.3	6656.27	2901.48	5355.18	3663.62
	456.705	4723.61	6717.08	2925.68	5370.65	3684.35
	458.57	4748.06	6785.14	2966.5	5382.54	3693.76
	460.436	4777.34	6833.67	3019.97	5394.72	3693.15
	462.299	4784.45	6891.13	3056.27	5407.9	3663.24
	464.164	4774.36	6970.64	3094.98	5425.11	3652.68
	466.027	4759.41	7034.01	3099.53	5421.27	3646.96
	467.891	4737.91	7074.91	3120.19	5451.92	3643.16
	469.752	4748.09	7076.29	3113.65	5452.84	3660.32
	471.615	4780.72	7100.66	3106.52	5480.11	3646.48
	473.477	4797.89	7154.82	3104.9	5525.14	3644.94
	475.338	4817.82	7200.06	3121.01	5549.28	3647.04
	477.199	4835.19	7272.75	3152.15	5578.24	3654.53
	479.061	4849.94	7396.53	3171.37	5610.02	3693.52
	480.92	4863.87	7543.68	3187.88	5606.94	3728.25
	482.779	4862.46	7707.77	3212.82	5632.1	3742.48
	484.639	4885.27	7884.05	3209.27	5648.86	3764.67
	486.498	4918.52	8003.56	3194.36	5679.92	3774.26
	488.357	4966.93	8084.28	3186.35	5734.88	3801.98
	490.215	4990.3	8090.97	3191.48	5756.82	3825.22
	492.072	5022.46	8044.87	3203.37	5772.43	3839.01
	493.93	5059.26	7978.02	3226.39	5802.07	3855.55
	495.787	5075.48	7924.02	3237.1	5799.15	3860.65
	497.643	5066.57	7891	3250.18	5811.62	3837.04
	499.5	5054.08	7898.21	3241.81	5787.99	3831.9
	501.355	5040.6	7861.88	3230.71	5778.05	3822.87
	503.211	5033.06	7871.16	3217.98	5775.62	3842.86
	505.066	5007.38	7895.3	3209.39	5724.8	3849.82
	506.92	4975.64	7914.64	3192.51	5710.9	3852.69
	508.773	4937.82	7899.67	3202.43	5732.98	3846.02
	510.627	4915.42	7920.42	3208.46	5718.39	3824.27
	512.48	4916.75	7890.85	3219.84	5725.11	3799.49
	514.334	4916.73	7878.64	3223.65	5733.3	3789.29
	516.186	4895.16	7866.49	3224.47	5770.61	3775.71
	518.039	4893.53	7907.65	3242.72	5779.35	3787.21
	519.891	4930.78	7970.53	3252.93	5781.44	3790.27
	521.74	4937.47	8037.85	3243.45	5824.71	3827.96
	523.592	4960.68	8095.98	3250.66	5842.01	3852.44
	525.443	4998.88	8170.97	3272.34	5849.48	3863.54
	527.293	5037.42	8195.35	3288.34	5878.91	3887.29
	529.143	5052.65	8231.12	3285.75	5920.4	3905.3
	530.99	5063.49	8274.33	3316.2	5939.13	3903.1
	532.84	5085.95	8329.88	3377.83	5927.1	3898.36
	534.688	5121.52	8395.31	3405.47	5958.78	3888.68
	536.537	5125.97	8457.34	3441.73	5983.33	3907.34
	538.385	5178.51	8526.13	3493.34	5991.15	3903.95
	540.23	5196.92	8581.98	3538.05	6038.52	3920.44
	542.078	5195.4	8616.58	3536.37	6104.8	3953.32
	543.924	5212.58	8669.57	3530.93	6148.17	3979.98
	545.77	5221.38	8677.14	3555.5	6159.42	3996.01
	547.615	5233.89	8724.5	3550.31	6182.99	4004.48
	549.461	5237.05	8745.73	3534.57	6208.87	3998.19
	551.305	5232.59	8791.31	3543.58	6219.87	4012.96
	553.15	5248.46	8839.56	3562.94	6226.62	3991.29
	554.994	5244.36	8868.46	3581.35	6261.81	3996.58
	556.838	5250.42	8885.83	3586.59	6276.67	3999.75
	558.68	5247.26	8896.4	3600.37	6288.62	4033.03
	560.523	5255.22	8906.67	3619.19	6294.68	4049.84
	562.365	5264.96	8970.14	3604.37	6328.66	4048.85
	564.207	5273.04	8972.14	3608.36	6332.66	4053.07
	566.049	5274.45	9044.14	3622.71	6349.6	4077.21
	567.889	5264.98	9093.13	3644.41	6380.88	4060
	569.73	5274.35	9127.69	3646.53	6408.85	4062.37
	571.57	5279.21	9181.95	3702.67	6414.03	4058.62
	573.41	5286.61	9238.45	3785.31	6438.3	4080.36
	575.25	5323.66	9305.87	3927.35	6434.58	4081.57
	577.088	5323.46	9386.63	4066.93	6462.9	4085.86
	578.928	5324.43	9427.18	4174.4	6478.65	4087.93
	580.766	5330.79	9503.73	4209.82	6502.09	4098.21
	582.604	5330.41	9577.98	4168.2	6536.54	4094.03
	584.441	5326.4	9625.12	4052.29	6560	4113.09
	586.277	5329.55	9689.48	3971.88	6587.09	4123.9
	588.115	5379.85	9750.14	3917	6585.62	4160.05
	589.951	5432.34	9757.82	3941.43	6620.4	4173.91
	591.787	5475.32	9768.46	3992.64	6662.24	4211.18
	593.623	5530.16	9789.71	4044.06	6701.93	4218.8
	595.457	5611.64	9873.47	4069.23	6734.13	4243.72
	597.291	5669.28	9971.39	4078.07	6783.6	4280.39
	599.125	5687.24	10044.4	4081.24	6848.55	4321.9
	600.959	5699.43	10107.8	4097.63	6916.26	4358.22
	602.793	5742.83	10179	4099.23	6972.89	4409.03
	604.627	5763.57	10230.6	4117.29	7057.94	4419.06
	606.459	5821.86	10249.7	4157.41	7105.96	4446.45
	608.291	5857.6	10279.5	4211.37	7179.62	4449.45
	610.123	5892.97	10358	4269.08	7220.36	4487.83
	611.955	5902.55	10397.7	4319.39	7230.2	4502.32
	613.785	5903.96	10416.9	4381.27	7238.16	4507.03
	615.615	5904.36	10432.7	4420.28	7233.44	4501.03
	617.445	5895.65	10485.6	4418.34	7243.51	4486.63
	619.275	5892.16	10537.5	4405.84	7234.3	4453.73
	621.105	5902.98	10581.6	4371.26	7219.96	4451.43
	622.934	5882.78	10601.6	4346.66	7248.24	4443.22
	624.762	5879.38	10654.7	4329.36	7248.74	4467.43
	626.592	5881.17	10652	4340.22	7249.6	4475.69
	628.418	5918.08	10689	4395.03	7261.03	4503.33
	630.246	5956.78	10734.8	4408.33	7314.29	4534.01
	632.072	5981.69	10794.5	4415.8	7380.58	4541.27
	633.9	6048.51	10858.8	4450.28	7426.13	4572.4
	635.727	6064.89	10955.1	4463.62	7451.47	4600.73
	637.551	6064.29	11009.1	4494.24	7473.8	4599.91
	639.377	6076.32	11048.9	4545	7466.85	4590.78
	641.201	6063.67	11061	4618.98	7463.39	4591.9
	643.027	6025.38	11145.5	4691.72	7430.81	4585.11
	644.852	5995.31	11159.3	4727.54	7445.07	4587.07
	646.674	5978.86	11173.3	4746.88	7472.57	4586.96
	648.498	5986.23	11208.1	4766.82	7497.67	4590.43
	650.32	5975.4	11255.5	4747.49	7526.73	4601.9
	652.143	5961.06	11303.8	4725.87	7560.2	4613.62
	653.965	5979.15	11358.5	4706.23	7589.2	4607.46
	655.787	6001.6	11401	4703.52	7627.93	4620.71
	657.609	6018.54	11482.7	4693.28	7613.86	4633.07
	659.43	6051.36	11533.7	4715.19	7611.35	4627.33
	661.25	6095.74	11564.1	4729.09	7646.64	4642.42
	663.07	6134.79	11607.6	4768.62	7665.89	4660.83
	664.891	6162.81	11645.2	4799.71	7682.49	4700.14
	666.709	6157.61	11752.6	4836.9	7687.56	4730.86
	668.529	6192.22	11840.7	4882.12	7735.84	4744.27
	670.348	6206.87	11881.5	4930.22	7786.34	4785.07
	672.166	6210.45	11944.7	4931.96	7784.25	4790.25
	673.982	6228.79	11991.8	4936.18	7820.51	4743.6
	675.801	6230.1	12076.4	4922.58	7867.83	4741.15
	677.617	6208.17	12117.8	4939.52	7901.18	4714.94
	679.434	6168.39	12104.6	4937	7895	4693.36
	681.25	6152.96	12175.3	4954.3	7886.26	4691.34
	683.066	6183.35	12205.4	5021.95	7936.41	4721.82
	684.883	6207.85	12218.2	5071.16	7974.28	4754.01
	686.697	6252.73	12265.4	5126.59	8011.26	4764.58
	688.512	6320.73	12309.8	5156.8	8082.07	4777.31
	690.326	6358.09	12437	5197.38	8100.85	4804.44
	692.141	6367.83	12482	5233.55	8161.98	4775.75
	693.953	6341.13	12479.1	5229.91	8175.67	4756.89
	695.766	6340.05	12570.1	5210.77	8173.1	4750.73
	697.578	6329.22	12610.8	5216.15	8196.6	4778.42
	699.391	6329.58	12630.1	5218.77	8188.13	4780.02
	701.203	6307.05	12688.2	5252.3	8181.69	4816.2
	703.014	6297.82	12730.4	5261.73	8182.93	4835.11
	704.826	6272.5	12817.3	5284.18	8164.84	4876.11
	706.637	6238.19	12878.2	5335.07	8198.77	4872.89
	708.447	6193.47	12900.5	5335.86	8202.86	4863.77
	710.256	6186.31	12941.3	5330.44	8218.87	4863.7
	712.066	6206.12	12918.8	5369.5	8256.38	4862.7
	713.875	6212.33	12927.6	5416.46	8272.86	4855.21
	715.684	6228.03	12990.8	5446.31	8319.72	4857.17
	717.492	6291.91	13041	5437.97	8355.55	4839.83
	719.301	6334.6	13117.3	5438.94	8380.79	4869.46
	721.107	6360.96	13200.3	5506.49	8387.42	4856.7
	722.914	6363.08	13293.1	5556.45	8381.55	4861.42
	724.721	6355.97	13338.3	5629.19	8388.52	4872.25
	726.527	6352.27	13390.2	5722.47	8402.77	4894.01
	728.334	6336.29	13470.2	5787.04	8407.72	4895.08
	730.139	6360.63	13538.3	5802.64	8463.3	4891.56
	731.943	6413.21	13551.4	5757.89	8490.5	4892.38
	733.748	6467.06	13547.3	5699.41	8519.18	4899.03
	735.553	6495.33	13565	5688.88	8531.33	4895.71
	737.357	6529.67	13652.7	5699.98	8562.72	4902
	739.16	6530.36	13687.1	5702.22	8601.38	4936.17
	740.965	6522.56	13778.4	5741.89	8612.89	4978.44
	742.768	6546.49	13850.7	5786.33	8634.08	4994.32
	744.568	6548.08	13923.8	5847.47	8691.65	5001.65
	746.371	6545.46	13945.8	5844.33	8736.91	5018.43
	748.174	6545.19	13953.8	5838.72	8767.84	5006.69
	749.975	6562.64	13972.5	5866.59	8799.49	5008.38
	751.775	6630.27	14091.4	5880.88	8846.39	5035.19
	753.576	6671.07	14180	5900.53	8872.37	5032.15
	755.375	6695.04	14303.5	5923.33	8884.37	5047.98
	757.176	6735.62	14409.6	5966.53	8933.27	5057.65
	758.975	6770.09	14530.1	6021.59	8967.25	5068.01
	760.773	6767.95	14548.3	6056.62	8997.51	5095.37
	762.572	6747.96	14620.8	6100.77	9024.5	5109.77
	764.369	6751.6	14684.4	6154.2	9075	5121.82
	766.168	6790.27	14769.5	6189.84	9110.18	5142.2
	767.965	6818.42	14842.4	6238.4	9124.22	5126.81
	769.762	6860.22	14880.4	6263.69	9152	5132.68
	771.559	6917.46	14952.7	6299.29	9190.22	5138.46
	773.354	6984.23	15034.8	6311.07	9191.93	5166.78
	775.15	6982.06	15090.2	6338.36	9215.17	5191.76
	776.945	6982.04	15177.6	6348.88	9238.39	5231.52
	778.74	6985.14	15244.3	6386.87	9275.33	5256.2
	780.535	6973.14	15290.4	6403.48	9323.53	5273.52
	782.33	6989.44	15338.5	6438.04	9350.01	5256.73
	784.123	7002.98	15374.9	6478.01	9346.82	5218.06
	785.916	7002.3	15464.4	6504.97	9375.58	5178.89
	787.709	6974.53	15563.2	6503.41	9384.18	5145.13
	789.502	6923.32	15631.7	6503.14	9417.56	5123.6
	791.295	6881.62	15664.3	6512.44	9438.35	5111.04
	793.086	6864.13	15748.9	6524.56	9445.97	5137.77
	794.877	6888.54	15809.5	6550.15	9462.3	5170.76
	796.668	6926.14	15890.2	6583.28	9467.47	5192.61
	798.459	6967.93	15968.8	6623.57	9455.75	5221.17
	800.25	7006.02	16063.9	6667.12	9513.04	5247.16
	802.039	7025.64	16121.9	6723.61	9513.42	5274.86
	803.828	7030.78	16123.8	6771.01	9512.36	5310.56
	805.619	7017.96	16152.2	6770.48	9524.54	5292.58
	807.406	7011.77	16206.7	6764.86	9537.63	5298.3
	809.195	7041.93	16236	6794.09	9545.46	5282.91
	810.982	7030.49	16302.5	6802.56	9601.54	5288.27
	812.771	7028.17	16349.7	6818.27	9649.87	5293.43
	814.559	7012.89	16430.4	6845.3	9699.33	5316.52
	816.346	7030.27	16527.8	6909.58	9692.58	5312.92
	818.131	7032.77	16615	6937.03	9669.99	5325.49
	819.918	7085.85	16737.8	6954.4	9675.76	5286.36
	821.703	7114.99	16818	6981.1	9698.37	5271.57
	823.488	7155.33	16865	7001.84	9737.53	5246.75
	825.273	7168.73	16910.8	7031.38	9789.85	5279.81
	827.057	7147.8	16943.1	7052.78	9844.09	5306.36
	828.842	7126.58	16954.8	7070.1	9886.32	5345.24
	830.625	7121.3	16987.9	7079.58	9906.04	5339.62
	832.408	7087.15	17046.2	7075.67	9910.73	5343.21
	834.191	7122.62	17161.1	7134.56	9923.86	5304.95
	835.975	7171.12	17269.5	7161.79	9937.15	5299.93
	837.756	7224.69	17353.4	7184.81	9932.34	5304.91
	839.537	7286.01	17425.7	7225.14	9946.43	5367.77
	841.318	7322.22	17527.2	7286.04	9996.94	5409.63
	843.1	7355.15	17602.9	7323.69	10041.3	5438.5
	844.881	7389.49	17688.8	7335.58	10081.3	5443.72
	846.66	7383.18	17760.3	7379.62	10118.8	5435.71
	848.441	7392.84	17876.2	7433.58	10164.3	5416.45
	850.221	7419.14	17985	7468.88	10198	5389.1
	852	7414.45	18042.9	7515.57	10205.8	5378.59
	853.777	7436.99	18092.4	7592.98	10255.9	5399.33
	855.557	7454.03	18172.2	7681.82	10311.8	5405.24
	857.334	7478.56	18242	7754.73	10356.9	5394.95
	859.111	7498.62	18334.5	7778.01	10410.9	5430.24
	860.889	7519.69	18370.4	7801.91	10444.5	5458.15
	862.666	7542.71	18479.2	7761.5	10500.2	5491.8
	864.441	7566.54	18608.8	7751.22	10550.7	5520.17
	866.219	7565.66	18725.6	7743.22	10570.9	5546.26
	867.994	7579.49	18838.3	7758.01	10614.4	5570.25
	869.77	7638.54	18888.2	7781.16	10675.6	5600.23
	871.543	7653.67	19008.5	7851.57	10702.4	5612.44
	873.318	7672.02	19087.1	7894.13	10707.4	5620.91
	875.092	7744.94	19175.1	7924.2	10720.6	5626.96
	876.865	7819.72	19270.7	7959.53	10764.6	5648.12
	878.639	7871.31	19445.1	8048.74	10804.1	5680.02
	880.412	7911.15	19525.6	8074.44	10836	5681.99
	882.184	7948.3	19573.8	8081.09	10913.6	5698.77
	883.957	7996.14	19594.1	8105.06	10980.6	5735.1
	885.729	7975.27	19713.6	8161.24	11032.4	5732.58
	887.5	7971.42	19775.5	8201.81	11053.7	5728
	889.271	7998.69	19871.9	8250.21	11076.1	5743.99
	891.041	8054.5	19922.7	8326.51	11136.1	5737.14
	892.812	8098.77	20061.3	8371.38	11203.4	5743.42
	894.582	8134.08	20106	8386.13	11235.4	5758.35
	896.352	8194.34	20195.8	8405	11270.2	5781.01
	898.119	8240.23	20265	8430.41	11256.8	5828.91
	899.889	8257.09	20347.9	8442.13	11302.1	5852.03
	901.656	8265.65	20383.2	8476.51	11317.1	5914.85
	903.426	8295.21	20466.9	8549.91	11366.3	5937.74
	905.193	8352.49	20545.3	8599.56	11470.1	5923.9
	906.959	8381.23	20662.7	8611.11	11558.9	5920.64
	908.727	8378.93	20730.3	8656.43	11596.1	5950.93
	910.492	8404.11	20848.7	8667.08	11643.1	5945.39
	912.258	8423.33	20889.8	8696.68	11617.5	5961.16
	914.023	8458.8	20936	8686.16	11610.8	5967.59
	915.789	8481.87	20981.2	8728.1	11581.2	5987.53
	917.555	8510.73	21089.6	8795.89	11633.4	5981.47
	919.318	8529.56	21248.5	8844.09	11668.1	5997.22
	921.084	8521.53	21379.5	8855.27	11708.2	6003.86
	922.848	8510.34	21440	8889.03	11735.1	6030.29
	924.609	8504.55	21526.6	8933.04	11810.5	6038.05
	926.373	8516.19	21565.9	8987.54	11802.7	6046.29
	928.137	8543.63	21671.6	9003.02	11803.2	6031.97
	929.898	8559.39	21767.1	9065.26	11786.2	6042.53
	931.66	8533.4	21844.7	9126.41	11825.8	6041.52
	933.422	8531.48	21947.5	9163.81	11855.6	6071.59
	935.182	8545.85	22030.7	9173.46	11901.4	6081.82
	936.943	8556.83	22068.9	9206.54	11908.3	6101.77
	938.703	8584.69	22149.9	9235.79	11998.2	6135.32
	940.463	8599.44	22202.5	9265.34	12044.9	6163.09
	942.223	8641.38	22343.1	9311.98	12113.5	6176.77
	943.982	8681.01	22412.8	9378.9	12164.8	6201.71
	945.74	8661.89	22461.4	9435.89	12265.5	6235.65
	947.5	8690.98	22552	9489.86	12321.9	6256.11
	949.258	8727.9	22670.7	9561.61	12338.9	6294.82
	951.016	8767.81	22769.3	9604.09	12367.8	6335.27
	952.771	8801.73	22889	9621.2	12408.7	6375.33
	954.529	8810.53	22965.9	9669.46	12449	6411.38
	956.285	8828.34	23104.5	9705.09	12492.3	6407.93
	958.041	8866.15	23183.3	9709.85	12537.3	6388.31
	959.797	8863.36	23298.8	9729.04	12551.9	6397.78
	961.553	8833.45	23407.6	9737.4	12481.6	6359.78
	963.309	8832.11	23528.4	9822.55	12445.2	6370.47
	965.062	8872.16	23672.1	9882.67	12499.7	6372.4
	966.816	8884.05	23763.9	9957.3	12506.9	6375.88
	968.57	8860.99	23840.4	10027.5	12538.5	6376.83
	970.324	8848.67	24009.2	10062.9	12605.4	6382.59
	972.076	8845.65	24117.3	10085	12633.7	6387.85
	973.83	8857.93	24191.9	10121.6	12664.4	6385.39
	975.582	8861.1	24215	10108.6	12698.8	6383.53
	977.334	8887.65	24259.8	10161.6	12775.4	6399.66
	979.086	8939.52	24304.1	10182.2	12872	6416.81
	980.838	8972.09	24327.5	10202.1	12892.6	6448.47
	982.588	8960.52	24379.3	10236.4	12916.3	6480.28
	984.338	8994.35	24542	10266.9	12951.4	6486.73
	986.088	8984.11	24692.1	10356.1	12985	6480.15
	987.838	9013.8	24786.1	10440.2	13051.6	6475.86
	989.588	9028.57	24957.9	10492.2	13106.2	6495.42
	991.336	9054.51	25052.1	10576.2	13168.5	6521.65
	993.086	9077.01	25128.6	10617.3	13188.8	6571.86
	994.834	9090.63	25222.6	10616.4	13195.8	6631.45
	996.582	9107.05	25320.9	10643.4	13224.1	6668.06
	998.328	9172.08	25426.3	10655.9	13247.3	6679.13
	1000.08	9216.84	25510.7	10694.7	13279.5	6691.38
	1001.82	9222.63	25513.8	10735.5	13282.9	6711.08
	1003.57	9245.66	25561.1	10796	13323.9	6722.15
	1005.31	9283.07	25509.3	10844	13377.9	6732.12
	1007.06	9257.47	25562.6	10850.6	13410.6	6761.96
	1008.8	9208.99	25606.1	10856.5	13430.4	6745.56
	1010.55	9196.08	25666.5	10848.9	13483.9	6709.31
	1012.29	9178.62	25750.9	10819.4	13503.1	6656.98
	1014.04	9175.32	25846.2	10821.4	13481.1	6659.96
	1015.78	9149.28	25958.6	10865.7	13495.8	6639.87
	1017.53	9185.29	26087	10922.6	13501	6623.77
	1019.27	9182.94	26130.9	10907	13484.1	6611.07
	1021.01	9154.42	26208	10913.8	13518.6	6636.93
	1022.75	9133.09	26217.4	10921.8	13495.2	6628.39
	1024.5	9126.23	26199.1	10944.8	13510.2	6615.69
	1026.24	9131.97	26272.8	10968.8	13509.9	6598.36
	1027.98	9153.81	26338	11014.7	13537.2	6644.91
	1029.72	9133.1	26432.8	11073.5	13601.7	6632.45
	1031.46	9147.43	26550.5	11107.5	13589.8	6642.84
	1033.2	9114.69	26629.6	11094.8	13589.4	6638.04
	1034.94	9122.38	26727.1	11118.3	13649.6	6647.08
	1036.68	9149.59	26787.1	11149.3	13616.4	6644.29
	1038.42	9205.42	26838.1	11223.4	13598	6647.4
	1040.15	9291.98	26933.5	11260.7	13621.5	6644.4
	1041.89	9337.85	26982.7	11327.6	13662.8	6664.43
	1043.63	9344.7	27023.8	11363.5	13698.4	6656.94
	1045.37	9345.49	27083.4	11402.8	13744.6	6669.85
	1047.11	9310.42	27175.6	11405.2	13778.1	6688.77
	1048.84	9314.94	27271.2	11432.9	13826.2	6721.11
	1050.58	9328.71	27321.8	11479.1	13839.3	6740.21
	1052.31	9319.89	27378.9	11524.1	13891.5	6778.19
	1054.05	9330.43	27519.5	11556.9	13958.2	6786.02
	1055.79	9301.9	27636.2	11613.8	13951.3	6808.44
	1057.52	9305.64	27698.9	11653.7	13954.8	6791.86
	1059.25	9290.43	27724	11724.2	14013.7	6777.26
	1060.99	9308.67	27804.6	11785.5	13990.9	6777.27
	1062.72	9370.19	27835.1	11853.4	14014.2	6802.07
	1064.46	9403.11	27928.6	11877.2	14033.7	6785.47
	1066.19	9387.94	27994.1	11921.4	14093.2	6807.05
	1067.92	9418.93	28146.6	11936.2	14150.7	6800.32
	1069.65	9418.63	28278.6	11955.4	14170	6835.79
	1071.38	9455.65	28307.3	12014.6	14209.4	6844.95
	1073.12	9493.41	28390.4	12027.6	14261.5	6882.8
	1074.85	9548.42	28465.3	12080.5	14281.7	6900.53
	1076.58	9561.3	28533.4	12090.1	14337.8	6927.02
	1078.31	9590.28	28661.9	12110.2	14350.8	6938.08
	1080.04	9589.43	28771.6	12159.9	14385.1	6980.66
	1081.77	9623.89	28915.3	12182.2	14403.9	6970.25
	1083.5	9656.07	29029.2	12259.7	14439.5	6987.68
	1085.22	9690.94	29131.9	12352.9	14452.7	6987.03
	1086.95	9716.47	29273.6	12399	14468.3	7028.86
	1088.68	9758.93	29313.9	12446	14520.2	7020.5
	1090.41	9754.95	29413.3	12469.8	14560.7	7035.14
	1092.14	9780.16	29477.2	12526.2	14548.2	7036.15
	1093.86	9792.03	29586.1	12546.5	14602.3	7054.79
	1095.59	9809.22	29641.7	12565	14602	7031.79
	1097.32	9840.3	29677.4	12631	14602.5	7065.77
	1099.04	9833.4	29820.9	12688.1	14633.1	7056.88
	1100.77	9813.31	29898.8	12717.9	14679.1	7069.38
	1102.49	9814.98	29988.5	12724.5	14711.7	7078.12
	1104.22	9810.48	30039.4	12723.3	14726.8	7094.37
	1105.94	9815.77	30089.1	12760.5	14675.8	7080.41
	1107.67	9828.77	30186.7	12759.1	14707.8	7115.8
	1109.39	9856.98	30290.8	12810.1	14681.6	7154.95
	1111.11	9918.62	30382.6	12880.1	14634.4	7203.85
	1112.84	9923.7	30519.7	12945.4	14679.8	7157.19
	1114.56	9909.15	30604.3	12955.2	14740.5	7152.9
	1116.28	9870.38	30702.3	12980	14794.6	7145.14
	1118	9892.47	30702.2	13007.7	14835.5	7137.9
	1119.72	9917	30681.4	13052.1	14867.1	7160.59
	1121.44	9927.01	30715.1	13087	14943.2	7201.96
	1123.16	9945.09	30754.1	13157.1	14980.1	7230.16
	1124.88	9959.19	30829.5	13243.9	14943.2	7248.92
	1126.61	9931.53	30942.6	13288.4	14964	7244.04
	1128.32	9895.9	31034.7	13301.2	14960.3	7266.46
	1130.04	9877.8	31223.4	13342.9	14922.1	7273.08
	1131.76	9911.93	31363.3	13331.4	14891.8	7288.52
	1133.48	9969.43	31437.9	13326.4	14903.4	7319.27
	1135.2	9986.88	31514.7	13335.6	14959.4	7368.13
	1136.92	9969.17	31513.3	13389.8	15003.5	7356.93
	1138.63	9967.1	31578.8	13455.6	15045.5	7382.45
	1140.35	9995.69	31577.2	13504.9	15072.5	7433.88
	1142.07	10006.2	31669.6	13558.5	15094	7462.39
	1143.79	10061.1	31834.1	13663.2	15110.7	7504.14
	1145.5	10098.8	31942	13677.8	15176.9	7535.92
	1147.21	10177.2	32124.7	13702.9	15206.8	7593.56
	1148.93	10194.6	32249.8	13730.9	15241.7	7647.6
	1150.65	10227.6	32361.5	13777.3	15294.9	7662.22
	1152.36	10291.9	32504.5	13855.1	15326.3	7685.84
	1154.07	10386.8	32565.2	13911.1	15351.6	7731.46
	1155.79	10461.9	32736.9	13954.2	15401.3	7790.24
	1157.5	10557.4	32927.6	14029	15531.8	7840.97
	1159.21	10594.8	33085.6	14106.8	15637.4	7898.07
	1160.93	10666.4	33295.2	14205.7	15731.1	7997.9
	1162.64	10734.3	33521.3	14315.7	15836.4	8047.77
	1164.35	10801.9	33756.8	14447.5	15907.2	8101.47
	1166.06	10870.1	33947.4	14590.3	15946.7	8104.56
	1167.77	10914.7	33970.8	14642.1	15993	8132.03
	1169.48	10997.6	34046.1	14670.4	15992.5	8150.5
	1171.2	11025.1	34162.6	14673.5	16052.4	8140.53
	1172.9	10985.1	34230.1	14721.7	16005.7	8138.92
	1174.62	10950.1	34287.7	14741.6	15964.1	8106.93
	1176.32	10928.1	34390.5	14756.4	15957.6	8077.18
	1178.03	10871.5	34419.9	14815	15873.8	8032.96
	1179.74	10804.2	34445.9	14842	15832.7	7991.61
	1181.45	10765.2	34450	14879.9	15793.8	7964.89
	1183.16	10777.4	34526.1	14895.7	15757.1	7952.41
	1184.87	10762.4	34662.4	14939.3	15774.9	7934.85
	1186.57	10731.3	34757.6	14959.3	15786.2	7928.24
	1188.28	10739.1	34748.1	14917.1	15776.1	7897.38
	1189.99	10756	34726.1	14865.2	15768.6	7899.04
	1191.69	10746.4	34670.9	14826.8	15729.4	7874.39
	1193.4	10741.8	34681.3	14768	15694.5	7874.03
	1195.1	10757	34701	14786.3	15674.9	7866.75
	1196.81	10777.8	34711.2	14796.3	15600.3	7878.4
	1198.51	10753.1	34820.6	14862.9	15589.2	7866.93
	1200.22	10728.6	34910.6	14889.9	15601.5	7890.61
	1201.92	10699.7	34998.8	14928.3	15594.5	7884.98
	1203.62	10659.7	35115.5	14908.2	15568.6	7889.94
	1205.33	10592.1	35196	14860.5	15595.4	7858.96
	1207.03	10579.7	35265.2	14841.1	15575.6	7859.04
	1208.73	10583.5	35266.8	14868.7	15607.9	7856.01
	1210.43	10614.9	35286.6	14872.1	15580.4	7865.36
	1212.14	10635	35322.4	14904.1	15626.7	7902.44
	1213.84	10712.9	35369	14918.8	15644.8	7915.92
	1215.54	10731.9	35396	14940.7	15658.2	7924.7
	1217.24	10792.5	35450.6	14924.6	15661.2	7953.78
	1218.94	10818.2	35483.9	14896	15680.9	7965.96
	1220.64	10823.9	35488.8	14916.6	15626.8	7993.49
	1222.34	10801.7	35566.8	14944.9	15611.9	7995.26
	1224.04	10758.3	35674.9	14981.7	15581.6	8017.11
	1225.74	10758.3	35741.2	15001.6	15584.5	8052.23
	1227.44	10769.7	35775.3	15066.5	15577.5	8040.01
	1229.13	10777.5	35768.5	15064.1	15620.1	8081.04
	1230.83	10868.7	35844.6	15097.1	15659.5	8105.31
	1232.53	10954.9	35876	15108.7	15694.6	8138.76
	1234.22	10998.3	36003.3	15130.4	15701.5	8189.09
	1235.92	11028.1	36131.7	15181	15700.6	8195.91
	1237.62	11069.6	36272.5	15244.5	15732	8206.41
	1239.31	11126.9	36413.4	15282.6	15776.2	8184.97
	1241.01	11155.5	36449.4	15355.3	15806.7	8195.87
	1242.71	11195.4	36466.2	15333.7	15845.7	8226.36
	1244.4	11244.7	36496.9	15372.2	15905	8206.88
	1246.09	11265.1	36498.6	15340.8	15901.7	8232.91
	1247.79	11286	36511.8	15338.1	15914.6	8301.24
	1249.48	11268.5	36521.5	15350	15882.6	8330.93
	1251.18	11222.6	36608.8	15375.1	15869.6	8305.92
	1252.87	11193.8	36744	15401	15858.3	8288.05
	1254.56	11185.4	36775.8	15443	15800.2	8310.78
	1256.25	11192.2	36859.6	15468.6	15760.9	8312.96
	1257.95	11219.6	36925.5	15475.3	15778.9	8307.64
	1259.64	11220.7	37019.7	15420.8	15777.9	8330.19
	1261.33	11265.4	37063.6	15387.3	15859.3	8392.55
	1263.02	11267.6	37203.8	15428.6	15943.5	8445.97
	1264.71	11263.9	37325.5	15499.7	15979.6	8474.72
	1266.4	11302.9	37365.3	15575.1	16018.9	8531.71
	1268.09	11308.3	37422.4	15693.5	16049.9	8560.08
	1269.78	11346.2	37467.5	15800.2	16052	8575.61
	1271.47	11399.6	37472.3	15880	16045.6	8558.68
	1273.16	11406.2	37535.3	15973.2	16050.8	8529.99
	1274.85	11422.3	37643.4	16041.9	16092.5	8515.82
	1276.53	11441.4	37789	16104.9	16133.2	8544.15
	1278.22	11425.2	37840.3	16159.8	16127.7	8624.65
	1279.91	11445.6	37871.6	16179.7	16141.5	8696.14
	1281.6	11439.9	37946.8	16167	16172.3	8706.66
	1283.28	11475.6	38068.7	16161	16130.2	8735.01
	1284.97	11537.3	38119.5	16152.1	16126.4	8761.34
	1286.65	11542.4	38204	16170.2	16132.6	8759.27
	1288.34	11578.6	38347.5	16201.9	16131.7	8753.62
	1290.02	11628	38537.7	16200.8	16195.2	8804.46
	1291.71	11622.9	38631.7	16253.2	16262.9	8893.76
	1293.39	11711.9	38801.9	16309	16323.1	8963.27
	1295.08	11774.6	38811.9	16255	16405	9010.24
	1296.76	11809.1	38962.3	16236.4	16432.6	9095.86
	1298.45	11879.6	38937.7	16187.8	16479.3	9168.69
	1300.13	11913.4	38975.7	16200.2	16474.4	9176.17
	1301.81	11966.4	39001.2	16208.4	16479.9	9169.75
	1303.49	11976.8	39048.9	16221.5	16578.8	9179.16
	1305.17	12016	39190.2	16324.4	16635.6	9201.95
	1306.86	12073.4	39349.6	16402.5	16706.4	9225.51
	1308.54	12112.2	39358.3	16399.8	16729.9	9272.09
	1310.22	12183.2	39440.3	16506.1	16781.6	9331.41
	1311.9	12309	39531	16520.6	16787.4	9449.64
	1313.58	12414.3	39628.9	16585.5	16806.4	9526.56
	1315.26	12520.4	39673.5	16606.1	16866.2	9663.07
	1316.94	12612.7	39682.3	16658.8	16952.7	9776.5
	1318.62	12739.9	39781.7	16693.2	16996	9865
	1320.29	12849.2	39914.3	16689	17057.8	9952.76
	1321.97	12932.5	39983.6	16737.9	17106.1	10026
	1323.65	13058.3	40026.8	16811.7	17141	10081.3
	1325.33	13112.5	40166.3	16816.9	17136.2	10135.9
	1327.01	13093.5	40286	16899	17218.3	10093.9
	1328.68	13089.6	40303.4	16940.9	17244.4	10099.1
	1330.36	13015.8	40227.7	16978.7	17247.1	10043.2
	1332.04	12919.8	40102.5	16929.3	17189.1	9962.47
	1333.71	12827.1	40035.7	16853.8	17161.7	9875.3
	1335.39	12684.3	39945.1	16838.2	17063.9	9806.36
	1337.06	12590.4	39769.1	16715.2	16867.5	9723.01
	1338.74	12431	39687.6	16590.7	16685.2	9588.44
	1340.41	12289	39623.5	16493	16522.5	9441.97
	1342.09	12184.3	39485.1	16333.7	16353.3	9315.99
	1343.76	12060.4	39417.4	16173.1	16259.3	9230.91
	1345.43	11929.2	39309.3	16048.1	16129.5	9164.81
	1347.11	11878.6	39286.8	15931.9	16074.5	9088
	1348.78	11811.2	39340.3	15887.3	15941.3	9077.54
	1350.45	11797.3	39408	15837.3	15858.8	9069.37
	1352.12	11775.4	39419.5	15814.2	15824.6	9057.77
	1353.8	11754.8	39410.5	15806.9	15807.5	9058.09
	1355.47	11721.8	39345.6	15776.6	15809.5	9021.56
	1357.14	11710.4	39401.9	15746.5	15886	9006.94
	1358.81	11659.2	39342.1	15784.9	15875.5	9000.02
	1360.48	11673.9	39387.2	15773.6	15939.7	9014.02
	1362.15	11662.2	39412.9	15785.5	15941.8	9027.13
	1363.82	11711.4	39486	15799	15948.1	9045.43
	1365.49	11724.8	39555	15727.2	15959.5	9072.52
	1367.16	11745.9	39595.4	15664.6	15942	9088.98
	1368.82	11765.1	39512.7	15633.2	15857.9	9064.72
	1370.49	11788.7	39512.4	15609	15796.7	9026.76
	1372.16	11764.1	39444.5	15660	15730.4	9034.26
	1373.83	11719.1	39472.6	15647.8	15733.7	9057.82
	1375.5	11669.6	39429	15697.1	15755.2	9052.32
	1377.16	11651.2	39455.6	15732.2	15806.4	9063.93
	1378.83	11635.3	39502.2	15723.8	15856.5	9075.35
	1380.49	11663.9	39511	15763.4	15857.2	9088.24
	1382.16	11693.1	39461.8	15799.6	15806.3	9079.87
	1383.83	11719.1	39508.4	15818.8	15760	9078.22
	1385.49	11707.9	39538.8	15840.3	15711.1	9106.86
	1387.15	11686.6	39658.2	15861.3	15668.3	9078.34
	1388.82	11683.9	39652.1	15885.1	15719.7	9076.79
	1390.48	11681.5	39732.3	15869.7	15737.5	9094.41
	1392.15	11706.2	39755.2	15854.4	15773.5	9119.83
	1393.81	11740	39731.7	15849.2	15777.8	9134.72
	1395.47	11789.2	39733.8	15788.1	15755.3	9156.8
	1397.13	11776.6	39674	15767.4	15726.3	9201.35
	1398.8	11775.4	39624.8	15726.9	15695.7	9228.16
	1400.46	11782	39622.2	15700.1	15677.2	9251.12
	1402.12	11779.2	39656.2	15685.7	15700	9286.93
	1403.78	11785.7	39702.7	15698.1	15651.6	9312.45
	1405.44	11819.1	39777.4	15751	15681.6	9334.42
	1407.1	11862	39766.4	15811	15688.4	9332.52
	1408.76	11888.5	39772.1	15812.1	15671.7	9331.42
	1410.42	11906.5	39718	15863.4	15700	9339.1
	1412.08	11916	39767.7	15843.2	15738.1	9324.95
	1413.74	11917	39800.6	15752.9	15782.5	9355.99
	1415.4	11891.7	39840	15729.2	15817	9333.63
	1417.06	11874.7	39818.7	15725.7	15807.4	9325.96
	1418.71	11884.2	39764.7	15695.9	15787.7	9353.96
	1420.37	11881.8	39732.7	15738.1	15742.1	9368.57
	1422.03	11891.4	39668.1	15741.6	15716.6	9409.39
	1423.69	11955.3	39720.6	15798	15706	9440.32
	1425.34	11945.2	39692.6	15815.7	15641.2	9487.39
	1427	11956.2	39611.7	15796.6	15626.2	9513.14
	1428.66	11963.2	39581.9	15822.1	15623	9503.13
	1430.31	11983.1	39583.3	15848.5	15604.5	9493.43
	1431.97	12038	39476	15829.9	15616.3	9489.6
	1433.62	12083.2	39553.1	15875.5	15720.7	9520.6
	1435.28	12150.6	39589.1	15861.3	15806	9583.57
	1436.93	12223	39711.4	15866	15878.3	9631.97
	1438.58	12257.4	39621	15913.6	15896.7	9759.19
	1440.24	12301.4	39566.9	15936.7	15969.8	9854.72
	1441.89	12368.3	39548.9	16001.7	15994.4	9965.8
	1443.54	12488	39473.5	16083.4	16016.4	9976.45
	1445.2	12568.9	39358.9	16113.7	16077.8	10009.8
	1446.85	12636.7	39375.1	16129.2	16167	10086.1
	1448.5	12678.6	39368.4	16143.4	16201.4	10141
	1450.15	12697.3	39460	16172.1	16241.6	10172.1
	1451.8	12690.8	39350.7	16240.9	16247.3	10255.9
	1453.45	12674.4	39369.6	16190.6	16219.8	10303.4
	1455.1	12692.4	39271.7	16154.5	16169.7	10311.5
	1456.75	12705.6	39161.2	16093	16139	10246
	1458.4	12678.2	39004.2	16006.7	16058.7	10209.5
	1460.05	12586.8	38933.9	15906.5	15951.1	10169.6
	1461.7	12493.5	38845.4	15883.4	15810.9	10120.3
	1463.35	12356.1	38861.7	15881.5	15692.8	10079.2
	1465	12257.6	38765.1	15829.5	15552	10033.9
	1466.64	12167.7	38700.8	15734.2	15409.6	9983
	1468.29	12176.2	38637.6	15692.5	15369	9969.34
	1469.94	12151.4	38559	15628.1	15395.8	9952.66
	1471.59	12189.5	38499.4	15591.1	15421.5	9982.11
	1473.23	12186.6	38445.5	15585.4	15483.3	9997.74
	1474.88	12218	38434	15657.5	15533.8	10038.8
	1476.53	12221.6	38412.8	15705.6	15622.4	10127.5
	1478.17	12328.8	38305.1	15773.8	15648	10167.5
	1479.81	12418.2	38211.7	15792.8	15698.5	10242.5
	1481.46	12552.4	38249	15871.8	15763.7	10323.1
	1483.1	12653.8	38268.3	15918.3	15816.1	10340.6
	1484.75	12778.6	38314.6	15964	15873.8	10419.5
	1486.39	12869.1	38451.9	16017.6	15949.9	10450.5
	1488.04	12908.9	38549.6	16058.1	16071.7	10518.4
	1489.68	12948.1	38601.4	16114.8	16183.6	10621.5
	1491.32	13034.6	38599.1	16207.2	16263.8	10730.6
	1492.96	13094.2	38610.6	16261.3	16390.8	10841.3
	1494.61	13162.9	38596.4	16373.5	16472.6	10936.2
	1496.25	13257.5	38551.2	16434.3	16491.8	10974.1
	1497.89	13300.4	38458.1	16475.5	16485.2	11005.3
	1499.53	13379.7	38469.1	16519.5	16461.8	10997.6
	1501.17	13357.6	38397.5	16487.6	16469	10976.8
	1502.81	13345.4	38415.5	16453.2	16448	10941.9
	1504.45	13330.4	38456.1	16387	16391	10904.6
	1506.09	13297.2	38501.4	16282.8	16412.5	10825.8
	1507.73	13188.1	38510.5	16169.2	16321.1	10809.5
	1509.37	13112.4	38414.9	16083.5	16206.8	10749.3
	1511.01	12983.8	38258.1	15993.1	16067.8	10704.4
	1512.64	12894.8	38072.7	15901.7	15910.4	10683.8
	1514.28	12752.7	37887	15819.5	15812.6	10663
	1515.92	12673.7	37772.9	15744.9	15723.7	10602.3
	1517.56	12668.8	37648.9	15664.6	15634.1	10556.6
	1519.19	12640.6	37589	15579.9	15588.7	10478.2
	1520.83	12598.7	37586.2	15556.9	15470.2	10458.3
	1522.47	12622.5	37469.8	15565.6	15417.7	10382.5
	1524.1	12606.4	37439.9	15526.2	15322.3	10376.4
	1525.74	12592.5	37395	15479.2	15252.3	10403
	1527.37	12590	37353.4	15437.7	15211	10432.7
	1529.01	12563.4	37316	15382.5	15185	10444.9
	1530.64	12573.7	37312.8	15323.1	15190.7	10456.4
	1532.28	12537.9	37197.7	15289.7	15177.5	10465.5
	1533.91	12558.1	37144.7	15277.7	15152.7	10459.7
	1535.54	12624.5	36969.7	15236.6	15165.2	10432.8
	1537.18	12657.8	36901.7	15196.9	15107.2	10445.6
	1538.81	12707.5	36811.7	15215.1	15115.1	10515.1
	1540.44	12767.3	36779.2	15193.3	15125.3	10529.7
	1542.07	12786.7	36742.6	15153.4	15146.7	10543.1
	1543.71	12747.2	36746.9	15186.3	15200.5	10575.8
	1545.34	12688	36620	15208.2	15173.8	10625.7
	1546.97	12670.7	36597.8	15216.8	15139.9	10623.5
	1548.6	12676.6	36490.9	15149.6	15062	10613.4
	1550.23	12616.6	36409.2	15103.1	14980.4	10577.9
	1551.86	12539.9	36336.6	15120.3	14914.7	10531.2
	1553.49	12496.3	36247.1	15076.6	14861.5	10467.1
	1555.12	12436.9	36123.2	15023.4	14796.1	10433
	1556.75	12346.7	35969.8	15041.9	14742.7	10442.5
	1558.38	12334.7	35839.9	15042.5	14670	10422
	1560	12329.4	35759.4	15021	14620.1	10400.3
	1561.63	12321.5	35567.1	14950.2	14576.5	10359.3
	1563.26	12327.3	35409.9	14884.3	14577.8	10330.3
	1564.89	12288	35342.4	14816.5	14487.4	10255.2
	1566.51	12243.2	35217.4	14732.3	14404.9	10252.5
	1568.14	12158.5	35208	14669.8	14305.4	10244.2
	1569.77	12113.2	35202	14622.7	14221.7	10243.7
	1571.39	12087.9	35135.9	14602.4	14183.5	10212.4
	1573.02	12028.1	35012.2	14559.6	14127.9	10193
	1574.64	11957.8	34878	14521.3	14103.4	10153.2
	1576.27	11922.7	34768.9	14510.8	14099.9	10131.1
	1577.89	11869.1	34634	14479.1	14023.3	10087.3
	1579.52	11803.2	34586.1	14465.8	13963.7	10054.7
	1581.14	11747.8	34635.1	14463.5	13922.2	10003
	1582.76	11749.2	34674.4	14477.4	13946.3	10005.7
	1584.39	11767.3	34575.2	14471.5	13954.3	10007.8
	1586.01	11817.6	34495.2	14436.8	13938.6	10044.6
	1587.63	11825.1	34465.1	14476.8	13906.3	10076.6
	1589.25	11875.2	34360.2	14553.5	13868.8	10116.5
	1590.88	11891.8	34181.1	14600.7	13903.8	10201.4
	1592.5	11919.2	34100.5	14640.9	13908.9	10244
	1594.12	11942.2	34078.7	14679.6	13948.2	10310.8
	1595.74	11977.9	34036.4	14745.6	14024.7	10388.1
	1597.36	12034.7	34043.1	14797.5	14116.5	10456.8
	1598.98	12153.4	34164.3	14865.7	14229.3	10556.7
	1600.6	12313.4	34291.5	15034	14341.4	10685.9
	1602.22	12559.9	34437.9	15182.4	14498.6	10878.1
	1603.84	12802.1	34585.7	15352.8	14785.4	11155.1
	1605.46	13127.5	34673	15543	15056.5	11443.2
	1607.08	13447.6	34785.6	15718.4	15377.1	11775.1
	1608.69	13785.4	34851.4	15897.8	15683	12084.5
	1610.31	14014.5	34962.1	16047.8	15961	12394.4
	1611.93	14191.8	35026.3	16188.6	16094.3	12581.5
	1613.55	14247.4	34999.3	16286.5	16121.5	12658.5
	1615.16	14133.3	35008.4	16247.6	16006.6	12606.6
	1616.78	13903	34960	16100.4	15791.4	12433.1
	1618.4	13622.2	34830.3	15885.1	15543.7	12176.8
	1620.01	13308.2	34711.8	15615.2	15280.5	11876.6
	1621.63	13073.4	34590.7	15373.9	15026.1	11583.7
	1623.24	12790.3	34453.8	15145	14829.3	11398.8
	1624.86	12572.2	34257	15015.3	14622	11177.2
	1626.47	12377	34135.2	14896.5	14453.5	10992
	1628.09	12205	33986.5	14765.1	14238	10820.8
	1629.7	12040.1	33740.3	14632.6	13998.1	10661.3
	1631.31	11911.3	33549.4	14467.3	13803	10544.6
	1632.93	11823.7	33400.8	14355.5	13666.1	10433.9
	1634.54	11753.5	33306.3	14246.9	13516.7	10312.3
	1636.15	11604.1	33192.4	14106.6	13407.2	10263.3
	1637.76	11455.6	32998.1	14038	13330.6	10202.8
	1639.37	11297.5	32957.4	13916.9	13281.1	10179.9
	1640.99	11176.4	32769.1	13853	13205.9	10146.6
	1642.6	11025.8	32554	13817.1	13085.7	10125.3
	1644.21	10929.8	32437.3	13741.7	13026.8	10138
	1645.82	10922.2	32370.2	13714.8	12944.3	10128.6
	1647.43	10888	32350	13661	12825.4	10076.1
	1649.04	10830	32286.7	13626	12715.6	10016.8
	1650.65	10776.1	32132	13650.8	12611.5	9971.49
	1652.26	10720.7	32065.7	13623.5	12569.2	9955.01
	1653.87	10663.9	32003.7	13636	12523.1	9902.6
	1655.47	10576.5	31920.9	13598.9	12482.5	9865.89
	1657.08	10541.2	31893.5	13527.5	12475.2	9843.22
	1658.69	10551.2	31850.7	13459.7	12420.1	9828.06
	1660.29	10517	31783	13374.1	12430.8	9804.97
	1661.9	10487.6	31709.7	13346.4	12387.1	9809.77
	1663.51	10417.1	31633.8	13332.5	12353.9	9851.4
	1665.12	10386.5	31479.4	13321.7	12358.9	9882.39
	1666.72	10331.8	31354.7	13310.5	12337.1	9882.28
	1668.33	10279.9	31198	13267.9	12324.3	9880.29
	1669.93	10287	31063.3	13191.6	12259.3	9843.14
	1671.54	10295.3	30904.9	13121.4	12212	9814.86
	1673.14	10260.6	30780.4	13055.4	12200.1	9756.31
	1674.75	10230.8	30730	13054.1	12135.8	9728.77
	1676.35	10203.8	30746.4	13018.5	12086.4	9754.6
	1677.96	10178.4	30655.7	12994	12018.1	9753.02
	1679.56	10098.2	30639.2	12988.4	11962	9725.81
	1681.16	10063.6	30517.2	12960.3	11915.8	9721.71
	1682.76	10038.5	30438	12932.9	11841.8	9685.72
	1684.37	9993.32	30315.6	12891	11821.7	9678.43
	1685.97	9946.52	30218.6	12895.5	11800.5	9653.25
	1687.57	9941.73	30163.5	12880.3	11760.7	9680
	1689.17	9961.82	30107.4	12856.2	11718.9	9691.37
	1690.77	9927.18	30101.7	12866.2	11675.6	9703.6
	1692.37	9899.11	30083.1	12841.6	11666.9	9668.53
	1693.97	9878.22	29997.3	12790	11630.5	9643.31
	1695.57	9857.8	29962.4	12753.4	11610	9609.9
	1697.17	9846.68	29883.7	12690.6	11567.9	9648.67
	1698.77	9856.43	29842	12655.4	11540.1	9660.31
	1700.37	9817.62	29828.4	12618.1	11488.6	9707.22
	1701.97	9791.51	29754	12570.4	11517.9	9688.83
	1703.57	9795.17	29721.7	12564.3	11520.6	9672.35
	1705.17	9798.34	29678.4	12539.9	11545.6	9661.56
	1706.76	9784.82	29602.2	12512.5	11516.1	9630.3
	1708.36	9779.5	29535.7	12477.9	11466.2	9609.35
	1709.96	9778.29	29450.9	12464.4	11405.9	9617.61
	1711.55	9762.78	29445.9	12433.2	11370	9577.91
	1713.15	9736.67	29404.6	12446.9	11309.3	9589.77
	1714.75	9737.08	29331.4	12445.6	11317.7	9577.61
	1716.34	9788.57	29264	12449.2	11293	9576.18
	1717.94	9776.04	29200.9	12483.2	11311.2	9621.81
	1719.53	9783.35	29116.8	12475.8	11310.3	9623.69
	1721.13	9749.19	29024.6	12454.5	11267.4	9654.36
	1722.72	9688.76	28979.8	12427.7	11263.1	9676.1
	1724.32	9646.62	28977.5	12347.3	11242	9676.54
	1725.91	9636.62	28918.2	12350.2	11214.7	9669.83
	1727.5	9622.09	28907.8	12382.4	11178.5	9664.85
	1729.1	9634.21	28863.8	12369.1	11133.7	9660.7
	1730.69	9621.55	28816	12401.9	11148.8	9666.51
	1732.28	9637.8	28789.9	12396	11141.9	9652.52
	1733.88	9644.99	28742	12342.8	11088.1	9665.4
	1735.47	9609.11	28759.8	12273.4	11108	9660.61
	1737.06	9590.93	28733.8	12229.7	11103.1	9640.64
	1738.65	9575.81	28715.2	12173.6	11095.5	9617.94
	1740.24	9565.92	28658.7	12179.2	11059.4	9611
	1741.83	9549.12	28539.1	12198.8	11036	9585.97
	1743.42	9547.2	28502.3	12193.9	11030.9	9623
	1745.01	9525.11	28387.2	12193.5	10997.1	9599.79
	1746.6	9477.57	28330.7	12183.5	10919.9	9600.65
	1748.19	9426.45	28237.5	12192.7	10926.7	9599.84
	1749.78	9408.91	28155.4	12213.2	10899.7	9621.11
	1751.37	9413.02	28095	12156.1	10880.7	9644.08
	1752.95	9423.08	28023.5	12146	10838.2	9628.22
	1754.54	9439.72	27941.1	12117.6	10828.5	9603.92
	1756.13	9480.64	27925.4	12035.7	10804.9	9593.79
	1757.71	9455.62	27880.3	12055.7	10805.8	9550.17
	1759.3	9427.33	27846.9	12067.9	10746.6	9524.84
	1760.89	9397.09	27740.6	12051.6	10755	9515.73
	1762.47	9376.31	27693.1	12074.9	10740.4	9545.78
	1764.06	9345.49	27630.7	12085.6	10740.2	9590.4
	1765.65	9329.65	27594.8	12017.5	10721.1	9571.29
	1767.23	9322.68	27561	11977.4	10700.1	9568.15
	1768.82	9343.22	27565.7	11916.3	10666.2	9535.61
	1770.4	9329.87	27555.2	11935.1	10635.3	9505.99
	1771.98	9296.48	27511.5	11887.5	10599.5	9480.49
	1773.57	9284.42	27415.3	11846	10591.8	9505.28
	1775.15	9261.14	27372.6	11868.5	10604.1	9523.34
	1776.74	9221.06	27274.6	11890.4	10630.8	9538.54
	1778.32	9249.65	27176.6	11867.2	10619.2	9499.86
	1779.9	9253.26	27052.6	11872.7	10624.9	9449.72
	1781.48	9299.34	27012.4	11880.5	10599.8	9385.7
	1783.06	9307.54	26943.2	11911.3	10532.1	9351.63
	1784.65	9234.11	26939.7	11879.4	10478.9	9339.23
	1786.23	9261.72	26901.6	11872.1	10419	9366.45
	1787.81	9248.43	26879.1	11845.3	10401.9	9365.62
	1789.39	9242.57	26772.4	11787.9	10354	9387.14
	1790.97	9229.92	26678.7	11769.8	10333.8	9387.37
	1792.55	9204.03	26511.8	11745	10352.8	9382.05
	1794.13	9173.72	26461.2	11739	10358.2	9376.45
	1795.71	9151.08	26429.5	11730	10325.3	9357.33
	1797.29	9111.83	26402.7	11705	10288	9321.87
	1798.87	9145.21	26347.4	11695.2	10248.7	9313.47
	1800.44	9166.43	26266.7	11663.5	10211.5	9312.12
	1802.02	9186.31	26157.2	11617.8	10153.9	9335.31
			4131.65	2131.97
			4191.08	2071.14
			4146.5	2074.53
			4128.89	2054.82
			4136.96	2115.96
			4011.59	2062.89
			3944.01	2131.69
			4061.1	2106.85
			4155.07	2061.51
			3999.05	2093.09
			4080.17	2155.42
			4002.39	2154.94
			4032.24	2151.9
			4041.59	2198.8
			3933.14	2216.23
			3936.1	2197.82
			4051.68	2157.66
			3922.83	2187.88
			3815.79	2161.81
			3901.9	2230.39
			3908.7	2236.28
			3927.01	2274.14
			4018.15	2263.4
			3973.81	2270.57
			3935.88	2308.38
			3963.1	2357.68
			3863.89	2343.11
			3943.45	2410.24
			3918.32	2441.61
			3903.41	2461.49
			3951.02	2415.01
			3974.37	2436.15
			3951.81	2496.82
			3930.53	2516.66
			3922	2512.27
			3963.18	2455.64
			3888.4	2455.09
			3951.22	2518.23
			3875.2	2492.2
			3873.06	2522.2
			3935.84	2469.45
			3839.52	2473.99
			3780.13	2517.97
			3827.62	2517.4
			3867.47	2567.71
			3892.03	2544.25
			3778.02	2542.41
			3775.91	2549.47
			3860.2	2545.09
			3798.36	2698.23
			3788.62	2529.98
			3744.6	2539.57
			3757.72	2668.49
			3843.19	2622.2
			3792.84	2659.68
			3840.2	2667.97
			3862.17	2659.76
			3922.18	2687.07
			3930.17	2682.66
			3907.75	2713.75
			4015.85	2708.07
			3913.6	2740.41
			3925.39	2711.93
			3948.57	2727.78
			3980.61	2762.62
			3835.41	2720.23
			3810.51	2768.98
			3866.59	2686.12
			3778.44	2839.84
			3838.3	2783.56
			3832.38	2786.73
			3812.56	2820.23
			3735.88	2817.08
			3759.05	2824.03
			3826.42	2780.44
			3744.73	2792.45
			3756.52	2813.29
			3850.36	2836.64
			3825.52	2751.44
			3767.88	2771.02
			3764.51	2824.64
			3749.79	2937.52
			3784.26	2864.99
			3764.5	2871.91
			3830.46	2833.45
			3791.79	2875.66
			3749.37	2905.25
			3778.75	2893.27
			3804.35	2800.69
			3798.46	2931
			3764.88	2922.79
			3712.44	2920.87
			3756.9	2969.29
			3764.86	2918.3
			3786.65	3014.48
			3714.14	2986.15
			3788.73	3083.52
			3794.16	3087.86
			3839.8	3088.42
			3828.88	3164.36
			3848.12	3154.85
			3840.98	3200.6
			3924.22	3243.82
			3967.27	3251.88

## Sheet: Figure S5
Figure S5A	Wavenumber	Control	3.5 µM Aß		Figure S5B	Control	3.5 µM Aß
	1800.57	22864.5	16754			0.105822	0.229803
	1798.99	23012.7	16759.4			0.188445	0.231949
	1797.42	23007.4	16879.6			0.202877	0.222524
	1795.84	23113	16800.7			0.17007	0.140312
	1794.26	23145.7	16887.8			0.502288	0.089961
	1792.68	23296.4	17046.4			0.192851	0.141104
	1791.1	23357.1	16985.9			0.259655	0.161557
	1789.52	23388.3	17121.8			0.236294	0.124296
	1787.94	23470.8	17120.4			0.117359	0.47455
	1786.36	23640.3	17242.4			0.226818	0.331993
	1784.78	23634.7	17244.8			0.217486	0.307814
	1783.19	23710	17328.2
	1781.61	23825.7	17345.5
	1780.03	23871.4	17389
	1778.45	23878.3	17506.4
	1776.86	23914.5	17487.5
	1775.28	24035.4	17608.5
	1773.7	24105.6	17644.9
	1772.11	24150.1	17697.4
	1770.53	24267.8	17725
	1768.94	24283.5	17713.8
	1767.36	24411.8	17882.7
	1765.78	24484.7	17821.4
	1764.19	24467	17848.9
	1762.6	24548	17948.6
	1761.02	24619.2	18036.9
	1759.43	24641.2	18028.3
	1757.84	24758.1	18150.2
	1756.26	24677.5	18150.4
	1754.67	24817	18219.5
	1753.08	24778.6	18257.3
	1751.49	24944.5	18263.9
	1749.91	24916.7	18259
	1748.32	24911.4	18311.4
	1746.73	24984.6	18345.1
	1745.14	25000.7	18452.3
	1743.55	25004.9	18466.9
	1741.96	25110.6	18468.4
	1740.37	25119.5	18510
	1738.78	25149.7	18553.2
	1737.19	25171.1	18551.3
	1735.6	25226.7	18601.8
	1734	25301.5	18635.1
	1732.41	25349.3	18788.2
	1730.82	25404.6	18747
	1729.23	25351.5	18758
	1727.63	25418.9	18851.7
	1726.04	25457.6	18837.4
	1724.44	25577.8	18838.2
	1722.85	25526.1	18887.4
	1721.26	25568.5	18916.1
	1719.66	25598.2	19015
	1718.07	25632.8	19043.5
	1716.47	25603.6	19060
	1714.88	25682.2	19123.7
	1713.28	25736.3	19065.6
	1711.68	25815.8	19267.1
	1710.09	25852.1	19199.5
	1708.49	25987.4	19217.3
	1706.89	26038.5	19316.4
	1705.3	26094.7	19315.1
	1703.7	26128	19421.3
	1702.1	26136	19484.5
	1700.5	26307	19458.9
	1698.9	26314.4	19561
	1697.3	26289.6	19622.3
	1695.7	26433.3	19638.2
	1694.1	26479.3	19765.5
	1692.5	26561.5	19780.4
	1690.9	26594.2	19805.7
	1689.3	26734.4	19961.9
	1687.7	26785.6	19925.3
	1686.1	26849.8	20069.9
	1684.5	26946.8	20093.3
	1682.89	27023.9	20094.8
	1681.29	27055.2	20293
	1679.69	27136.7	20285.7
	1678.08	27329.8	20352.9
	1676.48	27362.6	20387
	1674.88	27506.1	20417
	1673.27	27532.5	20518
	1671.67	27701.7	20651.1
	1670.06	27712.7	20627.6
	1668.46	27830.6	20739.2
	1666.85	27911.6	20814.9
	1665.25	27962.8	20900.2
	1663.64	28096.8	20914.9
	1662.03	28141.3	21075.8
	1660.43	28270.5	21115.5
	1658.82	28349.6	21152.9
	1657.21	28426.8	21264.4
	1655.6	28506.8	21346.9
	1653.99	28505.9	21377.7
	1652.39	28762.6	21586.2
	1650.78	28836.1	21624.3
	1649.17	28946.5	21695.3
	1647.56	28940.3	21813.8
	1645.95	29157.9	21957.5
	1644.34	29147.7	22010.8
	1642.73	29395.3	22184
	1641.12	29481.4	22326.5
	1639.5	29615.6	22549.4
	1637.89	29810.3	22787
	1636.28	30114.3	23000
	1634.67	30324.1	23264.3
	1633.06	30567.7	23594.8
	1631.44	30949.7	23938.2
	1629.83	31319.8	24410.1
	1628.21	31624.5	24813.8
	1626.6	32189	25425
	1624.99	32645	25935.1
	1623.37	33231.2	26526
	1621.76	33997.4	27305.3
	1620.14	34822	27928.6
	1618.53	35622.9	28552.5
	1616.91	36035.9	29102.7
	1615.3	36524.8	29376.2
	1613.68	36631.9	29494.2
	1612.06	36494.1	29190.9
	1610.44	35870.7	28708.3
	1608.82	35112.9	28078.4
	1607.21	34374.8	27403.6
	1605.59	33721	26665.2
	1603.97	32985.9	26020.9
	1602.35	32518.5	25502
	1600.73	31974.9	25053.4
	1599.11	31638.5	24667
	1597.49	31360.1	24360.3
	1595.87	31181.1	24099.4
	1594.25	31077.4	23971.7
	1592.63	30946.2	23825.2
	1591.01	30947.6	23728.6
	1589.39	30902.4	23588.1
	1587.76	30900.5	23618
	1586.14	30741.2	23505.5
	1584.52	30754.2	23510.1
	1582.89	30905.3	23555.1
	1581.27	30919.7	23567
	1579.65	30989.9	23596.7
	1578.02	30914.6	23668.2
	1576.4	31020	23680.8
	1574.77	31157.1	23786.2
	1573.15	31173.1	23843.8
	1571.52	31228.5	24055.9
	1569.9	31312.9	24109.1
	1568.27	31422.5	24242.7
	1566.64	31482.7	24303.1
	1565.02	31670.3	24432
	1563.39	31800.8	24537.3
	1561.76	31722	24689.6
	1560.13	32027.7	24844.8
	1558.51	32090.8	24859.3
	1556.88	32187.1	25091.9
	1555.25	32390.2	25133.5
	1553.62	32441	25388.9
	1551.99	32549.6	25339.9
	1550.36	32705.9	25472.4
	1548.73	32725.1	25528.2
	1547.1	32776.7	25644.4
	1545.47	32799	25651.3
	1543.84	32858.9	25711.8
	1542.2	32756.8	25677.3
	1540.57	32803.4	25643.4
	1538.94	32867.8	25637.9
	1537.31	32853.4	25573.2
	1535.68	32790.6	25594.8
	1534.04	32810.2	25630.1
	1532.41	32900.7	25606.9
	1530.78	32970.3	25740.6
	1529.14	32989.1	25677.6
	1527.51	33061.9	25820.5
	1525.87	33183.6	25943
	1524.23	33322.7	26082
	1522.6	33429.5	26165.7
	1520.96	33527.1	26335.5
	1519.33	33709.5	26524.6
	1517.69	33823.1	26752.2
	1516.05	34022.1	26988.2
	1514.42	34341	27238.3
	1512.78	34507.2	27425
	1511.14	34618.9	27740.4
	1509.5	34874.6	27936.5
	1507.86	35018.8	28202
	1506.22	35290.1	28381.3
	1504.58	35442	28533.1
	1502.94	35426	28614.4
	1501.3	35557.6	28666.8
	1499.66	35438.1	28531.4
	1498.02	35499.8	28490.4
	1496.38	35426.5	28319.9
	1494.74	35304.6	28162.6
	1493.1	35265.9	28023.5
	1491.45	35018.3	27908.7
	1489.81	34962.7	27710.4
	1488.17	34796.9	27580.2
	1486.53	34618.2	27462.1
	1484.88	34570.1	27377.6
	1483.24	34382.6	27116
	1481.59	34097.2	26968.1
	1479.95	33907.3	26812.8
	1478.3	33783.1	26727.4
	1476.66	33699.1	26487.3
	1475.01	33579.2	26441.6
	1473.37	33543.8	26422.4
	1471.72	33535.9	26360.9
	1470.07	33547.3	26379
	1468.43	33651	26421.1
	1466.78	33821.6	26484.6
	1465.13	33919	26666.7
	1463.48	34261.4	26940.6
	1461.83	34445.2	27057.7
	1460.19	34654.5	27276
	1458.54	34811.7	27381.6
	1456.89	34917.5	27590.3
	1455.24	34874.1	27716.3
	1453.59	34871.4	27824.6
	1451.94	34786.9	27764.2
	1450.29	34615.4	27787.8
	1448.63	34582.9	27630.3
	1446.98	34423	27565.6
	1445.33	34344.5	27425.4
	1443.68	34322.9	27256.1
	1442.02	34184.5	27229.9
	1440.37	34022.5	27047.4
	1438.72	33959.2	26896.9
	1437.06	33932.7	26779.6
	1435.41	33922.4	26728.5
	1433.76	33883.4	26631.3
	1432.1	33777.1	26578.5
	1430.44	33677	26538.9
	1428.79	33828.2	26473.7
	1427.13	33851.3	26338.3
	1425.48	33779.8	26433.5
	1423.82	33762.4	26386.4
	1422.16	33798.4	26386.2
	1420.51	33831.7	26361.4
	1418.85	33824.1	26308.1
	1417.19	33866.7	26320.3
	1415.53	33805.7	26324.7
	1413.88	33808.9	26188.8
	1412.22	33760.2	26218.5
	1410.56	33738.1	26197.4
	1408.9	33814.9	26229
	1407.24	33742.6	26227.1
	1405.58	33746	26085.2
	1403.92	33793.4	26136.6
	1402.26	33865.5	26257
	1400.59	33880.6	26147.5
	1398.93	33848	26171.6
	1397.27	33846.7	26258.8
	1395.61	33834.6	26254
	1393.94	33836.8	26173.6
	1392.28	33789.9	26191.1
	1390.62	33852.4	26123.3
	1388.95	33770.5	26079.5
	1387.29	33781.2	26035.4
	1385.62	33643.8	26085
	1383.96	33690.9	26016.6
	1382.3	33618.3	26010.8
	1380.63	33689.8	25982.9
	1378.96	33639.2	26053.7
	1377.3	33647.5	25956
	1375.63	33559.1	25991
	1373.96	33560.5	25980.2
	1372.3	33619.9	25962.6
	1370.63	33582	25926.3
	1368.96	33545.5	25968.3
	1367.29	33659.4	26014.6
	1365.62	33738.5	25880.5
	1363.95	33615.2	25934.3
	1362.29	33671.4	25994
	1360.62	33724.2	25871.1
	1358.94	33709.3	25940.4
	1357.27	33746.9	25977.8
	1355.6	33823.2	25916
	1353.93	33927.5	25948.2
	1352.26	33899.1	26070.8
	1350.59	34007.4	26171.2
	1348.92	34209.1	26281.3
	1347.24	34298.3	26431.3
	1345.57	34540.2	26795.4
	1343.9	34803.2	26973.5
	1342.22	35091	27257.2
	1340.55	35429.4	27792.5
	1338.88	35583.4	28116
	1337.2	35926.2	28417.4
	1335.52	36102.7	28634.5
	1333.85	36191.8	28819.7
	1332.17	36236.3	28801.9
	1330.5	36233.3	28963.3
	1328.82	36205.4	28942.1
	1327.14	36162.6	28917.2
	1325.46	36128.9	28840.4
	1323.79	35932.1	28784.3
	1322.11	35897.9	28590.6
	1320.43	35784.6	28523.7
	1318.75	35603.4	28339.1
	1317.07	35637.1	28326.4
	1315.39	35402.1	28231.5
	1313.71	35409	27995.1
	1312.04	35345.2	27904.3
	1310.35	35140.7	27886.7
	1308.67	35204.6	27690.3
	1306.99	35072.6	27595.2
	1305.31	34993.5	27544.8
	1303.63	34992.2	27517.3
	1301.95	34947.5	27472.4
	1300.26	34816.3	27504.2
	1298.58	34763.8	27215.5
	1296.9	34761.2	27189.3
	1295.21	34668.9	27039.3
	1293.53	34558.1	26930.8
	1291.85	34466.4	26681.6
	1290.16	34326.5	26621.5
	1288.47	34153	26403.5
	1286.79	34074.4	26275.5
	1285.1	34097.2	26218.1
	1283.42	34033.4	26218.8
	1281.73	34019	26208.7
	1280.05	33968.2	26206
	1278.36	33924.9	26212.7
	1276.67	33964.3	26213.5
	1274.98	33908.4	26205.5
	1273.29	33749.1	26138.4
	1271.61	33691.3	26040.6
	1269.92	33520	25962.8
	1268.23	33433.3	25669
	1266.54	33250.3	25507.6
	1264.85	33213	25386.4
	1263.16	33066.2	25214.5
	1261.46	33069.4	25143.3
	1259.77	33023	25064.7
	1258.08	32879.8	25013
	1256.39	32939.5	24945.2
	1254.7	32956.8	24934.4
	1253.01	32980.9	24832.6
	1251.31	33029.9	24917.6
	1249.62	32925	24880.5
	1247.93	33088.6	24835.7
	1246.23	32877.5	24846.2
	1244.54	32909.8	24799.4
	1242.84	32846.4	24690.8
	1241.15	32807.2	24645.8
	1239.45	32732.8	24579.9
	1237.76	32786.5	24422.8
	1236.06	32733.3	24409.2
	1234.36	32550.3	24233
	1232.67	32528.5	24170.7
	1230.97	32419	24150.3
	1229.27	32329.1	24079.3
	1227.57	32320.3	23963.9
	1225.87	32264.8	23928
	1224.18	32253.2	23849.2
	1222.48	32196.1	23779.1
	1220.78	32095.1	23768.3
	1219.08	32067.8	23742.8
	1217.38	31997.2	23729.8
	1215.68	32043.2	23664.8
	1213.97	31955.9	23631.1
	1212.27	31923.3	23636.8
	1210.57	31948.3	23510
	1208.87	31839.8	23549.1
	1207.17	31813.2	23434.3
	1205.46	31839.1	23410.8
	1203.76	31828	23443.2
	1202.06	31778.5	23371
	1200.35	31697.5	23377.8
	1198.65	31694.9	23413.7
	1196.94	31648.7	23407.8
	1195.24	31615.3	23344
	1193.54	31576.5	23401.9
	1191.83	31594.8	23311.8
	1190.12	31507.4	23433.4
	1188.42	31580.5	23510
	1186.71	31528.8	23527.7
	1185	31461.9	23630.2
	1183.3	31510.6	23688.3
	1181.59	31532.6	23754.2
	1179.88	31548.3	23851.4
	1178.17	31635.8	23766.4
	1176.46	31657.2	24013.8
	1174.75	31642.5	23894.6
	1173.04	31676	23943.8
	1171.33	31731.7	23944.2
	1169.62	31593.9	23874.3
	1167.91	31477.4	23705.8
	1166.2	31340.3	23405.5
	1164.49	31193.9	23148
	1162.78	31039.8	22880.2
	1161.07	30776.9	22565.9
	1159.35	30548.3	22275.9
	1157.64	30278.5	22106.4
	1155.93	30189.8	21829.7
	1154.21	30030.2	21664.2
	1152.5	29974.5	21609.3
	1150.79	29818.7	21333.6
	1149.07	29645.3	21254.2
	1147.36	29553.6	21086.1
	1145.64	29474	20940.2
	1143.92	29377.3	20948.8
	1142.21	29241.7	20774.6
	1140.49	29231.9	20660.5
	1138.77	29058.8	20604.7
	1137.06	29017.4	20470.4
	1135.34	29049.7	20394.2
	1133.62	28880	20287
	1131.9	28814.2	20222.7
	1130.18	28709.9	20140.2
	1128.46	28734	20094.4
	1126.74	28605.2	20004.8
	1125.03	28658.9	19932.9
	1123.31	28500.2	19909.8
	1121.58	28385	19917.6
	1119.86	28356.3	19702.6
	1118.14	28292.6	19705.6
	1116.42	28249.1	19599.6
	1114.7	28200	19499.1
	1112.97	28132	19474.3
	1111.25	28065.5	19363.4
	1109.53	28021.5	19259.1
	1107.81	27928.6	19247.4
	1106.08	27859.6	19155.8
	1104.36	27842.8	19080.5
	1102.63	27745.6	18990.3
	1100.91	27731.5	18929.3
	1099.18	27613.8	18898.7
	1097.45	27610	18776.7
	1095.73	27483.2	18681.6
	1094	27466.8	18678.5
	1092.28	27337.9	18518.1
	1090.55	27321.3	18423.4
	1088.82	27323.3	18413.3
	1087.09	27241.8	18297.2
	1085.37	27079.4	18214.9
	1083.64	26955	18123.7
	1081.91	26906	17985
	1080.18	26862.9	17892.6
	1078.45	26804.1	17798.5
	1076.72	26640.3	17694.3
	1074.99	26547.2	17622.2
	1073.26	26424.2	17521.1
	1071.52	26382.3	17462.3
	1069.79	26303.9	17362.4
	1068.06	26246.5	17241.5
	1066.33	26151	17153.1
	1064.6	26006.7	16978.6
	1062.86	26047.3	16986.8
	1061.13	25854.1	16902.2
	1059.39	25795.6	16814.5
	1057.66	25697.7	16729.5
	1055.93	25595.1	16645.8
	1054.19	25547	16518.1
	1052.45	25439.3	16413
	1050.72	25340	16326.3
	1048.98	25355.6	16269.1
	1047.25	25243.7	16277.4
	1045.51	25217.4	16133.6
	1043.77	25032.3	15946.8
	1042.03	24936.7	15919.9
	1040.3	24883.3	15823
	1038.56	24850.1	15750
	1036.82	24785	15679.5
	1035.08	24730	15570.9
	1033.34	24652.7	15484.6
	1031.6	24530.7	15474.5
	1029.86	24461.2	15344.8
	1028.12	24456.4	15268.4
	1026.38	24420.7	15238.5
	1024.64	24391.1	15120.4
	1022.89	24355.5	15101.4
	1021.15	24294.2	15077.2
	1019.41	24269.9	15014.9
	1017.67	24241.9	14978
	1015.92	24177.1	14945.9
	1014.18	24171.3	14968.7
	1012.44	24221.4	14853.9
	1010.69	24085.9	14824
	1008.95	24065	14890.8
	1007.2	24082.9	14824.4
	1005.46	23998.3	14710.3
	1003.71	23870.1	14616.1
	1001.97	23833.6	14605.7
	1000.22	23791.2	14613.1
	998.471	23610.7	14465.2
	996.723	23562.7	14455.2
	994.975	23412.1	14324.4
	993.227	23317.5	14270.7
	991.479	23225.6	14129.4
	989.729	23128.8	14032.2
	987.981	23007.7	13925
	986.231	22929.2	13820.8
	984.481	22835.2	13743.2
	982.731	22778.9	13638.6
	980.979	22709.8	13573.8
	979.229	22578.7	13432
	977.477	22427.9	13299.9
	975.725	22386.7	13342.5
	973.973	22320.7	13253.9
	972.219	22215.3	13186.6
	970.467	22064.6	13167.1
	968.713	21943.5	13146.5
	966.959	21883.4	12954.7
	965.205	21820.7	12942.3
	963.449	21835.8	12916.7
	961.695	21566.2	12840.2
	959.939	21628.1	12877.3
	958.184	21551.5	12821.9
	956.428	21386.7	12772.2
	954.672	21299.6	12669.4
	952.914	21184.3	12540.1
	951.158	20964.3	12481.9
	949.4	20908.5	12352
	947.643	20875	12290.6
	945.883	20624	12174.3
	944.125	20553.7	11997.2
	942.365	20389.6	11852
	940.606	20288.7	11744.2
	938.846	20108.7	11616.3
	937.086	20115.5	11528.6
	935.324	20003.2	11480.8
	933.564	19883.6	11394.3
	931.803	19812	11274.1
	930.041	19731.3	11261.7
	928.279	19528.7	11198.1
	926.516	19560.5	11136.5
	924.754	19444.6	10991.2
	922.99	19369.5	10968.6
	921.227	19232.1	10864.8
	919.463	19215.8	10806.7
	917.697	19104.8	10721.2
	915.934	19083.4	10638.2
	914.168	18941.4	10587.3
	912.402	18895.1	10535.9
	910.637	18776.3	10446.6
	908.869	18698.4	10322.4
	907.104	18639.5	10295.1
	905.336	18523.7	10244.2
	903.568	18408.2	10149.3
	901.801	18374.3	10128.8
	900.031	18307.9	10001.7
	898.264	18143.7	9957.99
	896.494	18029.2	9940.56
	894.725	17926.9	9816.57
	892.955	17885.5	9720.84
	891.186	17770.5	9731.04
	889.414	17630.8	9574.85
	887.643	17545.2	9583.69
	885.871	17500.2	9493.73
	884.1	17405.4	9408.18
	882.328	17285.6	9344.08
	880.557	17115.8	9221.43
	878.783	17044.5	9202.06
	877.01	16919.4	9074.12
	875.236	16858.8	9054.66
	873.461	16743.4	9001.95
	871.688	16618.5	8834.5
	869.912	16435.1	8833.6
	868.137	16318	8780.59
	866.361	16289.8	8637.66
	864.586	16178.9	8647.79
	862.811	16114.8	8551.78
	861.033	15962.4	8461.17
	859.256	15889.4	8395.07
	857.479	15822.8	8353.58
	855.701	15675.8	8240.61
	853.922	15540.7	8185.7
	852.144	15446	8143.65
	850.365	15330.7	8089.03
	848.586	15237.4	8000.4
	846.805	15189.8	7946.08
	845.025	15084.6	7901.75
	843.244	15016.8	7793.41
	841.463	14897.4	7727.22
	839.682	14869.4	7737.13
	837.9	14795.4	7642.34
	836.119	14681.2	7601.6
	834.336	14631.3	7547.95
	832.553	14581.8	7519.94
	830.769	14511.7	7512.47
	828.986	14415	7396.68
	827.201	14305.3	7321.23
	825.418	14280.7	7352.34
	823.633	14147.9	7265.74
	821.848	14102.7	7207.14
	820.062	14059	7144.46
	818.275	13984.4	7124.78
	816.49	13806.5	7085.62
	814.703	13740.5	6993.71
	812.916	13739.7	6975.19
	811.129	13580	6879.62
	809.34	13622.9	6844.75
	807.553	13465	6803.33
	805.764	13456.2	6754.61
	803.975	13372.6	6743.72
	802.186	13270.8	6649.04
	800.394	13127	6612.4
	798.606	13148.5	6559.18
	796.814	13028	6553.17
	795.023	12928.4	6508.4
	793.232	12872.8	6511.44
	791.439	12874.2	6441.45
	789.648	12802.7	6437.94
	787.856	12693.1	6467.23
	786.062	12674.8	6469.78
	784.268	12628.6	6443.14
	782.475	12498.3	6405.75
	780.68	12428.3	6374.07
	778.887	12432.6	6305.69
	777.092	12321.2	6249.57
	775.295	12223.6	6233.01
	773.5	12086	6154.33
	771.703	11979.7	6100.25
	769.908	11878.9	6085.34
	768.111	11792.6	6044.14
	766.312	11779.2	6003.33
	764.516	11680.9	5949.58
	762.717	11589.4	5854.03
	760.92	11493.6	5760.25
	759.121	11417.8	5646.91
	757.32	11271.6	5572.94
	755.521	11133.3	5476.44
	753.721	11107.5	5357.81
	751.922	11011.3	5281.61
	750.121	10871.4	5243.37
	748.318	10838	5216.24
	746.518	10717.4	5131.38
	744.715	10701.7	5056.4
	742.912	10601.1	5070.79
	741.109	10594	5004.96
	739.307	10473.5	4938.91
	737.504	10424.1	4894.53
	735.699	10356.3	4824.6
	733.894	10298.3	4794.04
	732.09	10163.7	4726.86
	730.285	10218.2	4680.11
	728.481	10094.1	4625.76
	726.674	10070.5	4621.43
	724.867	9968.35	4563.8
	723.061	9921.85	4567.46
	721.254	9855.37	4516.5
	719.447	9799.59	4484.45
	717.639	9781.14	4407.76
	715.83	9682.09	4385.81
	714.021	9655.7	4359.7
	712.213	9633.36	4307.49
	710.402	9575.85	4281.41
	708.594	9480.37	4264.65
	706.783	9442.02	4250.35
	704.973	9401.98	4231.16
	703.162	9308.93	4170.21
	701.35	9320.73	4202.47
	699.537	9238.38	4199.7
	697.727	9287.03	4306.23
	695.914	9230.91	4287.78
	694.1	9199.77	4274.71
	692.287	9103.57	4270.59
	690.473	9040.55	4161.78
	688.658	8968.02	4109.01
	686.844	8866.67	3985.13
	685.029	8769.28	3929.61
	683.213	8625.38	3905.16
	681.398	8632.28	3898.55
	679.582	8566.27	3903.54
	677.766	8529.22	3892.78
	675.947	8547.12	3899.36
	674.131	8417.33	3994.17
	672.312	8445.38	3961.68
	670.494	8362.15	3901.14
	668.676	8270.66	3875.39
	666.857	8202.5	3754.89
	665.037	8085.85	3677.73
	663.219	7966.08	3647.9
	661.398	7910.34	3600.53
	659.578	7927.35	3606.67
	657.756	7849.84	3530.7
	655.936	7759.45	3505.19
	654.113	7725.35	3458.74
	652.291	7649.14	3426.56
	650.469	7596.95	3360.07
	648.646	7555.11	3330.47
	646.822	7550.77	3256
	644.998	7484.15	3260.98
	643.174	7483.71	3291.86
	641.35	7331.67	3248.81
	639.525	7328.59	3186.09
	637.699	7320.16	3119.63
	635.873	7201.78	3104.34
	634.047	7134.84	3023.84
	632.221	7163.61	2979.68
	630.394	7045.35	2925.7
	628.566	6981.39	2918.48
	626.738	6914.55	2868.06
	624.91	6900.64	2858.06
	623.082	6869.26	2825.63
	621.254	6870.4	2962.88
	619.424	6901.73	2959.41
	617.594	6906.86	3048.08
	615.764	6858.18	3098.53
	613.934	6852.05	3093.47
	612.104	6797.46	3054.96
	610.271	6672.16	2976.63
	608.439	6567.62	2863.34
	606.607	6463.61	2758.81
	604.775	6379.98	2650.81
	602.941	6312.12	2653.59
	601.109	6231.1	2635.56
	599.275	6122.66	2670.51
	597.441	6095.65	2617.78
	595.606	5983.05	2479.82
	593.771	5934.56	2292.61
	591.936	5783.74	2141.38
	590.1	5728.91	1985.86
	588.264	5645.84	1946.01
	586.428	5575.97	1881.42
	584.59	5520.62	1891.24
	582.752	5483.52	1843.23
	580.914	5453.44	1823.48
	579.076	5424.34	1766.46
	577.238	5355.07	1732.98
	575.398	5310.68	1789.38
	573.559	5258.72	1719.26
	571.721	5221.6	1712.09
	569.879	5198.84	1666.85
	568.039	5130.78	1647.29
	566.197	5091.91	1627.13
	564.356	5031.49	1610.36
	562.514	5010.36	1624.66
	560.672	4952.39	1581.77
	558.83	4909.61	1570.55
	556.986	4878.53	1565
	555.143	4825.32	1546.93
	553.299	4833.36	1568.09
	551.455	4856.44	1514.43
	549.609	4761.78	1540.75
	547.766	4767.67	1517.78
	545.92	4673.55	1459.96
	544.074	4612.88	1434.24
	542.227	4561.97	1419.6
	540.381	4529.57	1405.67
	538.533	4451.8	1367.98
	536.686	4472.51	1317.7
	534.838	4369.1	1270.2
	532.99	4318.05	1209.88
	531.141	4309.26	1157.38
	529.293	4223.58	1131.06
	527.443	4193.7	1045.02
	525.592	4101.01	1066.69
	523.742	4031.61	1017.87
	521.891	4005.15	994.238
	520.041	3941.56	993.14
	518.189	3911.3	1000.67
	516.336	3890.15	990.586
	514.484	3862.54	1029
	512.631	3774.73	1028.26
	510.777	3773.37	1111.89
	508.924	3831.6	1130.39
	507.07	3807.5	1206.43
	505.217	3807.45	1289.73
	503.361	3807.28	1395.47
	501.506	3797.54	1484.43
	499.65	3797.37	1527.09
	497.795	3774.5	1539.98
	495.938	3790.46	1527.53
	494.08	3689.71	1512.33
	492.223	3677.26	1472.07
	490.365	3580.64	1400.89
	488.508	3582.78	1297.88
	486.648	3454.47	1198.85
	484.789	3366.08	1110.48
	482.93	3322.34	1006.05
	481.07	3259.29	919.193
	479.211	3172.54	847.4
	477.35	3157.48	742.973
	475.488	3069.84	687.102
	473.627	3048.37	680.469
	471.766	2992.6	664.903
	469.904	2999.75	658.396
	468.041	2926.39	700.478
	466.178	2965.09	747.303
	464.315	2898.2	778.276
	462.451	2847.04	785.672
	460.586	2826.13	813.648
	458.721	2791.78	742.049
	456.856	2675.15	638.37
	454.99	2621.47	548.173
	453.125	2583.98	470.973
	451.258	2565.64	367.779
	449.393	2483.5	349.943
	447.525	2448.68	315.366
	445.656	2411.97	314.651
	443.789	2361.03	254.685
	441.92	2351.18	231.191
	440.051	2303.72	235.717
	438.182	2279.29	213.067
	436.312	2257.37	190.902
	434.443	2187.3	145.854
	432.572	2163.51	135.571
	430.701	2052.35	85.813
	428.83	2002.52	62.864
	426.959	1938.96	12.432
	425.086	1894.87	-36.793
	423.213	1851.26	-22.98
	421.34	1796.31	-80.466
	419.467	1727.41	-129.875
	417.594	1701.63	-140.318
	415.719	1651.71	-179.16
	413.844	1657.55	-202.367
	411.969	1625.88	-205.926
	410.094	1596.36	-192.217
	408.219	1563.65	-231.487
	406.342	1545.15	-208.676
	404.465	1560.69	-215.541
	402.588	1576.34	-177.265
	400.711	1556.08	-193.231
	398.832	1505.22	-143.402
	396.953	1493.6	-160.904
	395.074	1495.67	-164.35
	393.195	1460.57	-181.605
	391.316	1392.2	-220.093
	389.435	1356.77	-221.991
	387.557	1269.23	-255.264
	385.676	1247.64	-245.95
	383.793	1231.84	-243.596
	381.912	1213.22	-234.29
	380.029	1146.65	-244.904
	378.147	1157.74	-265.53
	376.264	1097.8	-305.818
	374.381	1019.04	-353.745
	372.498	1013.8	-389.169
	370.613	947.098	-411.51
	368.728	929.272	-477.389
	366.844	860.974	-520.529
	364.957	872.349	-554.122
	363.072	787.391	-581.583
	361.185	759.737	-613.854
	359.299	735.034	-606.491
	357.412	716.454	-654.492
	355.523	650.053	-666.632
	353.637	619.163	-662.435
	351.748	587.933	-687.841
	349.859	592.886	-690.335
	347.969	568.838	-675.571
	346.08	539.047	-651.305
	344.19	593.648	-636.673
	342.299	545.209	-625.215
	340.408	481.189	-589.834
	338.518	514.89	-572.998
	336.625	452.312	-568.715
	334.732	401.717	-559.16
	332.84	427.091	-572.111
	330.947	378.048	-603.805
	329.055	316.491	-646.144
	327.16	268.898	-684.367
	325.266	272.613	-708.755
	323.371	226.222	-699.182
	321.477	196.704	-712.086
	319.58	221.379	-728.028
	317.685	155.373	-741.739
	315.789	162.032	-699.068
	313.891	136.763	-725.76
	311.994	84.849	-727.89
	310.096	80.531	-717.277
	308.199	35.662	-733.197
	306.301	-10.822	-750.279
	304.4	-15.118	-776.815
	302.502	-5.281	-790.609
	300.602	-66.087	-800.779
	298.701	-70.019	-824.718
	296.801	-94.139	-840.828
	294.9	-104.948	-854.83
	292.998	-114.702	-854.129
	291.096	-139.265	-856.11
	289.193	-133.5	-861.589
	287.291	-137.064	-864.734
	285.389	-150.417	-847.481
	283.484	-142.674	-842.821
	281.58	-125.15	-825
	279.676	-127.084	-824.54
	277.772	-122.263	-783.209
	275.867	-102.428	-789.861
	273.961	-121.011	-782.427
	272.055	-75.934	-754.748
	270.148	-49.724	-732.317
	268.24	-37.601	-716.643
	266.334	17.776	-691.789
	264.426	4.183	-653.577
	262.518	64.291	-624.68
	260.609	107.986	-628.801
	258.699	155.612	-582.03
	256.791	180.215	-571.639
	254.881	267.753	-537.33
	252.969	364.307	-534.849
	251.059	427.618	-540.96
	249.148	478.714	-520.143
	247.236	499.039	-539.83
	245.324	528.866	-549.648
	243.412	530.845	-573.844
	241.498	577.233	-595.478
	239.586	591.952	-615.132
	237.672	602.375	-600.818
	235.758	571.31	-579.558
	233.842	600.616	-580.436
	231.928	605.817	-571.005
	230.012	528.914	-577.79
	228.096	478.674	-546.136
	226.18	448.016	-577.925
	224.262	429.637	-588.639
	222.346	363.948	-600.159
	220.428	318.876	-614.449
	218.51	257.172	-617.632
	216.592	254.806	-632.722
	214.672	153.841	-652.198
	212.752	148.957	-631.911
	210.834	70.013	-603.662
	208.912	83.052	-611.118
	206.992	38.688	-600.903
	205.07	-1.731	-623.714
	203.15	-16.275	-589.836
	201.228	-55.164	-579.863
	199.305	-72.459	-572.203
	197.383	-106.013	-549.896
	195.459	-106.452	-503.84
	193.535	-120.267	-458.036
	191.611	-120.126	-452.256
	189.688	-130.705	-395.42
	187.762	-158.795	-367.071
	185.836	-194.706	-385.509
	183.91	-224.727	-370.766
	181.984	-216.851	-389.079
	180.059	-269.65	-402.434
	178.131	-285.478	-441.681
	176.203	-302.106	-442.936
	174.275	-376.251	-473.988
	172.348	-344.197	-451.541
	170.418	-365.746	-462.223
	168.488	-336.353	-478.994
	166.559	-362.608	-475.068
	164.629	-382.187	-464.823
	162.697	-367.174	-486.639
	160.768	-367.101	-480.072
	158.836	-349.801	-462.025
	156.904	-330.558	-448.464
	154.971	-326.362	-461.54
	153.039	-344.203	-439.952
	151.106	-324.746	-461.516
	149.172	-329.962	-465.29
	147.238	-313.271	-449.45
	145.303	-336.261	-451.391
	143.369	-342.732	-435.333
	141.434	-381.178	-416.073
	139.498	-354.523	-418.594
	137.56	-364.081	-414.698
	135.625	-369.627	-393.739
	133.688	-363.948	-409.203
	131.75	-372.239	-379.897
	129.812	-353.858	-385.63
	127.873	-376.452	-367.443
	125.936	-333.483	-359.218
	123.996	-366.481	-342.876
	122.057	-346.177	-329.629
	120.115	-299.928	-336.283
	118.176	-216.324	-260.748
	116.234	-64.764	-236.559
	114.293	-212.61	-186.217
	112.352	-145.417	-179.876
	110.408	-124.506	-110.042
	108.467	-111.712	-95.271
	106.523	-85.567	-71.376
	104.58	-5.113	-33.341
	102.635	0	0

## Sheet: Figure S6
Diameter (nm)
69.3
60.4
72.2

[truncated: 2 more sheets: Figure S7, Figure S9]
