# Supplementary material for: Selective detection of membrane-bound amyloid-β oligomers using SERS “hot-spots”: toward early diagnostics for Alzheimer's disease
Source: Royal Society of Chemistry journal article supplement (doi:10.1039/d5nr03999a), 2026-01-01
Supplement: d5nr03999a2.pdf [file d5nr03999a2.pdf]

Selective Detection of Membrane-Bound Amyloid- $\beta$  Oligomers Using SERS “Hot-Spots”: Toward Early  
Diagnostics of Alzheimer’s Disease

Supporting Information

Abhirami Ajith,<sup>1,†</sup> Sudhanshu Mani Tripathi,<sup>1,†</sup> Poornendhu Jayasree,<sup>1,†</sup> Harikrishnan K Surendran,<sup>1</sup>  
Mekhla Chowdhury,<sup>1</sup> Atasi Ghanti,<sup>1</sup> Chandrabhas Narayana,<sup>1,2,\*</sup> Debanjan Bhowmik<sup>1,\*</sup>

<sup>1</sup>BRIC-Rajiv Gandhi Centre for Biotechnology, Thiruvananthapuram 695014, Kerala, India

<sup>2</sup>Jawaharlal Nehru Centre for Advanced Scientific Research, CPMU, Jakkur, Bengaluru, Karnataka  
560064, India

<sup>†</sup> These authors contributed equally to this work.

\*Corresponding author: [cbhas@rgcb.res.in](mailto:cbhas@rgcb.res.in) and [debanjan@rgcb.res.in](mailto:debanjan@rgcb.res.in).

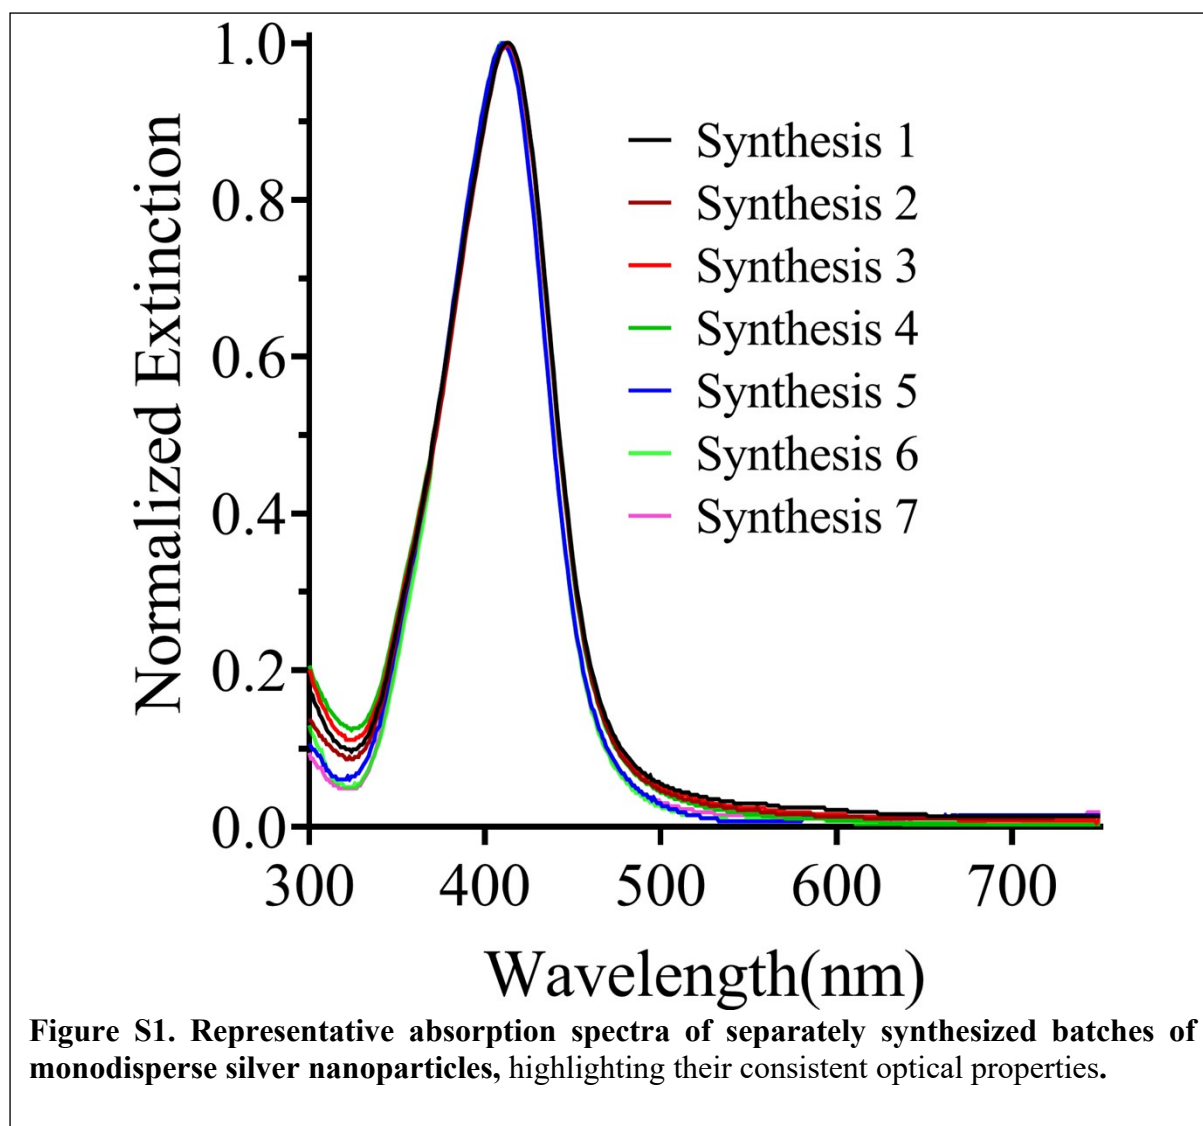

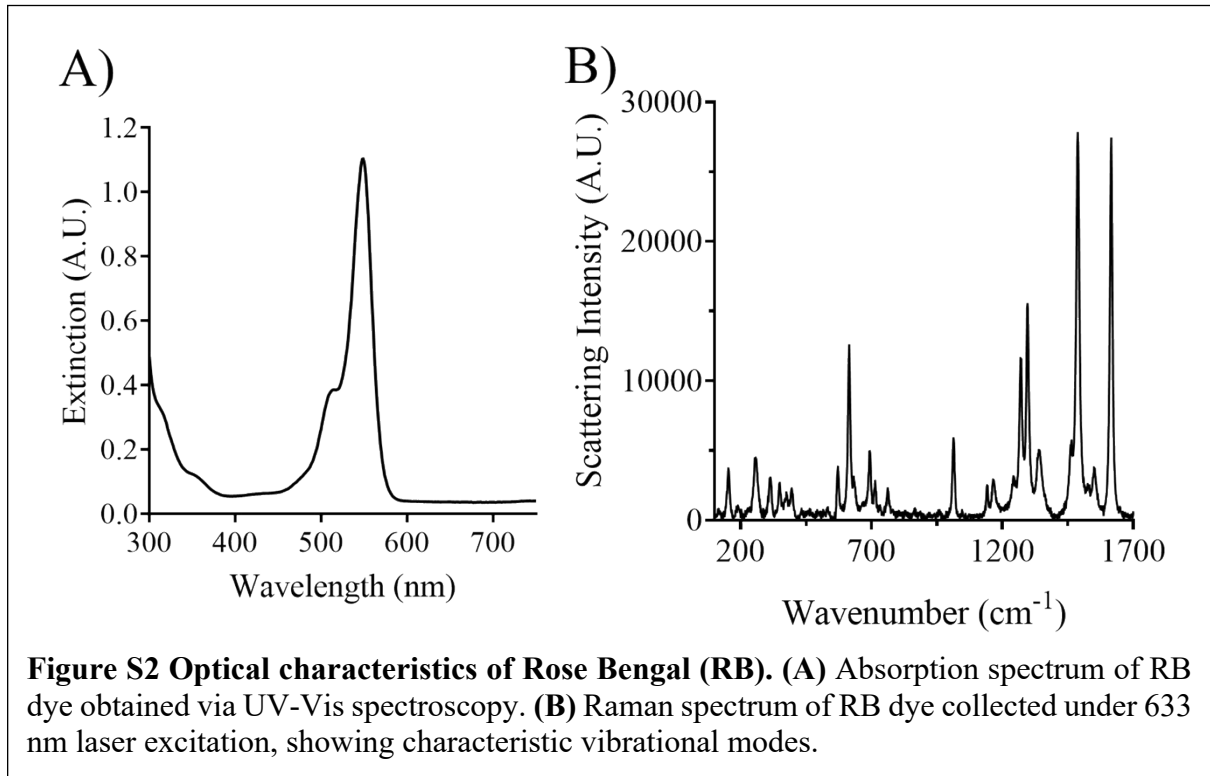

### Loading of Rose Bengal dye on AgNP-construct

In the absorbance spectra of the RB-nanoconstructs, a prominent peak was observed at 550 nm across different activation times. Using Beer-Lambert's Law  $A = \epsilon Cl$ , where  $A$  is absorbance (a unitless measure of light absorbed),  $\epsilon$  is the molar absorptivity or extinction coefficient,  $l$  is the path length or thickness of the absorbing medium in centimeters, and  $C$  is the molar dye concentration; the concentrations of RB were calculated. The resulting concentrations were 314 nM, 68 nM, and 41 nM for constructs activated for 5, 10, and 15 minutes, respectively.

$$C \text{ (5minutes activation)} = \frac{A}{\epsilon l} = \frac{0.030798}{98,000} = 314 \text{ nM}$$

$$C \text{ (10minutes activation)} = \frac{A}{\epsilon l} = \frac{0.006657}{98,000} = 68 \text{ nM}$$

$$C \text{ (15 minutes activation)} = \frac{A}{\epsilon l} = \frac{0.004031}{98,000} = 41 \text{ nM}$$

Using the same Beer-Lambert equation, the concentration of the RB-nanoconstructs was also calculated to be 0.12 nM = 120 pM.

$$\text{Number of RB molecules per AgNP} = \frac{\text{Concentration of RB dye on the construct}}{\text{Concentration of RB - nanoconstruct}},$$

$$\text{RB molecules per AgNP (5 minute activation)} = \frac{314 \text{ nM}}{0.12 \text{ nM}} = 2617$$

$$\text{RB molecules per AgNP (10 minute activation)} = \frac{68 \text{ nM}}{0.12 \text{ nM}} = 567$$

$$RB \text{ molecules per AgNP (15 minute activation)} = \frac{41 \text{ nM}}{0.12 \text{ nM}} = 342$$

**Table S1:** Calculation of loading of Rose Bengal dye molecules on RB-nanoconstruct.

| Activation time | Concentration of RB per 120 pM AgNP | Number of RB per nanoparticle |
|-----------------|-------------------------------------|-------------------------------|
| 5 minutes       | 314 nM                              | 2617                          |
| 10 minutes      | 68 nM                               | 567                           |
| 15 minutes      | 41 nM                               | 342                           |

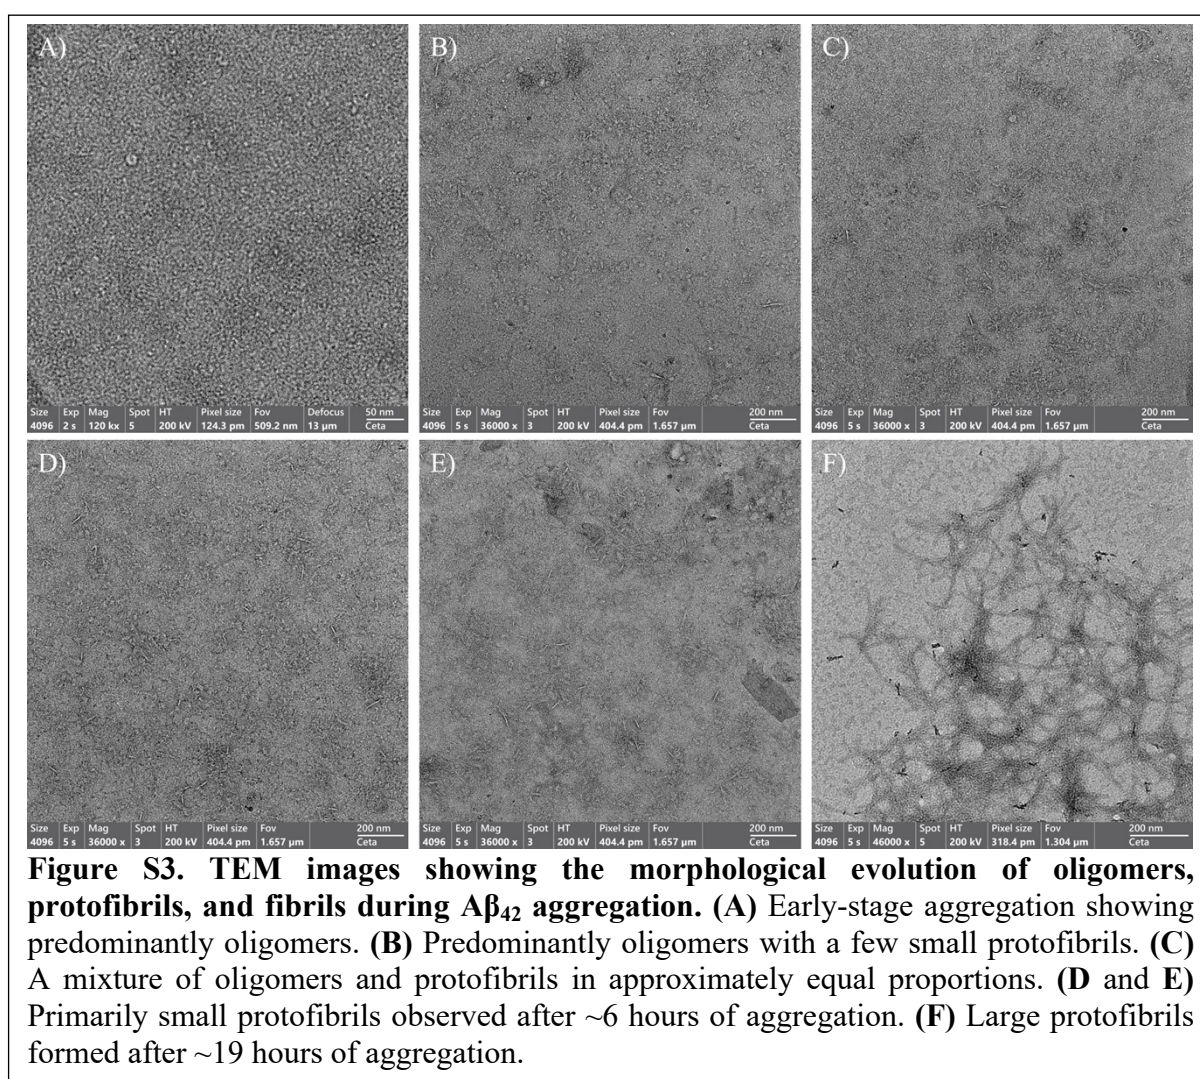

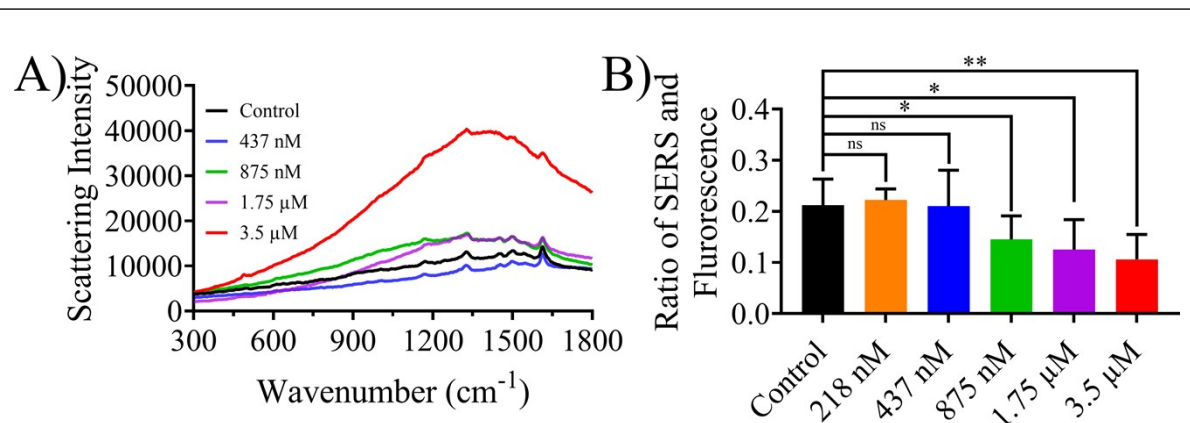

**Figure S4. Probing Small Oligomers of Aβ<sub>42</sub> Using RB-Nanoconstructs.** (A) Representative spectra illustrating the variation in SERS intensity at ~1614 cm<sup>-1</sup> with different concentrations of Aβ<sub>42</sub> oligomers. As the concentration of Aβ<sub>42</sub> decreased from 3.5 μM to 437 nM, the SERS signal at ~1614 cm<sup>-1</sup> increased, while the fluorescence background decreased, indicating reduced interaction between oligomers and the RB-nanoconstructs. (B) Bar graph quantifying the ratio of SERS intensity to fluorescence at ~1614 cm<sup>-1</sup> for varying oligomer concentrations, measured after 1 hour of peptide aggregation. A clear increase in the SERS-to-fluorescence ratio is observed as the concentration of soluble oligomers decreases, consistent with reduced RB displacement from the nanoparticle surface.

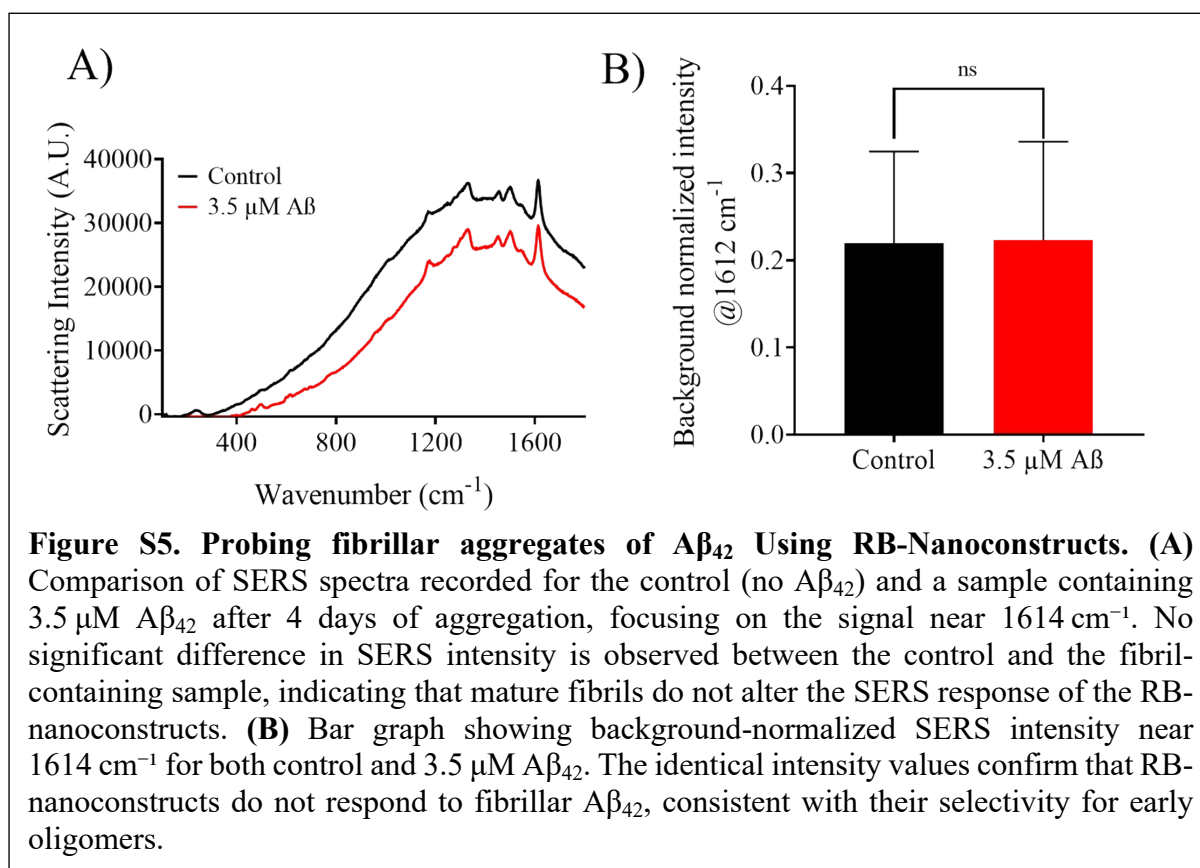

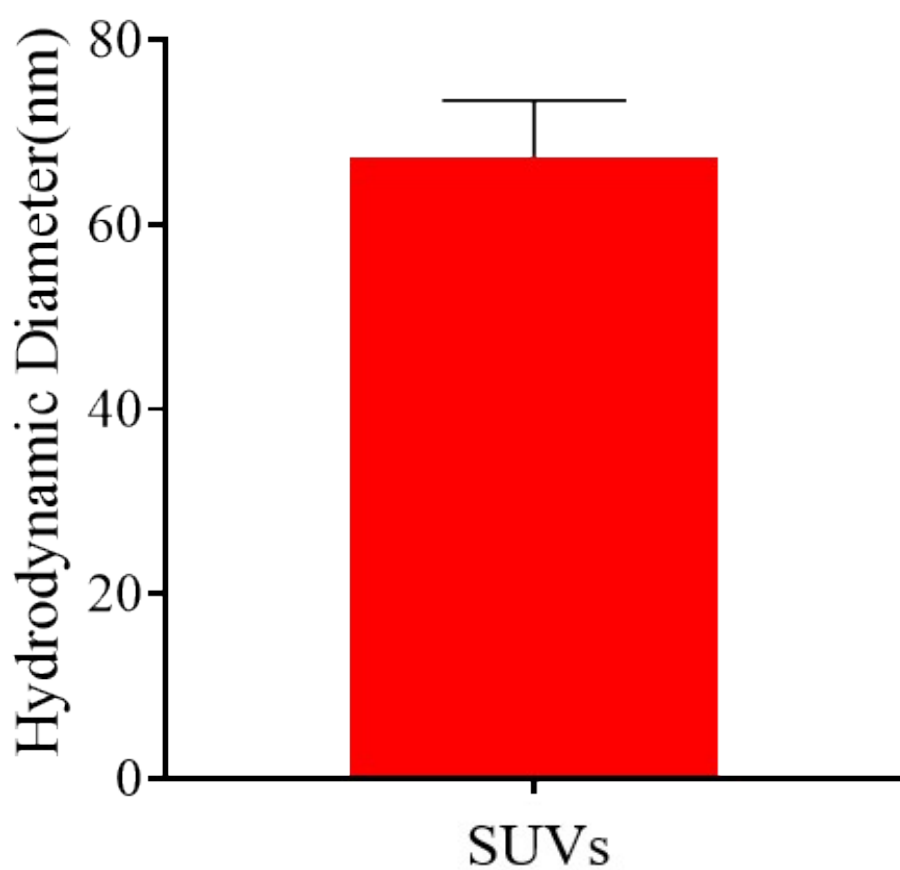

**Figure S6. Hydrodynamic diameter of SUVs ( $67 \pm 6$  nm) measured using Dynamic Light Scattering.**



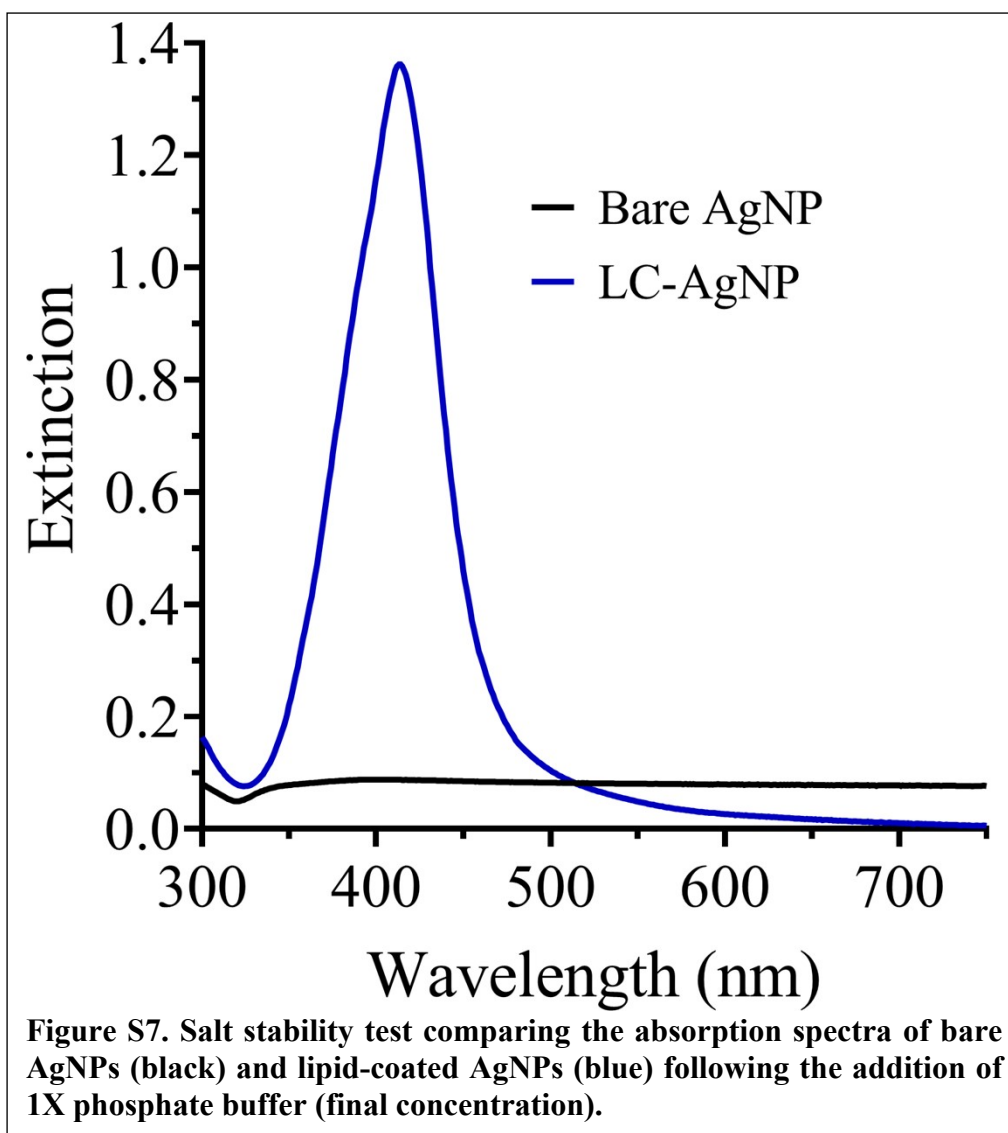

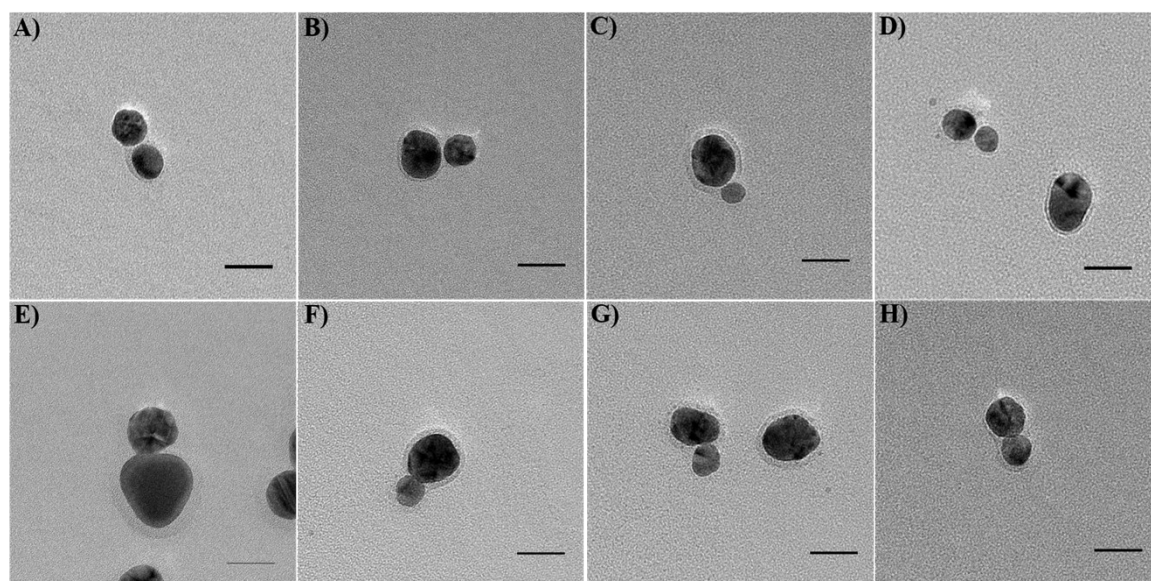

**Figure S8. TEM images showing the formation of SERS “hot spots” during interactions between A $\beta$ -loaded lipid-coated AgNPs (LC-AgNPs) and Rose Bengal-functionalized silver nanoparticles (RB-AgNPs).** Two distinct interaction patterns were observed: separated configurations with a visible interparticle gap (panels A–D) and overlapping configurations (panels E–H). The transparent layer surrounding the AgNPs in the LC-AgNPs (but absent in RB-AgNPs) indicates the presence of a lipid bilayer. Scale bar: 25 nm.

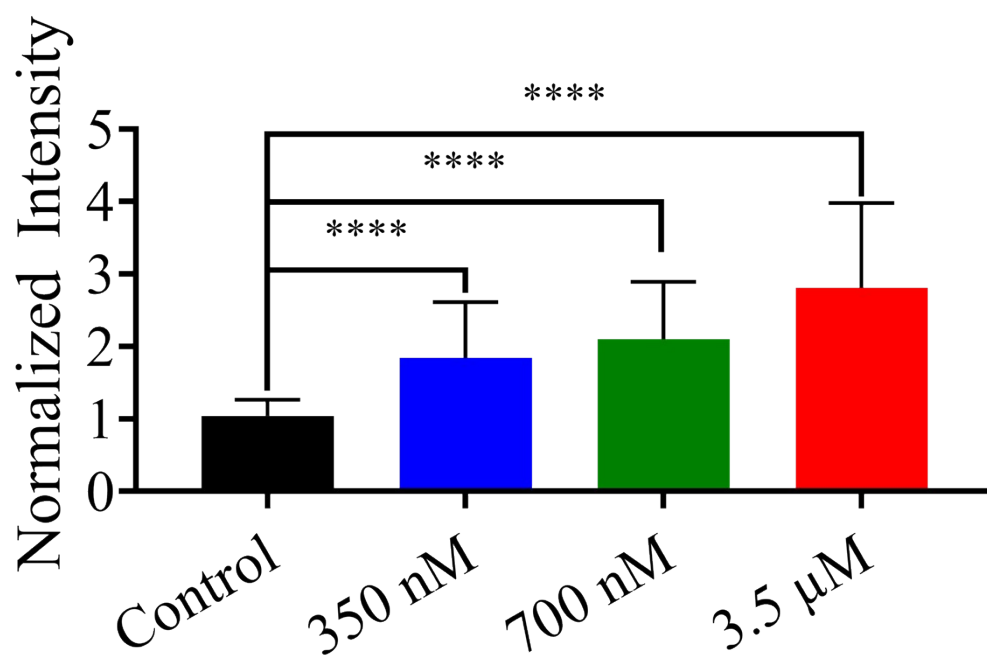

**Figure S9. Increase in the RB-SERS with increasing loading of Aβ<sub>42</sub> oligomers on LC-AgNP.** Bar graph quantifying the normalized SERS intensity of RB for lower concentrations (3.5 μM, 700 nM, 350 nM) of Aβ<sub>42</sub> oligomer at ~1614 cm<sup>-1</sup>.

**Calculation for the number of A $\beta$ <sub>42</sub> being detected:**

The prolate-shaped diffraction-limited spot in our experimental setup has a radius along the z-axis:

$$R_z = \frac{2n\lambda}{N_A^2} = \frac{2 \times 1.33 \times 532}{0.5^2} = 5660 \text{ nm}$$

The radius along the lateral (short) axes is:

$$R_{xy} = \frac{0.61 \times \lambda}{N_A} = \frac{0.61 \times 532 \text{ nm}}{0.5} = 649 \text{ nm}$$

The volume of this diffraction-limited focal region is:

$$V = \frac{4}{3}\pi \times a \times b \times c = \frac{4}{3}\pi \times 649 \times 649 \times 5660 \text{ nm}^3 = 9986066046 \text{ nm}^3$$

$$\text{Now, } 1 \text{ nm}^3 = 10^{-24} \text{ liters} = 10^{-9} \text{ fL}$$

and,

$$V = 9.986 \text{ fL}$$

**Estimating the Number of Particles in the Focal Volume**

For a concentration of **0.3 nM**, the number of particles within this 9.986 fL Volume is calculated as follows:

$$\text{Concentration } C = 0.3 \text{ nM} = 0.3 \times 10^{-9} \text{ mol/L}$$

$$\text{Volume } V = 9.986 \text{ fL} = 9.986 \times 10^{-15} \text{ L}$$

$$\text{Avogadro's number } N_A = 6.022 \times 10^{23} \text{ particles/mol}$$

$$\text{Moles} = C \times V = (0.3 \times 10^{-9}) \times (9.986 \times 10^{-15}) = 2.996 \times 10^{-24} \text{ mol}$$

$$\text{Number of particles} = \text{moles} \times N_A = 2.996 \times 10^{-24} \times 6.022 \times 10^{23} = 18.04 \times 10^{-1} = 1.8$$

Therefore, during a 10-second data acquisition, on average, 1.8 LC-AgNP particles are present in the focal volume. This is equivalent to acquiring data from 1 particle over 18 seconds, assuming linear scaling.

**Diffusion Characteristics of LC-AgNPs**

The diffusion constant D is given by the Stokes-Einstein equation:

$$D = \frac{k_B T}{6\pi\eta r}$$

Where  $k_B$  is the Boltzmann constant =  $1.380649 \times 10^{-23} \text{ J/K}$ ,  $T$  is the absolute temperature (in Kelvin),  $\eta$  is the dynamic viscosity of the fluid (in Pa·s),  $r$  is the radius of the particle (in meters).

$$D = \frac{1.380649 \times 10^{-23} \text{ J K}^{-1} \times 297.15 \text{ K}}{6 \times \pi \times 0.0009107 \text{ Pa.s} \times 23 \times 10^{-9} \text{ m}} = 1.04 \times 10^{-11} \text{ m}^2 \text{ s}^{-1}$$

**Diffusion Time Through Focal Volume**

Using the relation  $\langle r^2 \rangle = 4 \times D \times \tau_D$ , and the lateral radius  $r = 649 \text{ nm}$ :

$$\tau_D = \frac{\langle r^2 \rangle}{4D} = \frac{(649 \times 10^{-9})^2 \text{ m}^2}{4 \times 1.04 \times 10^{-11} \text{ m}^2 \text{ s}^{-1}} = \frac{1.012 \times 10^{-13}}{10^{-11}} \text{ s} = 10.13 \text{ msec}$$

Assuming each LC-AgNP leaves the focal volume after this diffusion time and does not return within the 18-second data acquisition period, the maximum number of distinct LC-AgNPs detected in this time is:

$$\frac{18 \text{ sec}}{10.13 \text{ msec}} = 1777 \text{ particles.}$$

**Signal Scaling with A $\beta$ <sub>42</sub> Concentration**

Therefore, at a sample concentration of 3.5  $\mu\text{M}$   $\text{A}\beta_{42}$ , the data could include signals from up to 1777  $\text{A}\beta_{42}$ -loaded LC-AgNPs. Therefore, at the detection limit of 218 nM  $\text{A}\beta_{42}$ , the number of detected  $\text{A}\beta_{42}$ -loaded LC-AgNPs is:  $(1777 \times 218 \text{ nM} \div 3500 \text{ nM}) = 110$ .

Thus, at our detection limit, an average of 110  $\text{A}\beta_{42}$ -loaded LC-AgNPs contributes to the measured signal during each 10-second.

**Table S2:** Comparison of the our SERS-based detection platform with other reported methods for detecting lipophilic- $\text{A}\beta_{42}$  oligomers.

| Sl. No. | Reference                                                                                                                                                                                                                | Method of Detection                                 | Target Species                                                                                                        | Detection Limit                                                                                      | Specificity towards lipophilic/ vesicle associated oligomers                                                                                     |
|---------|--------------------------------------------------------------------------------------------------------------------------------------------------------------------------------------------------------------------------|-----------------------------------------------------|-----------------------------------------------------------------------------------------------------------------------|------------------------------------------------------------------------------------------------------|--------------------------------------------------------------------------------------------------------------------------------------------------|
| 1       | High performance plasma amyloid- $\beta$ biomarkers for Alzheimer's disease. <i>Nakamura et al., 2018, Nature, 554, 249-254.</i>                                                                                         | Immunoprecipitation-mass spectrometry               | $\text{A}\beta_{42}$ , $\text{A}\beta_{40}$ , $\text{APP}_{669-711}$ (ratios)                                         | Lower limit based on standard curves ( $\sim 40 - 160$ pM range, depending on peptide).              | <b>No:</b> Targets primarily soluble peptides; no focus explicitly on oligomeric or membrane-bound forms.                                        |
| 2       | New ELISAs with high specificity for soluble oligomers of amyloid $\beta$ -protein detect natural $\text{A}\beta$ oligomers in human brain but not CSF. <i>Yang et al., Alzheimer's &amp; Dementia, 2013, 9, 99-112.</i> | Sandwich ELISA                                      | Soluble $\text{A}\beta$ oligomers                                                                                     | $\sim 39$ pg/ml (using synthetic $\text{A}\beta$ dimer standards)                                    | <b>No:</b> Explicitly targets soluble oligomers in brain extracts; no mention of membrane-associated forms.                                      |
| 3       | Subtyping of circulating exosome-bound amyloid $\beta$ reflects brain plaque deposition. <i>Lim et al., Nature Communication, 2019, 10, 1144.</i>                                                                        | Amplified plasmonic exosome platform (with SPR)     | Exosome-carrying prefibrillar $\text{A}\beta_{42}$ aggregates ( $\text{A}\beta_{42}^+$ and $\text{CD63}^+$ exosomes). | $\sim 200$ exosomes ( $10^5$ -fold improvement over Western blot; $10^3$ -fold over standard ELISA). | <b>Yes:</b> Targets $\text{A}\beta$ oligomers bound to exosomes (smallest of the extra-cellular vesicles); distinct from free soluble oligomers. |
| 4       | Bifunctional Fluorescent/ Raman Nanoprobe for the Early Detection of Amyloid. <i>Xia et al., Nature Scientific Report, 2019, 9, 8497.</i>                                                                                | Surface-enhanced Raman scattering and fluorescence. | $\text{A}\beta_{42}$ aggregates/ peptides.                                                                            | Not explicitly stated; linear detection range $1-2$ $\mu\text{M}$ (saturation $> 2$ $\mu\text{M}$ ). | <b>No:</b> No explicit distinction or preference for lipophilic forms.                                                                           |
| 5       | Our method                                                                                                                                                                                                               | Surface-enhanced Raman scattering                   | Lipophilic, membrane-bound small oligomers                                                                            | $\sim 110$ $\text{A}\beta_{42}$ -loaded-Lipid-bilayer coated AgNPs.                                  | <b>Yes:</b> Specifically designed to detect lipophilic membrane associated $\text{A}\beta$                                                       |

|  |  |  |                   |  |            |
|--|--|--|-------------------|--|------------|
|  |  |  | of A $\beta_{42}$ |  | oligomers. |
|--|--|--|-------------------|--|------------|
